# Supplementary material for: The binding of vitamin B12 to transcobalamin(II); structural considerations for bioconjugate design—a molecular dynamics study
Source: Royal Society of Chemistry journal article supplement (doi:10.1039/c003476b), 2010-04-08
Supplement: c003476b.pdf [file c003476b.pdf]

## The Binding of Vitamin B<sub>12</sub> to Transcobalamin(II); Structural Considerations for Bioconjugate Design – a Molecular Dynamics Study

Damian G. Allis[a], Timothy J. Fairchild[b], and Robert P. Doyle[a]

GROMOS96 Force Field Topologies and employed atomic charges for:

B12 (cobalamin)

LYB (cobalamin with the ribose 5'-hydroxy-amide bond-lysine residue)

BCN (cyanocobalamin, CN-Cbl)

LCB (cyanocobalamin, CN-Cbl with the ribose 5'-hydroxy-amide bond-lysine residue)

```
[ B12 ]
[ atoms ]
C27      C      0.38000      0      ; from GLN residue
O28      O     -0.38000      0      ; from GLN residue
N29      NT    -0.83000      0      ; from GLN residue
HAE      H      0.41500      0      ; from GLN residue
HAD      H      0.41500      0      ; from GLN residue
C32      C      0.38000      1      ; from GLN residue
O34      O     -0.38000      1      ; from GLN residue
N33      NT    -0.83000      1      ; from GLN residue
HAG      H      0.41500      1      ; from GLN residue
HAF      H      0.41500      1      ; from GLN residue
C38      C      0.38000      2      ; from GLN residue
O39      O     -0.38000      2      ; from GLN residue
N40      NT    -0.83000      2      ; from GLN residue
HAI      H      0.41500      2      ; from GLN residue
HAH      H      0.41500      2      ; from GLN residue
C43      C      0.38000      3      ; from GLN residue
O44      O     -0.38000      3      ; from GLN residue
N45      NT    -0.83000      3      ; from GLN residue
HAK      H      0.41500      3      ; from GLN residue
HAJ      H      0.41500      3      ; from GLN residue
C50      C      0.38000      4      ; from GLN residue
O51      O     -0.38000      4      ; from GLN residue
N52      NT    -0.83000      4      ; from GLN residue
HAM      H      0.41500      4      ; from GLN residue
HAL      H      0.41500      4      ; from GLN residue
C61      C      0.38000      5      ; from GLN residue
O63      O     -0.38000      5      ; from GLN residue
N62      NT    -0.83000      5      ; from GLN residue
HAO      H      0.41500      5      ; from GLN residue
HAN      H      0.41500      5      ; from GLN residue
C20      CH3    0.00000      6      ; methyl group
C25      CH3    0.00000      7      ; methyl group
C36      CH3    0.00000      8      ; methyl group
C46      CH3    0.00000      9      ; methyl group
C47      CH3    0.00000     10      ; methyl group
C54      CH3    0.00000     11      ; methyl group
C26      CH2    0.00000     12      ; non-polar CHn fragments
C30      CH2    0.00000     13      ; non-polar CHn fragments
C31      CH2    0.00000     13      ; non-polar CHn fragments
C37      CH2    0.00000     14      ; non-polar CHn fragments
C41      CH2    0.00000     15      ; non-polar CHn fragments
C42      CH2    0.00000     15      ; non-polar CHn fragments
C48      CH2    0.00000     16      ; non-polar CHn fragments
C49      CH2    0.00000     16      ; non-polar CHn fragments
C56      CH2    0.00000     17      ; non-polar CHn fragments
C55      CH2    0.00000     17      ; non-polar CHn fragments
C60      CH2    0.00000     18      ; non-polar CHn fragments
C2R      CH1    0.15000     19      ; C2*-O2*-H2* from ADE
O7R      OA    -0.54800     19      ; C2*-O2*-H2* from ADE
HAA      H      0.39800     19      ; C2*-O2*-H2* from ADE
C1R      CH1    0.20000     20      ; C1*-O4*-C4* from ADE
O6R      OA    -0.36000     20      ; C1*-O4*-C4* from ADE
C4R      CH1    0.16000     20      ; C1*-O4*-C4* from ADE
C3R      CH1    0.00000     21      ; C3* from ADE
C5R      CH2    0.15000     22      ; C2*-O2*-H2* from ADE
O8R      OA    -0.54800     22      ; C2*-O2*-H2* from ADE
```

Supplementary Material (ESI) for Molecular BioSystems  
This journal is (c) The Royal Society of Chemistry, 2010

```

HAB      H      0.39800    22 ; C2*-O2*-H2* from ADE
P        P      2.20000    23 ; PO3+O3* fragment from ADE
O2       OA     -0.80000    23 ; PO3+O3* fragment from ADE
O4       OM     -1.00000    23 ; PO3+O3* fragment from ADE
O5       OM     -1.00000    23 ; PO3+O3* fragment from ADE
O3       OA     -0.80000    23 ; PO3+O3* fragment from ADE
C2P      CH1     0.35000    24 ; non-polar CHn fragment
C3P      CH3     0.00000    24 ; non-polar CHn fragment
C1P      CH2     0.00000    24 ; non-polar CHn fragment
N59      N      -0.28000    25 ; tempered GLN fragment charges
HAC      H      0.28000    25 ; tempered GLN fragment charges
C57      C      0.38000    25 ; tempered GLN fragment charges
O58      O      -0.38000    25 ; tempered GLN fragment charges
C5B      C      0.00000    26 ; dimethylbenzimidazole C-CH3 group (non-polar)
C5M      CH3     0.00000    26 ; dimethylbenzimidazole C-CH3 group (non-polar)
C6B      C      0.00000    27 ; dimethylbenzimidazole C-CH3 group (non-polar)
C6M      CH3     0.00000    27 ; dimethylbenzimidazole C-CH3 group (non-polar)
C4B      C      -0.14000    28 ; dimethylbenzimidazole aromatic C-H from TRP, PHE
H4B      H      0.14000    28 ; dimethylbenzimidazole aromatic C-H from TRP, PHE
C7B      C      -0.14000    29 ; dimethylbenzimidazole aromatic C-H from TRP, PHE
H7B      H      0.14000    29 ; dimethylbenzimidazole aromatic C-H from TRP, PHE
N3B      NR     -0.55000    30 ; dimethylbenzimidazole polar aromatic NC fragment
C9B      C      0.20000    30 ; dimethylbenzimidazole polar aromatic NC fragment
N1B      NR     -0.30000    31 ; dimethylbenzimidazole polar aromatic NC fragment
C8B      C      0.20000    31 ; dimethylbenzimidazole polar aromatic NC fragment
C2B      C      0.23000    32 ; dimethylbenzimidazole aromatic C-H from TRP, PHE
H2B      H      0.23000    32 ; dimethylbenzimidazole aromatic C-H from TRP, PHE
C5       C      -0.05000    33 ; C-CH3 group (non-polar)
C35      CH3     0.00000    33 ; C-CH3 group (non-polar)
C15      C      -0.05000    34 ; C-CH3 group (non-polar)
C53      CH3     0.00000    34 ; C-CH3 group (non-polar)
FE       FE      0.62000    35 ; HEMC Fe-N group
N21      NR     -0.44000    35 ; HEMC Fe-N group
N22      NR     -0.50000    35 ; HEMC Fe-N group
N23      NR     -0.50000    35 ; HEMC Fe-N group
N24      NR     -0.44000    35 ; HEMC Fe-N group
C1       CH0     0.22000    36 ; non-polar HEMC-derived corrin atoms
C2       CH0     0.00000    36 ; non-polar HEMC-derived corrin atoms
C3       CH1     0.00000    36 ; non-polar HEMC-derived corrin atoms
C4       C      0.38000    36 ; non-polar HEMC-derived corrin atoms
C6       C      0.29000    37 ; non-polar HEMC-derived corrin atoms
C7       CH0     0.00000    37 ; non-polar HEMC-derived corrin atoms
C8       CH1     0.00000    37 ; non-polar HEMC-derived corrin atoms
C9       C      0.35000    37 ; non-polar HEMC-derived corrin atoms
C16      C      0.38000    38 ; non-polar HEMC-derived corrin atoms
C17      CH0     0.00000    38 ; non-polar HEMC-derived corrin atoms
C18      CH1     0.00000    38 ; non-polar HEMC-derived corrin atoms
C19      CH1     0.24000    38 ; non-polar HEMC-derived corrin atoms
C11      C      0.35000    39 ; non-polar HEMC-derived corrin atoms
C12      CH0     0.00000    39 ; non-polar HEMC-derived corrin atoms
C13      CH1     0.00000    39 ; non-polar HEMC-derived corrin atoms
C14      C      0.29000    39 ; non-polar HEMC-derived corrin atoms
C10      C      -0.24000    40 ; aromatic C-H from TRP, PHE
H10      H      0.14000    40 ; aromatic C-H from TRP, PHE
;
; Since CO is not defined as an atom in GROMOSxx, CO is converted to FE and the HEME
; values are employed. This is a workaround due for proper implementation.
;
[ bonds ]
; ai      aj      gromos type
C26      C27      gb_27 ; from GLN fragment 0
C27      O28      gb_5  ; from GLN
C27      N29      gb_9  ; from GLN
N29      HAE      gb_2  ; from GLN
N29      HAD      gb_2  ; from GLN
C31      C32      gb_27 ; from GLN fragment 1
C32      O34      gb_5  ; from GLN
C32      N33      gb_9  ; from GLN
N33      HAG      gb_2  ; from GLN
N33      HAF      gb_2  ; from GLN
C37      C38      gb_27 ; from GLN fragment 2
C38      O39      gb_5  ; from GLN
C38      N40      gb_9  ; from GLN
N40      HAI      gb_2  ; from GLN
N40      HAH      gb_2  ; from GLN
C42      C43      gb_27 ; from GLN fragment 3
C43      O44      gb_5  ; from GLN
C43      N45      gb_9  ; from GLN
N45      HAK      gb_2  ; from GLN
N45      HAJ      gb_2  ; from GLN
C49      C50      gb_27 ; from GLN fragment 4

```

Supplementary Material (ESI) for Molecular BioSystems  
This journal is (c) The Royal Society of Chemistry, 2010

|     |     |       |                                            |
|-----|-----|-------|--------------------------------------------|
| C50 | O51 | gb_5  | ; from GLN                                 |
| C50 | N52 | gb_9  | ; from GLN                                 |
| N52 | HAM | gb_2  | ; from GLN                                 |
| N52 | HAL | gb_2  | ; from GLN                                 |
| C60 | C61 | gb_27 | ; from GLN fragment 5                      |
| C61 | O63 | gb_5  | ; from GLN                                 |
| C61 | N62 | gb_9  | ; from GLN                                 |
| N62 | HAO | gb_2  | ; from GLN                                 |
| N62 | HAN | gb_2  | ; from GLN                                 |
| FE  | N21 | gb_35 | ; FE-N bond from HEMC                      |
| FE  | N22 | gb_35 | ; FE-N bond from HEMC                      |
| FE  | N23 | gb_35 | ; FE-N bond from HEMC                      |
| FE  | N24 | gb_35 | ; FE-N bond from HEMC                      |
| FE  | N3B | gb_37 | ; FE-N3B bond from HEMC not in corrin ring |
| P   | O2  | gb_28 | ; from ADE phosphate                       |
| P   | O4  | gb_24 | ; from ADE phosphate                       |
| P   | O5  | gb_24 | ; from ADE phosphate                       |
| P   | O3  | gb_28 | ; from ADE phosphate                       |
| N21 | C1  | gb_21 | ; corrin ring N-CHn bonds                  |
| N21 | C4  | gb_14 | ; corrin ring N-C bonds                    |
| N22 | C6  | gb_14 | ; corrin ring N-C bonds                    |
| N22 | C9  | gb_14 | ; corrin ring N-C bonds                    |
| N23 | C11 | gb_14 | ; corrin ring N-C bonds                    |
| N23 | C14 | gb_14 | ; corrin ring N-C bonds                    |
| N24 | C16 | gb_14 | ; corrin ring N-C bonds                    |
| N24 | C19 | gb_21 | ; corrin ring N-CHn bonds                  |
| C30 | C31 | gb_27 | ; CH2-CH2 bonds                            |
| C41 | C42 | gb_27 | ; CH2-CH2 bonds                            |
| C48 | C49 | gb_27 | ; CH2-CH2 bonds                            |
| C55 | C56 | gb_27 | ; CH2-CH2 bonds                            |
| C56 | C57 | gb_27 | ; CH2-CH2 bonds                            |
| N1B | C1R | gb_22 | ; sugar bonds from ADE                     |
| C1R | C2R | gb_26 | ; sugar bonds from ADE                     |
| C2R | O7R | gb_20 | ; sugar bonds from ADE                     |
| O7R | HAA | gb_1  | ; sugar bonds from ADE                     |
| C2R | C3R | gb_26 | ; sugar bonds from ADE                     |
| C3R | C4R | gb_26 | ; sugar bonds from ADE                     |
| C3R | O2  | gb_20 | ; sugar bonds from ADE                     |
| C4R | C5R | gb_26 | ; sugar bonds from ADE                     |
| C5R | O8R | gb_20 | ; sugar bonds from ADE                     |
| O8R | HAB | gb_1  | ; sugar bonds from ADE                     |
| C4R | O6R | gb_20 | ; sugar bonds from ADE                     |
| O6R | C1R | gb_20 | ; sugar bonds from ADE                     |
| C1P | N59 | gb_9  | ; amide corrin - phosphate linkage         |
| C1P | C2P | gb_27 | ; amide corrin - phosphate linkage         |
| C2P | C3P | gb_27 | ; amide corrin - phosphate linkage         |
| C2P | O3  | gb_20 | ; amide corrin - phosphate linkage         |
| N59 | HAC | gb_2  | ; amide corrin - phosphate linkage         |
| N59 | C57 | gb_9  | ; amide corrin - phosphate linkage         |
| C57 | O58 | gb_5  | ; amide corrin - phosphate linkage         |
| N1B | C2B | gb_10 | ; dimethylbenzimidazole ring               |
| C2B | N3B | gb_10 | ; dimethylbenzimidazole ring               |
| C2B | H2B | gb_3  | ; dimethylbenzimidazole ring               |
| N3B | C9B | gb_10 | ; dimethylbenzimidazole ring               |
| C9B | C4B | gb_16 | ; dimethylbenzimidazole ring               |
| C4B | C5B | gb_16 | ; dimethylbenzimidazole ring               |
| C4B | H4B | gb_3  | ; dimethylbenzimidazole ring               |
| C5B | C6B | gb_16 | ; dimethylbenzimidazole ring               |
| C5B | C5M | gb_27 | ; dimethylbenzimidazole ring               |
| C6B | C7B | gb_16 | ; dimethylbenzimidazole ring               |
| C6B | C6M | gb_27 | ; dimethylbenzimidazole ring               |
| C7B | C8B | gb_16 | ; dimethylbenzimidazole ring               |
| C7B | H7B | gb_3  | ; dimethylbenzimidazole ring               |
| C8B | N1B | gb_10 | ; dimethylbenzimidazole ring               |
| C8B | C9B | gb_16 | ; dimethylbenzimidazole ring               |
| C1  | C20 | gb_27 | ; corrin ring carbon framework             |
| C1  | C2  | gb_27 | ; corrin ring carbon framework             |
| C2  | C3  | gb_27 | ; corrin ring carbon framework             |
| C2  | C25 | gb_27 | ; corrin ring carbon framework             |
| C2  | C26 | gb_27 | ; corrin ring carbon framework             |
| C3  | C4  | gb_27 | ; corrin ring carbon framework             |
| C3  | C30 | gb_27 | ; corrin ring carbon framework             |
| C4  | C5  | gb_17 | ; corrin ring carbon framework             |
| C5  | C6  | gb_17 | ; corrin ring carbon framework             |
| C5  | C35 | gb_27 | ; corrin ring carbon framework             |
| C6  | C7  | gb_27 | ; corrin ring carbon framework             |
| C7  | C8  | gb_27 | ; corrin ring carbon framework             |
| C7  | C37 | gb_27 | ; corrin ring carbon framework             |
| C7  | C36 | gb_27 | ; corrin ring carbon framework             |
| C8  | C9  | gb_27 | ; corrin ring carbon framework             |
| C8  | C41 | gb_27 | ; corrin ring carbon framework             |

Supplementary Material (ESI) for Molecular BioSystems  
This journal is (c) The Royal Society of Chemistry, 2010

```

C9      C10      gb_17      ;      corrin ring carbon framework
C10     C11      gb_17      ;      corrin ring carbon framework
C11     C12      gb_27      ;      corrin ring carbon framework
C12     C46      gb_27      ;      corrin ring carbon framework
C12     C47      gb_27      ;      corrin ring carbon framework
C12     C13      gb_27      ;      corrin ring carbon framework
C13     C14      gb_27      ;      corrin ring carbon framework
C13     C48      gb_27      ;      corrin ring carbon framework
C14     C15      gb_17      ;      corrin ring carbon framework
C15     C16      gb_17      ;      corrin ring carbon framework
C15     C53      gb_27      ;      corrin ring carbon framework
C16     C17      gb_27      ;      corrin ring carbon framework
C17     C18      gb_27      ;      corrin ring carbon framework
C17     C54      gb_27      ;      corrin ring carbon framework
C17     C55      gb_27      ;      corrin ring carbon framework
C18     C19      gb_27      ;      corrin ring carbon framework
C18     C60      gb_27      ;      corrin ring carbon framework
C19     C1       gb_27      ;      corrin ring carbon framework
C10     H10      gb_3       ;      corrin ring C10-H10 bond
[ exclusions ]
; ai      aj
FE      C2
FE      C3
FE      C5
FE      C7
FE      C8
FE      C10
FE      C12
FE      C13
FE      C15
FE      C17
FE      C18
FE      C20
N21     C25
N21     C26
N21     C30
N21     C35
N21     C6
N21     C9
N21     C11
N21     C14
N21     C16
N21     C19
N21     C10
N22     C1
N22     C4
N22     C36
N22     C37
N22     C11
N22     C14
N22     C16
N22     C19
N22     C15
N23     C16
N23     C19
N23     C1
N23     C4
N23     C6
N23     C9
N23     C46
N23     C47
N23     C48
N23     C5
N24     C4
N24     C5
N24     C6
N24     C9
N24     C10
N24     C11
N24     C14
N24     C55
N24     C54
N24     C60
C1R     C7B
C1R     C9B
C1R     N3B
N1B     C6B
N1B     C4B
C8B     C5B
C8B     C5M
C8B     C6M

```

Supplementary Material (ESI) for Molecular BioSystems  
This journal is (c) The Royal Society of Chemistry, 2010

```

C7B C4B
C7B N3B
C7B C2B
C2B C9B
C5B C2B
C5M C6M
C1 C30 ; HEMC-based C framework exclusions
C1 C5 ; HEMC-based C framework exclusions
C2 C5 ; HEMC-based C framework exclusions
C3 C35 ; HEMC-based C framework exclusions
C3 C6 ; HEMC-based C framework exclusions
C4 C26 ; HEMC-based C framework exclusions
C4 C7 ; HEMC-based C framework exclusions
C30 C26 ; HEMC-based C framework exclusions
C30 C5 ; HEMC-based C framework exclusions
C5 C8 ; HEMC-based C framework exclusions
C5 C9 ; HEMC-based C framework exclusions
C5 C36 ; HEMC-based C framework exclusions
C5 C37 ; HEMC-based C framework exclusions
C35 C7 ; HEMC-based C framework exclusions
C6 C41 ; HEMC-based C framework exclusions
C6 C10 ; HEMC-based C framework exclusions
C7 C10 ; HEMC-based C framework exclusions
C8 H10 ; HEMC-based C framework exclusions
C8 C11 ; HEMC-based C framework exclusions
C9 C36 ; HEMC-based C framework exclusions
C9 C37 ; HEMC-based C framework exclusions
C9 C12 ; HEMC-based C framework exclusions
C36 C41 ; HEMC-based C framework exclusions
C37 C10 ; HEMC-based C framework exclusions
C10 C13 ; HEMC-based C framework exclusions
C10 C14 ; HEMC-based C framework exclusions
C10 C46 ; HEMC-based C framework exclusions
C10 C47 ; HEMC-based C framework exclusions
H10 C12 ; HEMC-based C framework exclusions
C11 C48 ; HEMC-based C framework exclusions
C11 C15 ; HEMC-based C framework exclusions
C12 C15 ; HEMC-based C framework exclusions
C13 C53 ; HEMC-based C framework exclusions
C13 C16 ; HEMC-based C framework exclusions
C14 C46 ; HEMC-based C framework exclusions
C14 C47 ; HEMC-based C framework exclusions
C14 C17 ; HEMC-based C framework exclusions
C46 C48 ; HEMC-based C framework exclusions
C47 C48 ; HEMC-based C framework exclusions
C48 C15 ; HEMC-based C framework exclusions
C15 C18 ; HEMC-based C framework exclusions
C15 C19 ; HEMC-based C framework exclusions
C15 C54 ; HEMC-based C framework exclusions
C15 C55 ; HEMC-based C framework exclusions
C53 C17 ; HEMC-based C framework exclusions
C16 C60 ; HEMC-based C framework exclusions
C19 C54 ; HEMC-based C framework exclusions
C19 C55 ; HEMC-based C framework exclusions
C54 C60 ; HEMC-based C framework exclusions
C55 C60 ; HEMC-based C framework exclusions
[ angles ]
; ai aj ak gromos type
C2 C26 C27 ga_15 ; from GLN, fragment 1
C26 C27 O28 ga_30 ; from GLN
C26 C27 N29 ga_19 ; from GLN
O28 C27 N29 ga_33 ; from GLN
C27 N29 HAE ga_23 ; from GLN
C27 N29 HAD ga_23 ; from GLN
HAE N29 HAD ga_24 ; from GLN
C30 C31 C32 ga_15 ; from GLN, fragment 2
C31 C32 O34 ga_30 ; from GLN
C31 C32 N33 ga_19 ; from GLN
O34 C32 N33 ga_33 ; from GLN
C32 N33 HAG ga_23 ; from GLN
C32 N33 HAF ga_23 ; from GLN
HAG N33 HAF ga_24 ; from GLN
C7 C37 C38 ga_15 ; from GLN, fragment 3
C37 C38 O39 ga_30 ; from GLN
C37 C38 N40 ga_19 ; from GLN
O39 C38 N40 ga_33 ; from GLN
C38 N40 HAI ga_23 ; from GLN
C38 N40 HAH ga_23 ; from GLN
HAI N40 HAH ga_24 ; from GLN
C41 C42 C43 ga_15 ; from GLN, fragment 4
C42 C43 O44 ga_30 ; from GLN

```

Supplementary Material (ESI) for Molecular BioSystems  
This journal is (c) The Royal Society of Chemistry, 2010

|     |     |     |       |                                                            |
|-----|-----|-----|-------|------------------------------------------------------------|
| C42 | C43 | N45 | ga_19 | ; from GLN                                                 |
| O44 | C43 | N45 | ga_33 | ; from GLN                                                 |
| C43 | N45 | HAK | ga_23 | ; from GLN                                                 |
| C43 | N45 | HAJ | ga_23 | ; from GLN                                                 |
| HAK | N45 | HAJ | ga_24 | ; from GLN                                                 |
| C48 | C49 | C50 | ga_15 | ; from GLN, fragment 5                                     |
| C49 | C50 | O51 | ga_30 | ; from GLN                                                 |
| C49 | C50 | N52 | ga_19 | ; from GLN                                                 |
| O51 | C50 | N52 | ga_33 | ; from GLN                                                 |
| C50 | N52 | HAM | ga_23 | ; from GLN                                                 |
| C50 | N52 | HAL | ga_23 | ; from GLN                                                 |
| HAM | N52 | HAL | ga_24 | ; from GLN                                                 |
| C18 | C60 | C61 | ga_15 | ; from GLN, fragment 6                                     |
| C60 | C61 | O63 | ga_30 | ; from GLN                                                 |
| C60 | C61 | N62 | ga_19 | ; from GLN                                                 |
| O63 | C61 | N62 | ga_33 | ; from GLN                                                 |
| C61 | N62 | HAO | ga_23 | ; from GLN                                                 |
| C61 | N62 | HAN | ga_23 | ; from GLN                                                 |
| HAO | N62 | HAN | ga_24 | ; from GLN                                                 |
| N21 | FE  | N22 | ga_2  | ; corrin ring Fe-N angle                                   |
| N21 | FE  | N24 | ga_2  | ; corrin ring Fe-N angle                                   |
| N22 | FE  | N23 | ga_2  | ; corrin ring Fe-N angle                                   |
| N23 | FE  | N24 | ga_2  | ; corrin ring Fe-N angle                                   |
| N21 | FE  | N3B | ga_2  | ; corrin-Fe-dimethylbenzimidazole                          |
| N22 | FE  | N3B | ga_2  | ; corrin-Fe-dimethylbenzimidazole                          |
| N23 | FE  | N3B | ga_2  | ; corrin-Fe-dimethylbenzimidazole                          |
| N24 | FE  | N3B | ga_2  | ; corrin-Fe-dimethylbenzimidazole                          |
| FE  | N21 | C1  | ga_34 | ; corrin Fe-N-C angles (based on HEMC)                     |
| FE  | N21 | C4  | ga_34 | ; corrin Fe-N-C angles (based on HEMC)                     |
| FE  | N22 | C6  | ga_34 | ; corrin Fe-N-C angles (based on HEMC)                     |
| FE  | N22 | C9  | ga_34 | ; corrin Fe-N-C angles (based on HEMC)                     |
| FE  | N23 | C11 | ga_34 | ; corrin Fe-N-C angles (based on HEMC)                     |
| FE  | N23 | C14 | ga_34 | ; corrin Fe-N-C angles (based on HEMC)                     |
| FE  | N24 | C16 | ga_34 | ; corrin Fe-N-C angles (based on HEMC)                     |
| FE  | N24 | C19 | ga_34 | ; corrin Fe-N-C angles (based on HEMC)                     |
| FE  | N3B | C9B | ga_34 | ; Fe-dimethylbenzimidazole-N,C angle                       |
| FE  | N3B | C2B | ga_34 | ; Fe-dimethylbenzimidazole-N,C angle                       |
| C8B | N1B | C2B | ga_7  | ; angle containing C8B, see minimization issues discussion |
| N1B | C8B | C9B | ga_7  | ; angle containing C8B, see minimization issues discussion |
| C8B | C9B | N3B | ga_7  | ; angle containing C8B, see minimization issues discussion |
| C7B | C8B | N1B | ga_39 | ; angle containing C8B, see minimization issues discussion |
| C8B | N1B | C1R | ga_37 | ; angle containing C8B, see minimization issues discussion |
| C4B | C9B | C8B | ga_27 | ; angle containing C8B, see minimization issues discussion |
| C6B | C7B | C8B | ga_27 | ; angle containing C8B, see minimization issues discussion |
| C7B | C8B | C9B | ga_27 | ; angle containing C8B, see minimization issues discussion |
| N21 | C1  | C2  | ga_13 | ; corrin ring-specific but HEMC-derived angles             |
| N21 | C1  | C20 | ga_13 | ; corrin ring-specific but HEMC-derived angles             |
| N21 | C4  | C3  | ga_33 | ; corrin ring-specific but HEMC-derived angles             |
| C4  | N21 | C1  | ga_6  | ; corrin ring-specific but HEMC-derived angles             |
| C5  | C4  | N21 | ga_33 | ; corrin ring-specific but HEMC-derived angles             |
| C19 | C1  | N21 | ga_13 | ; corrin ring-specific but HEMC-derived angles             |
| N22 | C6  | C5  | ga_33 | ; corrin ring-specific but HEMC-derived angles             |
| N22 | C6  | C7  | ga_33 | ; corrin ring-specific but HEMC-derived angles             |
| N22 | C9  | C8  | ga_33 | ; corrin ring-specific but HEMC-derived angles             |
| C9  | N22 | C6  | ga_6  | ; corrin ring-specific but HEMC-derived angles             |
| C10 | C9  | N22 | ga_33 | ; corrin ring-specific but HEMC-derived angles             |
| N23 | C11 | C10 | ga_33 | ; corrin ring-specific but HEMC-derived angles             |
| N23 | C11 | C12 | ga_33 | ; corrin ring-specific but HEMC-derived angles             |
| N23 | C14 | C13 | ga_33 | ; corrin ring-specific but HEMC-derived angles             |
| C14 | N23 | C11 | ga_6  | ; corrin ring-specific but HEMC-derived angles             |
| C15 | C14 | N23 | ga_33 | ; corrin ring-specific but HEMC-derived angles             |
| N24 | C16 | C15 | ga_33 | ; corrin ring-specific but HEMC-derived angles             |
| N24 | C19 | C1  | ga_13 | ; corrin ring-specific but HEMC-derived angles             |
| C19 | N24 | C16 | ga_6  | ; corrin ring-specific but HEMC-derived angles             |
| C17 | C16 | N24 | ga_33 | ; corrin ring-specific but HEMC-derived angles             |
| C18 | C19 | N24 | ga_13 | ; corrin ring-specific but HEMC-derived angles             |
| C3R | O2  | P   | ga_26 | ; phosphate angle from ADE                                 |
| O2  | P   | O3  | ga_5  | ; phosphate angle from ADE                                 |
| O2  | P   | O4  | ga_14 | ; phosphate angle from ADE                                 |
| O2  | P   | O5  | ga_14 | ; phosphate angle from ADE                                 |
| O3  | P   | O4  | ga_14 | ; phosphate angle from ADE                                 |
| O3  | P   | O5  | ga_14 | ; phosphate angle from ADE                                 |
| O4  | P   | O5  | ga_29 | ; phosphate angle from ADE                                 |
| P   | O3  | C2P | ga_26 | ; phosphate angle from ADE                                 |
| O2  | C3R | C2R | ga_9  | ; phosphate oxygen to CHn carbons from ADE                 |
| O2  | C3R | C4R | ga_9  | ; phosphate oxygen to CHn carbons from ADE                 |
| O3  | C2P | C1P | ga_9  | ; phosphate oxygen to CHn carbons from ADE                 |
| O3  | C2P | C3P | ga_9  | ; phosphate oxygen to CHn carbons from ADE                 |
| C1  | C2  | C26 | ga_13 | ; CHn-CHn-CHn angles                                       |
| C1  | C2  | C25 | ga_13 | ; CHn-CHn-CHn angles                                       |
| C1  | C2  | C3  | ga_13 | ; CHn-CHn-CHn angles                                       |

Supplementary Material (ESI) for Molecular BioSystems  
This journal is (c) The Royal Society of Chemistry, 2010

|     |     |     |       |   |                          |                             |  |
|-----|-----|-----|-------|---|--------------------------|-----------------------------|--|
| C1  | C19 | C18 | ga_13 | ; | CHn-CHn-CHn              | angles                      |  |
| C2  | C1  | C19 | ga_13 | ; | CHn-CHn-CHn              | angles                      |  |
| C2  | C1  | C20 | ga_13 | ; | CHn-CHn-CHn              | angles                      |  |
| C2  | C3  | C30 | ga_13 | ; | CHn-CHn-CHn              | angles                      |  |
| C3  | C2  | C25 | ga_13 | ; | CHn-CHn-CHn              | angles                      |  |
| C3  | C2  | C26 | ga_13 | ; | CHn-CHn-CHn              | angles                      |  |
| C3  | C30 | C31 | ga_13 | ; | CHn-CHn-CHn              | angles                      |  |
| C7  | C8  | C41 | ga_13 | ; | CHn-CHn-CHn              | angles                      |  |
| C8  | C41 | C42 | ga_13 | ; | CHn-CHn-CHn              | angles                      |  |
| C12 | C13 | C48 | ga_13 | ; | CHn-CHn-CHn              | angles                      |  |
| C13 | C12 | C46 | ga_13 | ; | CHn-CHn-CHn              | angles                      |  |
| C13 | C12 | C47 | ga_13 | ; | CHn-CHn-CHn              | angles                      |  |
| C13 | C48 | C49 | ga_13 | ; | CHn-CHn-CHn              | angles                      |  |
| C17 | C18 | C19 | ga_13 | ; | CHn-CHn-CHn              | angles                      |  |
| C17 | C18 | C60 | ga_13 | ; | CHn-CHn-CHn              | angles                      |  |
| C17 | C55 | C56 | ga_13 | ; | CHn-CHn-CHn              | angles                      |  |
| C18 | C17 | C54 | ga_13 | ; | CHn-CHn-CHn              | angles                      |  |
| C18 | C17 | C55 | ga_13 | ; | CHn-CHn-CHn              | angles                      |  |
| C19 | C1  | C20 | ga_13 | ; | CHn-CHn-CHn              | angles                      |  |
| C19 | C18 | C60 | ga_13 | ; | CHn-CHn-CHn              | angles                      |  |
| C25 | C2  | C26 | ga_13 | ; | CHn-CHn-CHn              | angles                      |  |
| C46 | C12 | C47 | ga_13 | ; | CHn-CHn-CHn              | angles                      |  |
| C54 | C17 | C55 | ga_13 | ; | CHn-CHn-CHn              | angles                      |  |
| C36 | C7  | C37 | ga_13 | ; | CHn-CHn-CHn              | angles                      |  |
| C2  | C3  | C4  | ga_15 | ; | sp3-sp3-sp2              | corrin ring carbon angle    |  |
| C4  | C3  | C30 | ga_15 | ; | sp3-sp3-sp2              | corrin ring carbon angle    |  |
| C6  | C7  | C8  | ga_15 | ; | sp3-sp3-sp2              | corrin ring carbon angle    |  |
| C6  | C7  | C36 | ga_15 | ; | sp3-sp3-sp2              | corrin ring carbon angle    |  |
| C6  | C7  | C37 | ga_15 | ; | sp3-sp3-sp2              | corrin ring carbon angle    |  |
| C7  | C8  | C9  | ga_15 | ; | sp3-sp3-sp2              | corrin ring carbon angle    |  |
| C8  | C7  | C36 | ga_15 | ; | sp3-sp3-sp2              | corrin ring carbon angle    |  |
| C8  | C7  | C37 | ga_15 | ; | sp3-sp3-sp2              | corrin ring carbon angle    |  |
| C9  | C8  | C41 | ga_15 | ; | sp3-sp3-sp2              | corrin ring carbon angle    |  |
| C11 | C12 | C13 | ga_15 | ; | sp3-sp3-sp2              | corrin ring carbon angle    |  |
| C11 | C12 | C46 | ga_15 | ; | sp3-sp3-sp2              | corrin ring carbon angle    |  |
| C11 | C12 | C47 | ga_15 | ; | sp3-sp3-sp2              | corrin ring carbon angle    |  |
| C12 | C13 | C14 | ga_15 | ; | sp3-sp3-sp2              | corrin ring carbon angle    |  |
| C14 | C13 | C48 | ga_15 | ; | sp3-sp3-sp2              | corrin ring carbon angle    |  |
| C16 | C17 | C18 | ga_15 | ; | sp3-sp3-sp2              | corrin ring carbon angle    |  |
| C16 | C17 | C54 | ga_15 | ; | sp3-sp3-sp2              | corrin ring carbon angle    |  |
| C16 | C17 | C55 | ga_15 | ; | sp3-sp3-sp2              | corrin ring carbon angle    |  |
| C4  | C5  | C6  | ga_27 | ; | sp2-sp2-sp2              | corrin ring carbon angle    |  |
| C9  | C10 | C11 | ga_27 | ; | sp2-sp2-sp2              | corrin ring carbon angle    |  |
| C14 | C15 | C16 | ga_27 | ; | sp2-sp2-sp2              | corrin ring carbon angle    |  |
| C3  | C4  | C5  | ga_37 | ; | sp3-sp2-sp2              | corrin ring carbon angle    |  |
| C4  | C5  | C35 | ga_37 | ; | sp3-sp2-sp2              | corrin ring carbon angle    |  |
| C5  | C6  | C7  | ga_37 | ; | sp3-sp2-sp2              | corrin ring carbon angle    |  |
| C6  | C5  | C35 | ga_37 | ; | sp3-sp2-sp2              | corrin ring carbon angle    |  |
| C8  | C9  | C10 | ga_37 | ; | sp3-sp2-sp2              | corrin ring carbon angle    |  |
| C10 | C11 | C12 | ga_37 | ; | sp3-sp2-sp2              | corrin ring carbon angle    |  |
| C13 | C14 | C15 | ga_37 | ; | sp3-sp2-sp2              | corrin ring carbon angle    |  |
| C14 | C15 | C53 | ga_37 | ; | sp3-sp2-sp2              | corrin ring carbon angle    |  |
| C15 | C16 | C17 | ga_37 | ; | sp3-sp2-sp2              | corrin ring carbon angle    |  |
| C16 | C15 | C53 | ga_37 | ; | sp3-sp2-sp2              | corrin ring carbon angle    |  |
| C5M | C5B | C4B | ga_37 | ; | sp2-sp2-methyl           | dimethylbenzimidazole angle |  |
| C5M | C5B | C6B | ga_37 | ; | sp2-sp2-methyl           | dimethylbenzimidazole angle |  |
| C6M | C6B | C5B | ga_37 | ; | sp2-sp2-methyl           | dimethylbenzimidazole angle |  |
| C6M | C6B | C7B | ga_37 | ; | sp2-sp2-methyl           | dimethylbenzimidazole angle |  |
| C4B | C5B | C6B | ga_27 | ; | Csp2-Csp2-Csp2           | dimethylbenzimidazole angle |  |
| C5B | C4B | C9B | ga_27 | ; | Csp2-Csp2-Csp2           | dimethylbenzimidazole angle |  |
| C5B | C6B | C7B | ga_27 | ; | Csp2-Csp2-Csp2           | dimethylbenzimidazole angle |  |
| N1B | C1R | C2R | ga_9  | ; | from ADE Nsp2-containing | dimethylbenzimidazole angle |  |
| N1B | C1R | O6R | ga_9  | ; | from ADE Nsp2-containing | dimethylbenzimidazole angle |  |
| N1B | C2B | N3B | ga_7  | ; | from ADE Nsp2-containing | dimethylbenzimidazole angle |  |
| C2B | N1B | C1R | ga_37 | ; | from ADE Nsp2-containing | dimethylbenzimidazole angle |  |
| N3B | C9B | C4B | ga_39 | ; | from ADE Nsp2-containing | dimethylbenzimidazole angle |  |
| C9B | N3B | C2B | ga_7  | ; | from ADE Nsp2-containing | dimethylbenzimidazole angle |  |
| C1R | C2R | C3R | ga_8  | ; | from ADE                 | sugar angle                 |  |
| C1R | C2R | O7R | ga_9  | ; | from ADE                 | sugar angle                 |  |
| C1R | O6R | C4R | ga_10 | ; | from ADE                 | sugar angle                 |  |
| C2R | C1R | O6R | ga_9  | ; | from ADE                 | sugar angle                 |  |
| C2R | C3R | C4R | ga_8  | ; | from ADE                 | sugar angle                 |  |
| C2R | O7R | HAA | ga_12 | ; | from ADE                 | sugar angle                 |  |
| C3R | C2R | O7R | ga_9  | ; | from ADE                 | sugar angle                 |  |
| C3R | C4R | C5R | ga_8  | ; | from ADE                 | sugar angle                 |  |
| C3R | C4R | O6R | ga_9  | ; | from ADE                 | sugar angle                 |  |
| C4R | C5R | O8R | ga_9  | ; | from ADE                 | sugar angle                 |  |
| C5R | O8R | HAB | ga_12 | ; | from ADE                 | sugar angle                 |  |
| C5R | C4R | O6R | ga_9  | ; | from ADE                 | sugar angle                 |  |
| C1P | C2P | C3P | ga_13 | ; | amide linkage            | angle                       |  |
| C57 | C56 | C55 | ga_13 | ; | amide linkage            | angle                       |  |

Supplementary Material (ESI) for Molecular BioSystems  
This journal is (c) The Royal Society of Chemistry, 2010

```

C57 N59 HAC ga_23 ; from GLN angle
N59 C57 O58 ga_33 ; from GLN angle
C56 C57 N59 ga_19 ; from GLN angle
O58 C57 C56 ga_30 ; from GLN angle
C1P N59 C57 ga_31 ; from force field angle definitions
C1P N59 HAC ga_18 ; from force field angle definitions
C2P C1P N59 ga_15 ; from force field angle definitions
C5B C4B H4B ga_25 ; from PHE C-C-H angle
C9B C4B H4B ga_25 ; from PHE C-C-H angle
C6B C7B H7B ga_25 ; from PHE C-C-H angle
C8B C7B H7B ga_25 ; from PHE C-C-H angle
N1B C2B H2B ga_36 ; from ADE N-C-H angle
N3B C2B H2B ga_36 ; from ADE N-C-H angle
C9 C10 H10 ga_25 ; corrin ring C-C10-H angle
C11 C10 H10 ga_20 ; corrin ring C-C10-H angle
[ impropers ]
; ai aj ak al gromos type
C1R C8B C2B N1B gi_1 ; dimethylbenzimidazole improper for planarity
N1B C8B C9B N3B gi_1 ; dimethylbenzimidazole improper for planarity
C8B N1B C7B C9B gi_1 ; dimethylbenzimidazole improper for planarity
C8B N1B C2B N3B gi_1 ; dimethylbenzimidazole improper for planarity
C8B C7B C6B C5B gi_1 ; dimethylbenzimidazole improper for planarity
C8B C9B N3B C2B gi_1 ; dimethylbenzimidazole improper for planarity
C7B C8B C9B C4B gi_1 ; dimethylbenzimidazole improper for planarity
C7B C6B C5B C4B gi_1 ; dimethylbenzimidazole improper for planarity
C6B C5B C4B C9B gi_1 ; dimethylbenzimidazole improper for planarity
C5B C4B C9B C8B gi_1 ; dimethylbenzimidazole improper for planarity
C9B C8B C7B C6B gi_1 ; dimethylbenzimidazole improper for planarity
C9B C4B N3B C8B gi_1 ; dimethylbenzimidazole improper for planarity
C9B N3B C2B N1B gi_1 ; dimethylbenzimidazole improper for planarity
C2B N1B C8B C9B gi_1 ; dimethylbenzimidazole improper for planarity
C5M C4B C6B C5B gi_1 ; dimethylbenzimidazole methyl groups
C6M C7B C5B C6B gi_1 ; dimethylbenzimidazole methyl groups
C2B N1B N3B H2B gi_1 ; dimethylbenzimidazole H atom-containing planarity
C4B C9B C5B H4B gi_1 ; dimethylbenzimidazole H atom-containing planarity
C7B C8B C6B H7B gi_1 ; dimethylbenzimidazole H atom-containing planarity
N3B FE C2B C9B gi_1 ; Fe-dimethylbenzimidazole planarity
N21 C4 C5 C6 gi_1 ; HEMC-based conjugated corrin ring improper planarity
N22 C6 C5 C4 gi_1 ; HEMC-based conjugated corrin ring improper planarity
N22 C9 C10 C11 gi_1 ; HEMC-based conjugated corrin ring improper planarity
N23 C11 C10 C9 gi_1 ; HEMC-based conjugated corrin ring improper planarity
N23 C14 C15 C16 gi_1 ; HEMC-based conjugated corrin ring improper planarity
N24 C16 C15 C14 gi_1 ; HEMC-based conjugated corrin ring improper planarity
C5 C4 C6 C35 gi_1 ; corrin ring on-Csp2 methyl group improper planarity
C15 C16 C14 C53 gi_1 ; corrin ring on-Csp2 methyl group improper planarity
C27 O28 N29 C26 gi_1 ; from GLN improper torsion definition
N29 HAE HAD C27 gi_1 ; from GLN improper torsion definition
C32 O34 N33 C31 gi_1 ; from GLN improper torsion definition
N33 HAG HAF C32 gi_1 ; from GLN improper torsion definition
C38 O39 N40 C37 gi_1 ; from GLN improper torsion definition
N40 HAI HAH C38 gi_1 ; from GLN improper torsion definition
C43 O44 N45 C42 gi_1 ; from GLN improper torsion definition
N45 HAK HAJ C43 gi_1 ; from GLN improper torsion definition
C50 O51 N52 C49 gi_1 ; from GLN improper torsion definition
N52 HAM HAL C50 gi_1 ; from GLN improper torsion definition
C61 O63 N62 C60 gi_1 ; from GLN improper torsion definition
N62 HAO HAN C61 gi_1 ; from GLN improper torsion definition
C57 C56 O58 N59 gi_1 ; amide linkage C57 planarity
N59 C57 C1P HAC gi_1 ; amide linkage N59 planarity
C4 N21 C3 C5 gi_1 ; corrin ring C sp2 planarity
C5 C4 C6 C35 gi_1 ; corrin ring C sp2 planarity
C6 N22 C5 C7 gi_1 ; corrin ring C sp2 planarity
C9 N22 C10 C8 gi_1 ; corrin ring C sp2 planarity
C11 N23 C10 C12 gi_1 ; corrin ring C sp2 planarity
C14 N23 C15 C13 gi_1 ; corrin ring C sp2 planarity
C15 C14 C16 C53 gi_1 ; corrin ring C sp2 planarity
C16 N24 C15 C17 gi_1 ; corrin ring C sp2 planarity
C10 C9 C11 H10 gi_1 ; corrin ring C10 planarity
C18 C17 C19 C60 gi_2 ; corrin ring C atom sp3 tetrahedral geometry
C19 N24 C18 C1 gi_2 ; corrin ring C atom sp3 tetrahedral geometry
C3 C2 C30 C4 gi_2 ; corrin ring C atom sp3 tetrahedral geometry
C8 C9 C7 C41 gi_2 ; corrin ring C atom sp3 tetrahedral geometry
C13 C14 C12 C48 gi_2 ; corrin ring C atom sp3 tetrahedral geometry
C2P C1P O3 C3P gi_2 ; corrin ring C atom sp3 tetrahedral geometry
C1R N1B C2R O6R gi_2 ; sugar C atom tetrahedral geometry
C2R O7R C3R C1R gi_2 ; sugar C atom tetrahedral geometry
C3R C5R O6R C4R gi_2 ; sugar C atom tetrahedral geometry
C3R C2R O2 C4R gi_2 ; sugar C atom tetrahedral geometry
FE C1 C4 N21 gi_3 ; HEMC improper definition
FE C6 C9 N22 gi_3 ; HEMC improper definition
FE C11 C14 N23 gi_3 ; HEMC improper definition

```



Supplementary Material (ESI) for Molecular BioSystems  
This journal is (c) The Royal Society of Chemistry, 2010

```

FE      C16      C19      N24      gi_3      ; HEMC improper definition
[ dihedrals ]
; ai      aj      ak      al      gromos type
C3R      O2      P      O3      gd_20      ; from ADE phosphate definition
C3R      O2      P      O3      gd_27      ; from ADE phosphate definition
C2P      O3      P      O2      gd_20      ; from ADE phosphate definition
C2P      O3      P      O2      gd_27      ; from ADE phosphate definition
P         O3      C2P     C1P     gd_7      ; from ADE phosphate definition
C2R      C3R      O2      P      gd_29      ; from ADE phosphate definition
O8R      C5R      C4R      O6R     gd_8      ; from ADE sugar dihedrals
O8R      C5R      C4R      O6R     gd_25      ; from ADE sugar dihedrals
O8R      C5R      C4R      C3R     gd_17      ; from ADE sugar dihedrals
O8R      C5R      C4R      C3R     gd_34      ; from ADE sugar dihedrals
C3R      C4R      O6R      C1R     gd_29      ; from ADE sugar dihedrals
C5R      C4R      C3R      C2R     gd_34      ; from ADE sugar dihedrals
C5R      C4R      C3R      O2      gd_17      ; from ADE sugar dihedrals
O6R      C4R      C3R      C2R     gd_17      ; from ADE sugar dihedrals
O6R      C4R      C3R      O2      gd_18      ; from ADE sugar dihedrals
C4R      O6R      C1R      C2R     gd_29      ; from ADE sugar dihedrals
O6R      C1R      C2R      O7R     gd_18      ; from ADE sugar dihedrals
O6R      C1R      C2R      C3R     gd_17      ; from ADE sugar dihedrals
O6R      C1R      C2R      C3R     gd_34      ; from ADE sugar dihedrals
C1R      C2R      C3R      C4R     gd_34      ; from ADE sugar dihedrals
C1R      C2R      C3R      O2      gd_17      ; from ADE sugar dihedrals
O7R      C2R      C3R      C4R     gd_17      ; from ADE sugar dihedrals
O7R      C2R      C3R      O2      gd_18      ; from ADE sugar dihedrals
C1R      C2R      O7R      HAA     gd_23      ; from ADE sugar dihedrals
N1B      C1R      C2R      O7R     gd_17      ; from ADE sugar dihedrals
O6R      C1R      N1B      C8B     gd_16      ; from ADE sugar dihedrals
C4R      C5R      O8R      HAB     gd_2      ; additional ADE-based sugar dihedral
N1B      C1R      C2R      C3R     gd_17      ; additional ADE-based sugar dihedral
N1B      C1R      O6R      C4R     gd_17      ; additional ADE-based sugar dihedral
C2       C26      C27      N29     gd_40      ; from GLN dihedral
C26      C27      N29      HAD     gd_14      ; from GLN dihedral
C30      C31      C32      N33     gd_40      ; from GLN dihedral
C31      C32      N33      HAF     gd_14      ; from GLN dihedral
C7       C37      C38      N40     gd_40      ; from GLN dihedral
C37      C38      N40      HAH     gd_14      ; from GLN dihedral
C41      C42      C43      N45     gd_40      ; from GLN dihedral
C42      C43      N45      HAJ     gd_14      ; from GLN dihedral
C48      C49      C50      N52     gd_40      ; from GLN dihedral
C49      C50      N52      HAL     gd_14      ; from GLN dihedral
C18      C60      C61      N62     gd_40      ; from GLN dihedral
C60      C61      N62      HAN     gd_14      ; from GLN dihedral
C5M      C5B      C6B      C6M     gd_33      ; dimethylbenzimidazole methyl dihedral fix
C4B      C5B      C6B      C6M     gd_10      ; dimethylbenzimidazole methyl dihedral fix
C8B      C7B      C6B      C6M     gd_10      ; dimethylbenzimidazole methyl dihedral fix
C7B      C6B      C5B      C5M     gd_10      ; dimethylbenzimidazole methyl dihedral fix
C9B      C4B      C5B      C5M     gd_10      ; dimethylbenzimidazole methyl dihedral fix
C35      C5       C4       N21     gd_10      ; corrin ring methyl planarity
C35      C5       C6       N22     gd_10      ; corrin ring methyl planarity
C53      C15      C14      N23     gd_10      ; corrin ring methyl planarity
C53      C1       C16      N24     gd_10      ; corrin ring methyl planarity
N24      C19      C1       N21     gd_34      ; corrin ring but HEMC-derived N,C torsions
N24      C19      C1       N21     gd_34      ; corrin ring but HEMC-derived N,C torsions
N21      C4       C5       C6       gd_15      ; corrin ring but HEMC-derived N,C torsions
C4       C5       C6       N22     gd_15      ; corrin ring but HEMC-derived N,C torsions
N22      C9       C10      C11     gd_15      ; corrin ring but HEMC-derived N,C torsions
C9       C10      C11      N23     gd_15      ; corrin ring but HEMC-derived N,C torsions
N23      C14      C15      C16     gd_15      ; corrin ring but HEMC-derived N,C torsions
C14      C15      C16      N24     gd_15      ; corrin ring but HEMC-derived N,C torsions
C1       C2       C26      C27     gd_40      ; corrin ring HEMC derived CHn torsions
C25      C2       C26      C27     gd_34      ; corrin ring HEMC derived CHn torsions
C2       C26      C27      O28     gd_34      ; corrin ring HEMC derived CHn torsions
C2       C3       C30      C31     gd_9       ; corrin ring HEMC derived CHn torsions
C3       C30      C31      C32     gd_40      ; corrin ring HEMC derived CHn torsions
C30      C31      C32      O34     gd_40      ; corrin ring HEMC derived CHn torsions
C6       C7       C37      C38     gd_40      ; corrin ring HEMC derived CHn torsions
C36      C7       C37      C38     gd_40      ; corrin ring HEMC derived CHn torsions
C7       C37      C38      O39     gd_40      ; corrin ring HEMC derived CHn torsions
C7       C8       C41      C42     gd_9       ; corrin ring HEMC derived CHn torsions
C8       C41      C42      C43     gd_34      ; corrin ring HEMC derived CHn torsions
C41      C42      C43      O44     gd_40      ; corrin ring HEMC derived CHn torsions
C12      C13      C48      C49     gd_9       ; corrin ring HEMC derived CHn torsions
C13      C48      C49      C50     gd_34      ; corrin ring HEMC derived CHn torsions
C48      C49      C50      O51     gd_40      ; corrin ring HEMC derived CHn torsions
C16      C17      C55      C56     gd_40      ; corrin ring HEMC derived CHn torsions
C54      C17      C56      C57     gd_40      ; corrin ring HEMC derived CHn torsions
C17      C55      C56      C57     gd_34      ; corrin ring HEMC derived CHn torsions
C55      C56      C57      O58     gd_40      ; corrin ring HEMC derived CHn torsions
C17      C18      C60      C61     gd_9       ; corrin ring HEMC derived CHn torsions

```

Supplementary Material (ESI) for Molecular BioSystems  
This journal is (c) The Royal Society of Chemistry, 2010

|     |     |     |     |       |   |                                       |
|-----|-----|-----|-----|-------|---|---------------------------------------|
| C18 | C60 | C61 | O63 | gd_34 | ; | corrin ring HEMC derived CHn torsions |
| C18 | C17 | C55 | C56 | gd_9  | ; | corrin ring HEMC derived CHn torsions |
| N59 | C1P | C2P | O3  | gd_34 | ; | amide linkage torsion terms           |
| N59 | C1P | C2P | C3P | gd_34 | ; | amide linkage torsion terms           |
| C2P | C1P | N59 | C57 | gd_34 | ; | amide linkage torsion terms           |
| C56 | C57 | N59 | C1P | gd_14 | ; | amide linkage torsion terms           |
| C55 | C56 | C57 | N59 | gd_40 | ; | amide linkage torsion terms           |
| C17 | C55 | C56 | C57 | gd_40 | ; | amide linkage torsion terms           |
| C5  | C4  | N21 | C1  | gd_14 | ; | corrin ring sp3-containing torsions   |
| C10 | C9  | N22 | C6  | gd_14 | ; | corrin ring sp3-containing torsions   |
| C5  | C6  | N22 | C9  | gd_14 | ; | corrin ring sp3-containing torsions   |
| C15 | C14 | N23 | C11 | gd_14 | ; | corrin ring sp3-containing torsions   |
| C10 | C11 | N23 | C14 | gd_14 | ; | corrin ring sp3-containing torsions   |
| C15 | C16 | N24 | C19 | gd_14 | ; | corrin ring sp3-containing torsions   |
| C4  | N21 | C1  | C2  | gd_40 | ; | corrin ring sp3-containing torsions   |
| C18 | C19 | N24 | C16 | gd_40 | ; | corrin ring sp3-containing torsions   |
| N22 | C6  | C5  | C4  | gd_33 | ; | corrin ring sp3-containing torsions   |
| N23 | C11 | C10 | C9  | gd_33 | ; | corrin ring sp3-containing torsions   |
| C19 | C18 | C17 | C55 | gd_34 | ; | corrin ring sp3-containing torsions   |
| C55 | C17 | C16 | C15 | gd_40 | ; | corrin ring sp3-containing torsions   |
| C17 | C18 | C19 | C1  | gd_34 | ; | corrin ring sp3-containing torsions   |
| C18 | C19 | C1  | C2  | gd_34 | ; | corrin ring sp3-containing torsions   |
| C17 | C16 | C15 | C14 | gd_10 | ; | corrin ring sp3-containing torsions   |
| C16 | C15 | C14 | C13 | gd_10 | ; | corrin ring sp3-containing torsions   |
| C15 | C14 | C13 | C12 | gd_40 | ; | corrin ring sp3-containing torsions   |
| C6  | C7  | C8  | C9  | gd_34 | ; | corrin ring sp3-containing torsions   |
| C8  | C7  | C6  | C5  | gd_34 | ; | corrin ring sp3-containing torsions   |
| C30 | C3  | C2  | C1  | gd_34 | ; | corrin ring sp3-containing torsions   |
| C11 | C12 | C13 | C14 | gd_34 | ; | corrin ring sp3-containing torsions   |
| C13 | C12 | C11 | C10 | gd_34 | ; | corrin ring sp3-containing torsions   |
| C10 | C9  | C8  | C7  | gd_10 | ; | corrin ring sp3-containing torsions   |
| C5  | C4  | C3  | C30 | gd_34 | ; | corrin ring sp3-containing torsions   |
| C3  | C2  | C1  | C19 | gd_34 | ; | corrin ring sp3-containing torsions   |
| C9B | N3B | FE  | N21 | gd_38 | ; | THIS IS NEW!!!                        |
| N3B | FE  | N21 | C1  | gd_38 | ; | THIS IS NEW!!!                        |
| N3B | FE  | N22 | C6  | gd_38 | ; | THIS IS NEW!!!                        |
| N3B | FE  | N23 | C11 | gd_38 | ; | THIS IS NEW!!!                        |
| N3B | FE  | N24 | C16 | gd_38 | ; | THIS IS NEW!!!                        |

Supplementary Material (ESI) for Molecular BioSystems  
This journal is (c) The Royal Society of Chemistry, 2010

```
[ LYB ]
[ atoms ]
C27 C 0.38000 0 ; from GLN residue
O28 O -0.38000 0 ; from GLN residue
N29 NT -0.83000 0 ; from GLN residue
HAE H 0.41500 0 ; from GLN residue
HAD H 0.41500 0 ; from GLN residue
C32 C 0.38000 1 ; from GLN residue
O34 O -0.38000 1 ; from GLN residue
N33 NT -0.83000 1 ; from GLN residue
HAG H 0.41500 1 ; from GLN residue
HAF H 0.41500 1 ; from GLN residue
C38 C 0.38000 2 ; from GLN residue
O39 O -0.38000 2 ; from GLN residue
N40 NT -0.83000 2 ; from GLN residue
HAI H 0.41500 2 ; from GLN residue
HAH H 0.41500 2 ; from GLN residue
C43 C 0.38000 3 ; from GLN residue
O44 O -0.38000 3 ; from GLN residue
N45 NT -0.83000 3 ; from GLN residue
HAK H 0.41500 3 ; from GLN residue
HAJ H 0.41500 3 ; from GLN residue
C50 C 0.38000 4 ; from GLN residue
O51 O -0.38000 4 ; from GLN residue
N52 NT -0.83000 4 ; from GLN residue
HAM H 0.41500 4 ; from GLN residue
HAL H 0.41500 4 ; from GLN residue
C61 C 0.38000 5 ; from GLN residue
O63 O -0.38000 5 ; from GLN residue
N62 NT -0.83000 5 ; from GLN residue
HAO H 0.41500 5 ; from GLN residue
HAN H 0.41500 5 ; from GLN residue
C20 CH3 0.00000 6 ; methyl group
C25 CH3 0.00000 7 ; methyl group
C36 CH3 0.00000 8 ; methyl group
C46 CH3 0.00000 9 ; methyl group
C47 CH3 0.00000 10 ; methyl group
C54 CH3 0.00000 11 ; methyl group
C26 CH2 0.00000 12 ; non-polar CHn fragments
C30 CH2 0.00000 13 ; non-polar CHn fragments
C31 CH2 0.00000 13 ; non-polar CHn fragments
C37 CH2 0.00000 14 ; non-polar CHn fragments
C41 CH2 0.00000 15 ; non-polar CHn fragments
C42 CH2 0.00000 15 ; non-polar CHn fragments
C48 CH2 0.00000 16 ; non-polar CHn fragments
C49 CH2 0.00000 16 ; non-polar CHn fragments
C56 CH2 0.00000 17 ; non-polar CHn fragments
C55 CH2 0.00000 17 ; non-polar CHn fragments
C60 CH2 0.00000 18 ; non-polar CHn fragments
C2R CH1 0.15000 19 ; C2*-O2*-H2* from ADE
O7R OA -0.54800 19 ; C2*-O2*-H2* from ADE
HAA H 0.39800 19 ; C2*-O2*-H2* from ADE
C1R CH1 0.20000 20 ; C1*-O4*-C4* from ADE
O6R OA -0.36000 20 ; C1*-O4*-C4* from ADE
C4R CH1 0.16000 20 ; C1*-O4*-C4* from ADE
C3R CH1 0.00000 21 ; C3* from ADE
C5R CH2 0.15000 22 ; C2*-O2*-H2* from ADE
O8R OA -0.54800 22 ; C2*-O2*-H2* from ADE
; O8R OA -0.54800 22 ; C2*-O2*-H2* from ADE ; original from B12
;
; HAB from B12 is gone in LYB, where the lysine fragment is added via CLB
; HAB H 0.39800 22 ; C2*-O2*-H2* from ADE
; HAB from B12 is gone in LYB, where the lysine fragment is added via CLB
;
P P 2.20000 23 ; PO3+O3* fragment from ADE
;
; the O2P is a special mod to the PDB file. The O2 (fine in B12) is a "special" label
; that pdb2gmx has some kind of structure prep issue with. This, like the CO to FE, is a
; by-hand hack of the PDB file (for now)
;
O2P OA -0.80000 23 ; PO3+O3* fragment from ADE
O4 OM -1.00000 23 ; PO3+O3* fragment from ADE
O5 OM -1.00000 23 ; PO3+O3* fragment from ADE
O3 OA -0.80000 23 ; PO3+O3* fragment from ADE
C2P CH1 0.35000 24 ; non-polar CHn fragment
C3P CH3 0.00000 24 ; non-polar CHn fragment
C1P CH2 0.00000 24 ; non-polar CHn fragment
N59 N -0.28000 25 ; tempered GLN fragment charges
HAC H 0.28000 25 ; tempered GLN fragment charges
C57 C 0.38000 25 ; tempered GLN fragment charges
O58 O -0.38000 25 ; tempered GLN fragment charges
```

Supplementary Material (ESI) for Molecular BioSystems  
This journal is (c) The Royal Society of Chemistry, 2010

```

C5B      C      0.00000    26 ; dimethylbenzimidazole C-CH3 group (non-polar)
C5M      CH3     0.00000    26 ; dimethylbenzimidazole C-CH3 group (non-polar)
C6B      C      0.00000    27 ; dimethylbenzimidazole C-CH3 group (non-polar)
C6M      CH3     0.00000    27 ; dimethylbenzimidazole C-CH3 group (non-polar)
C4B      C     -0.14000    28 ; dimethylbenzimidazole aromatic C-H from TRP, PHE
H4B      H      0.14000    28 ; dimethylbenzimidazole aromatic C-H from TRP, PHE
C7B      C     -0.14000    29 ; dimethylbenzimidazole aromatic C-H from TRP, PHE
H7B      H      0.14000    29 ; dimethylbenzimidazole aromatic C-H from TRP, PHE
N3B      NR     -0.55000    30 ; dimethylbenzimidazole polar aromatic NC fragment
C9B      C      0.20000    30 ; dimethylbenzimidazole polar aromatic NC fragment
N1B      NR     -0.30000    31 ; dimethylbenzimidazole polar aromatic NC fragment
C8B      C      0.20000    31 ; dimethylbenzimidazole polar aromatic NC fragment
C2B      C      0.23000    32 ; dimethylbenzimidazole aromatic C-H from TRP, PHE
H2B      H      0.23000    32 ; dimethylbenzimidazole aromatic C-H from TRP, PHE
C5       C     -0.05000    33 ; C-CH3 group (non-polar)
C35      CH3     0.00000    33 ; C-CH3 group (non-polar)
C15      C     -0.05000    34 ; C-CH3 group (non-polar)
C53      CH3     0.00000    34 ; C-CH3 group (non-polar)
FE       FE      0.62000    35 ; HEMC Fe-N group
N21      NR     -0.44000    35 ; HEMC Fe-N group
N22      NR     -0.50000    35 ; HEMC Fe-N group
N23      NR     -0.50000    35 ; HEMC Fe-N group
N24      NR     -0.44000    35 ; HEMC Fe-N group
C1       CH0     0.22000    36 ; non-polar HEMC-derived corrin atoms
C2       CH0     0.00000    36 ; non-polar HEMC-derived corrin atoms
C3       CH1     0.00000    36 ; non-polar HEMC-derived corrin atoms
C4       C       0.38000    36 ; non-polar HEMC-derived corrin atoms
C6       C       0.29000    37 ; non-polar HEMC-derived corrin atoms
C7       CH0     0.00000    37 ; non-polar HEMC-derived corrin atoms
C8       CH1     0.00000    37 ; non-polar HEMC-derived corrin atoms
C9       C       0.35000    37 ; non-polar HEMC-derived corrin atoms
C16      C       0.38000    38 ; non-polar HEMC-derived corrin atoms
C17      CH0     0.00000    38 ; non-polar HEMC-derived corrin atoms
C18      CH1     0.00000    38 ; non-polar HEMC-derived corrin atoms
C19      CH1     0.24000    38 ; non-polar HEMC-derived corrin atoms
C11      C       0.35000    39 ; non-polar HEMC-derived corrin atoms
C12      CH0     0.00000    39 ; non-polar HEMC-derived corrin atoms
C13      CH1     0.00000    39 ; non-polar HEMC-derived corrin atoms
C14      C       0.29000    39 ; non-polar HEMC-derived corrin atoms
C10      C     -0.24000    40 ; aromatic C-H from TRP, PHE
H10      H      0.14000    40 ; aromatic C-H from TRP, PHE
;
;   Since CO is not defined as an atom in GROMOSxx, CO is converted to FE and the HEME
;   values are employed. This is a workaround due for proper implementation.
;
N        N      -0.31000    41 ; standard LYS (lysine) atom information
H        H      0.31000    41 ; standard LYS (lysine) atom information
CA       CH1     0.00000    42 ; standard LYS (lysine) atom information
CB       CH2     0.00000    42 ; standard LYS (lysine) atom information
CG       CH2     0.00000    43 ; standard LYS (lysine) atom information
CD       CH2     0.00000    43 ; standard LYS (lysine) atom information
CE       CH2     0.00000    44 ; NEW CHARGE FROM B12 standard LYS (lysine) atom information
NZ       NT     -0.34000    44 ; NEW CHARGE FROM B12 standard LYS (lysine) atom information
HZ1      H      0.34000    44 ; NEW CHARGE FROM B12 standard LYS (lysine) atom information
; CE       CH2     -0.24000    44 ; standard LYS (lysine) atom information
; NZ       NT     -0.64000    44 ; standard LYS (lysine) atom information
; HZ1      H      0.44000    44 ; standard LYS (lysine) atom information
;
;   this H atom is gone, replaced by the linkage CLB atom.
;   HZ2      H      0.44000    44 ; standard LYS (lysine) atom information
;   this H atom is gone, replaced by the linkage CLB atom.
;
C        C       0.20000    45 ; NEW CHARGE FROM B12 standard LYS (lysine) atom information
O        O     -0.20000    45 ; NEW CHARGE FROM B12 standard LYS (lysine) atom information
; C        C       0.45000    45 ; standard LYS (lysine) atom information
; O        O     -0.45000    45 ; standard LYS (lysine) atom information
;
; linkage atoms (added new)
;
CLB      C       0.00000    46 ; this is the linkage carbon atom between LYS and B12
OLB      O       0.00000    46 ; this is the additional =O at the linkage position
;
[ bonds ]
; ai aj gromos type
; C26 C27 gb_27 ; from GLN fragment 0
; C27 O28 gb_5 ; from GLN
; C27 N29 gb_9 ; from GLN
; N29 HAE gb_2 ; from GLN
; N29 HAD gb_2 ; from GLN
; C31 C32 gb_27 ; from GLN fragment 1
; C32 O34 gb_5 ; from GLN

```

Supplementary Material (ESI) for Molecular BioSystems  
This journal is (c) The Royal Society of Chemistry, 2010

```

C32 N33 gb_9 ; from GLN
N33 HAG gb_2 ; from GLN
N33 HAF gb_2 ; from GLN
C37 C38 gb_27 ; from GLN fragment 2
C38 O39 gb_5 ; from GLN
C38 N40 gb_9 ; from GLN
N40 HAI gb_2 ; from GLN
N40 HAH gb_2 ; from GLN
C42 C43 gb_27 ; from GLN fragment 3
C43 O44 gb_5 ; from GLN
C43 N45 gb_9 ; from GLN
N45 HAK gb_2 ; from GLN
N45 HAJ gb_2 ; from GLN
C49 C50 gb_27 ; from GLN fragment 4
C50 O51 gb_5 ; from GLN
C50 N52 gb_9 ; from GLN
N52 HAM gb_2 ; from GLN
N52 HAL gb_2 ; from GLN
C60 C61 gb_27 ; from GLN fragment 5
C61 O63 gb_5 ; from GLN
C61 N62 gb_9 ; from GLN
N62 HAO gb_2 ; from GLN
N62 HAN gb_2 ; from GLN
FE N21 gb_35 ; FE-N bond from HEMC
FE N22 gb_35 ; FE-N bond from HEMC
FE N23 gb_35 ; FE-N bond from HEMC
FE N24 gb_35 ; FE-N bond from HEMC
FE N3B gb_37 ; FE-N3B bond from HEMC not in corrin ring
P O2P gb_28 ; from ADE phosphate
P O4 gb_24 ; from ADE phosphate
P O5 gb_24 ; from ADE phosphate
P O3 gb_28 ; from ADE phosphate
N21 C1 gb_21 ; corrin ring N-CHn bonds
N21 C4 gb_14 ; corrin ring N-C bonds
N22 C6 gb_14 ; corrin ring N-C bonds
N22 C9 gb_14 ; corrin ring N-C bonds
N23 C11 gb_14 ; corrin ring N-C bonds
N23 C14 gb_14 ; corrin ring N-C bonds
N24 C16 gb_14 ; corrin ring N-C bonds
N24 C19 gb_21 ; corrin ring N-CHn bonds
C30 C31 gb_27 ; CH2-CH2 bonds
C41 C42 gb_27 ; CH2-CH2 bonds
C48 C49 gb_27 ; CH2-CH2 bonds
C55 C56 gb_27 ; CH2-CH2 bonds
C56 C57 gb_27 ; CH2-CH2 bonds
N1B C1R gb_22 ; sugar bonds from ADE
C1R C2R gb_26 ; sugar bonds from ADE
C2R O7R gb_20 ; sugar bonds from ADE
O7R HAA gb_1 ; sugar bonds from ADE
C2R C3R gb_26 ; sugar bonds from ADE
C3R C4R gb_26 ; sugar bonds from ADE
C3R O2P gb_20 ; sugar bonds from ADE
C4R C5R gb_26 ; sugar bonds from ADE
C5R O8R gb_20 ; sugar bonds from ADE
;
; HAB is deleted from B12 for LYB O8R HAB gb_1 ; sugar bonds from ADE
;
C4R O6R gb_20 ; sugar bonds from ADE
O6R C1R gb_20 ; sugar bonds from ADE
C1P N59 gb_9 ; amide corrin - phosphate linkage
C1P C2P gb_27 ; amide corrin - phosphate linkage
C2P C3P gb_27 ; amide corrin - phosphate linkage
C2P O3 gb_20 ; amide corrin - phosphate linkage
N59 HAC gb_2 ; amide corrin - phosphate linkage
N59 C57 gb_9 ; amide corrin - phosphate linkage
C57 O58 gb_5 ; amide corrin - phosphate linkage
N1B C2B gb_10 ; dimethylbenzimidazole ring
C2B N3B gb_10 ; dimethylbenzimidazole ring
C2B H2B gb_3 ; dimethylbenzimidazole ring
N3B C9B gb_10 ; dimethylbenzimidazole ring
C9B C4B gb_16 ; dimethylbenzimidazole ring
C4B C5B gb_16 ; dimethylbenzimidazole ring
C4B H4B gb_3 ; dimethylbenzimidazole ring
C5B C6B gb_16 ; dimethylbenzimidazole ring
C5B C5M gb_27 ; dimethylbenzimidazole ring
C6B C7B gb_16 ; dimethylbenzimidazole ring
C6B C6M gb_27 ; dimethylbenzimidazole ring
C7B C8B gb_16 ; dimethylbenzimidazole ring
C7B H7B gb_3 ; dimethylbenzimidazole ring
C8B N1B gb_10 ; dimethylbenzimidazole ring
C8B C9B gb_16 ; dimethylbenzimidazole ring

```

Supplementary Material (ESI) for Molecular BioSystems  
This journal is (c) The Royal Society of Chemistry, 2010

```

C1 C20 gb_27 ; corrin ring carbon framework
C1 C2 gb_27 ; corrin ring carbon framework
C2 C3 gb_27 ; corrin ring carbon framework
C2 C25 gb_27 ; corrin ring carbon framework
C2 C26 gb_27 ; corrin ring carbon framework
C3 C4 gb_27 ; corrin ring carbon framework
C3 C30 gb_27 ; corrin ring carbon framework
C4 C5 gb_17 ; corrin ring carbon framework
C5 C6 gb_17 ; corrin ring carbon framework
C5 C35 gb_27 ; corrin ring carbon framework
C6 C7 gb_27 ; corrin ring carbon framework
C7 C8 gb_27 ; corrin ring carbon framework
C7 C37 gb_27 ; corrin ring carbon framework
C7 C36 gb_27 ; corrin ring carbon framework
C8 C9 gb_27 ; corrin ring carbon framework
C8 C41 gb_27 ; corrin ring carbon framework
C9 C10 gb_17 ; corrin ring carbon framework
C10 C11 gb_17 ; corrin ring carbon framework
C11 C12 gb_27 ; corrin ring carbon framework
C12 C46 gb_27 ; corrin ring carbon framework
C12 C47 gb_27 ; corrin ring carbon framework
C12 C13 gb_27 ; corrin ring carbon framework
C13 C14 gb_27 ; corrin ring carbon framework
C13 C48 gb_27 ; corrin ring carbon framework
C14 C15 gb_17 ; corrin ring carbon framework
C15 C16 gb_17 ; corrin ring carbon framework
C15 C53 gb_27 ; corrin ring carbon framework
C16 C17 gb_27 ; corrin ring carbon framework
C17 C18 gb_27 ; corrin ring carbon framework
C17 C54 gb_27 ; corrin ring carbon framework
C17 C55 gb_27 ; corrin ring carbon framework
C18 C19 gb_27 ; corrin ring carbon framework
C18 C60 gb_27 ; corrin ring carbon framework
C19 C1 gb_27 ; corrin ring carbon framework
C10 H10 gb_3 ; corrin ring C10-H10 bond
;
; linker bond from B12 to CLB
;
O8R CLB gb_5 ; LYS B12 linker (CLB replaces H)
;
; Lysine bond topology
;
N H gb_2 ; standard LYS (lysine)
N CA gb_21 ; standard LYS (lysine)
CA CB gb_27 ; standard LYS (lysine)
CA C gb_27 ; standard LYS (lysine)
CB CG gb_27 ; standard LYS (lysine)
CG CD gb_27 ; standard LYS (lysine)
CD CE gb_27 ; standard LYS (lysine)
CE NZ gb_21 ; standard LYS (lysine)
NZ HZ1 gb_2 ; standard LYS (lysine)
;
; this replaces the HZ2 with CLB for the B12-LYS connection
;
NZ CLB gb_9 ; standard LYS (lysine)
C O gb_5 ; standard LYS (lysine)
C +N gb_10 ; standard LYS (lysine)
;
; below is the C=O bond on the B12-LYS linkage (OLB is only connected to CLB)
;
CLB OLB gb_27 ; CLB-OLB linkage bond (previously nowhere in the structure)
[ exclusions ]
;
ai aj
FE C2
FE C3
FE C5
FE C7
FE C8
FE C10
FE C12
FE C13
FE C15
FE C17
FE C18
FE C20
N21 C25
N21 C26
N21 C30
N21 C35
N21 C6
N21 C9

```

Supplementary Material (ESI) for Molecular BioSystems  
This journal is (c) The Royal Society of Chemistry, 2010

|     |     |                                     |  |
|-----|-----|-------------------------------------|--|
| N21 | C11 |                                     |  |
| N21 | C14 |                                     |  |
| N21 | C16 |                                     |  |
| N21 | C19 |                                     |  |
| N21 | C10 |                                     |  |
| N22 | C1  |                                     |  |
| N22 | C4  |                                     |  |
| N22 | C36 |                                     |  |
| N22 | C37 |                                     |  |
| N22 | C11 |                                     |  |
| N22 | C14 |                                     |  |
| N22 | C16 |                                     |  |
| N22 | C19 |                                     |  |
| N22 | C15 |                                     |  |
| N23 | C16 |                                     |  |
| N23 | C19 |                                     |  |
| N23 | C1  |                                     |  |
| N23 | C4  |                                     |  |
| N23 | C6  |                                     |  |
| N23 | C9  |                                     |  |
| N23 | C46 |                                     |  |
| N23 | C47 |                                     |  |
| N23 | C48 |                                     |  |
| N23 | C5  |                                     |  |
| N24 | C4  |                                     |  |
| N24 | C5  |                                     |  |
| N24 | C6  |                                     |  |
| N24 | C9  |                                     |  |
| N24 | C10 |                                     |  |
| N24 | C11 |                                     |  |
| N24 | C14 |                                     |  |
| N24 | C55 |                                     |  |
| N24 | C54 |                                     |  |
| N24 | C60 |                                     |  |
| C1R | C7B |                                     |  |
| C1R | C9B |                                     |  |
| C1R | N3B |                                     |  |
| N1B | C6B |                                     |  |
| N1B | C4B |                                     |  |
| C8B | C5B |                                     |  |
| C8B | C5M |                                     |  |
| C8B | C6M |                                     |  |
| C7B | C4B |                                     |  |
| C7B | N3B |                                     |  |
| C7B | C2B |                                     |  |
| C2B | C9B |                                     |  |
| C5B | C2B |                                     |  |
| C5M | C6M |                                     |  |
| C1  | C30 | ; HEMC-based C framework exclusions |  |
| C1  | C5  | ; HEMC-based C framework exclusions |  |
| C2  | C5  | ; HEMC-based C framework exclusions |  |
| C3  | C35 | ; HEMC-based C framework exclusions |  |
| C3  | C6  | ; HEMC-based C framework exclusions |  |
| C4  | C26 | ; HEMC-based C framework exclusions |  |
| C4  | C7  | ; HEMC-based C framework exclusions |  |
| C30 | C26 | ; HEMC-based C framework exclusions |  |
| C30 | C5  | ; HEMC-based C framework exclusions |  |
| C5  | C8  | ; HEMC-based C framework exclusions |  |
| C5  | C9  | ; HEMC-based C framework exclusions |  |
| C5  | C36 | ; HEMC-based C framework exclusions |  |
| C5  | C37 | ; HEMC-based C framework exclusions |  |
| C35 | C7  | ; HEMC-based C framework exclusions |  |
| C6  | C41 | ; HEMC-based C framework exclusions |  |
| C6  | C10 | ; HEMC-based C framework exclusions |  |
| C7  | C10 | ; HEMC-based C framework exclusions |  |
| C8  | H10 | ; HEMC-based C framework exclusions |  |
| C8  | C11 | ; HEMC-based C framework exclusions |  |
| C9  | C36 | ; HEMC-based C framework exclusions |  |
| C9  | C37 | ; HEMC-based C framework exclusions |  |
| C9  | C12 | ; HEMC-based C framework exclusions |  |
| C36 | C41 | ; HEMC-based C framework exclusions |  |
| C37 | C10 | ; HEMC-based C framework exclusions |  |
| C10 | C13 | ; HEMC-based C framework exclusions |  |
| C10 | C14 | ; HEMC-based C framework exclusions |  |
| C10 | C46 | ; HEMC-based C framework exclusions |  |
| C10 | C47 | ; HEMC-based C framework exclusions |  |
| H10 | C12 | ; HEMC-based C framework exclusions |  |
| C11 | C48 | ; HEMC-based C framework exclusions |  |
| C11 | C15 | ; HEMC-based C framework exclusions |  |
| C12 | C15 | ; HEMC-based C framework exclusions |  |
| C13 | C53 | ; HEMC-based C framework exclusions |  |

Supplementary Material (ESI) for Molecular BioSystems  
This journal is (c) The Royal Society of Chemistry, 2010

```

C13 C16 ; HEMC-based C framework exclusions
C14 C46 ; HEMC-based C framework exclusions
C14 C47 ; HEMC-based C framework exclusions
C14 C17 ; HEMC-based C framework exclusions
C46 C48 ; HEMC-based C framework exclusions
C47 C48 ; HEMC-based C framework exclusions
C48 C15 ; HEMC-based C framework exclusions
C15 C18 ; HEMC-based C framework exclusions
C15 C19 ; HEMC-based C framework exclusions
C15 C54 ; HEMC-based C framework exclusions
C15 C55 ; HEMC-based C framework exclusions
C53 C17 ; HEMC-based C framework exclusions
C16 C60 ; HEMC-based C framework exclusions
C19 C54 ; HEMC-based C framework exclusions
C19 C55 ; HEMC-based C framework exclusions
C54 C60 ; HEMC-based C framework exclusions
C55 C60 ; HEMC-based C framework exclusions
[ angles ]
; ai aj ak gromos type
C2 C26 C27 ga_15 ; from GLN, fragment 1
C26 C27 O28 ga_30 ; from GLN
C26 C27 N29 ga_19 ; from GLN
O28 C27 N29 ga_33 ; from GLN
C27 N29 HAE ga_23 ; from GLN
C27 N29 HAD ga_23 ; from GLN
HAE N29 HAD ga_24 ; from GLN
C30 C31 C32 ga_15 ; from GLN, fragment 2
C31 C32 O34 ga_30 ; from GLN
C31 C32 N33 ga_19 ; from GLN
O34 C32 N33 ga_33 ; from GLN
C32 N33 HAG ga_23 ; from GLN
C32 N33 HAF ga_23 ; from GLN
HAG N33 HAF ga_24 ; from GLN
C7 C37 C38 ga_15 ; from GLN, fragment 3
C37 C38 O39 ga_30 ; from GLN
C37 C38 N40 ga_19 ; from GLN
O39 C38 N40 ga_33 ; from GLN
C38 N40 HAI ga_23 ; from GLN
C38 N40 HAH ga_23 ; from GLN
HAI N40 HAH ga_24 ; from GLN
C41 C42 C43 ga_15 ; from GLN, fragment 4
C42 C43 O44 ga_30 ; from GLN
C42 C43 N45 ga_19 ; from GLN
O44 C43 N45 ga_33 ; from GLN
C43 N45 HAK ga_23 ; from GLN
C43 N45 HAJ ga_23 ; from GLN
HAK N45 HAJ ga_24 ; from GLN
C48 C49 C50 ga_15 ; from GLN, fragment 5
C49 C50 O51 ga_30 ; from GLN
C49 C50 N52 ga_19 ; from GLN
O51 C50 N52 ga_33 ; from GLN
C50 N52 HAM ga_23 ; from GLN
C50 N52 HAL ga_23 ; from GLN
HAM N52 HAL ga_24 ; from GLN
C18 C60 C61 ga_15 ; from GLN, fragment 6
C60 C61 O63 ga_30 ; from GLN
C60 C61 N62 ga_19 ; from GLN
O63 C61 N62 ga_33 ; from GLN
C61 N62 HAO ga_23 ; from GLN
C61 N62 HAN ga_23 ; from GLN
HAO N62 HAN ga_24 ; from GLN
N21 FE N22 ga_2 ; corrin ring Fe-N angle
N21 FE N24 ga_2 ; corrin ring Fe-N angle
N22 FE N23 ga_2 ; corrin ring Fe-N angle
N23 FE N24 ga_2 ; corrin ring Fe-N angle
N21 FE N3B ga_2 ; corrin-Fe-dimethylbenzimidazole
N22 FE N3B ga_2 ; corrin-Fe-dimethylbenzimidazole
N23 FE N3B ga_2 ; corrin-Fe-dimethylbenzimidazole
N24 FE N3B ga_2 ; corrin-Fe-dimethylbenzimidazole
FE N21 C1 ga_34 ; corrin Fe-N-C angles (based on HEMC)
FE N21 C4 ga_34 ; corrin Fe-N-C angles (based on HEMC)
FE N22 C6 ga_34 ; corrin Fe-N-C angles (based on HEMC)
FE N22 C9 ga_34 ; corrin Fe-N-C angles (based on HEMC)
FE N23 C11 ga_34 ; corrin Fe-N-C angles (based on HEMC)
FE N23 C14 ga_34 ; corrin Fe-N-C angles (based on HEMC)
FE N24 C16 ga_34 ; corrin Fe-N-C angles (based on HEMC)
FE N24 C19 ga_34 ; corrin Fe-N-C angles (based on HEMC)
FE N3B C9B ga_34 ; Fe-dimethylbenzimidazole-N,C angle
FE N3B C2B ga_34 ; Fe-dimethylbenzimidazole-N,C angle
C8B N1B C2B ga_7 ; angle containing C8B, see minimization issues discussion
N1B C8B C9B ga_7 ; angle containing C8B, see minimization issues discussion

```



Supplementary Material (ESI) for Molecular BioSystems  
This journal is (c) The Royal Society of Chemistry, 2010

|     |     |     |       |                                                 |            |
|-----|-----|-----|-------|-------------------------------------------------|------------|
| C8B | C9B | N3B | ga_7  | ; angle containing C8B, see minimization issues | discussion |
| C7B | C8B | N1B | ga_39 | ; angle containing C8B, see minimization issues | discussion |
| C8B | N1B | C1R | ga_37 | ; angle containing C8B, see minimization issues | discussion |
| C4B | C9B | C8B | ga_27 | ; angle containing C8B, see minimization issues | discussion |
| C6B | C7B | C8B | ga_27 | ; angle containing C8B, see minimization issues | discussion |
| C7B | C8B | C9B | ga_27 | ; angle containing C8B, see minimization issues | discussion |
| N21 | C1  | C2  | ga_13 | ; corrin ring-specific but HEMC-derived angles  |            |
| N21 | C1  | C20 | ga_13 | ; corrin ring-specific but HEMC-derived angles  |            |
| N21 | C4  | C3  | ga_33 | ; corrin ring-specific but HEMC-derived angles  |            |
| C4  | N21 | C1  | ga_6  | ; corrin ring-specific but HEMC-derived angles  |            |
| C5  | C4  | N21 | ga_33 | ; corrin ring-specific but HEMC-derived angles  |            |
| C19 | C1  | N21 | ga_13 | ; corrin ring-specific but HEMC-derived angles  |            |
| N22 | C6  | C5  | ga_33 | ; corrin ring-specific but HEMC-derived angles  |            |
| N22 | C6  | C7  | ga_33 | ; corrin ring-specific but HEMC-derived angles  |            |
| N22 | C9  | C8  | ga_33 | ; corrin ring-specific but HEMC-derived angles  |            |
| C9  | N22 | C6  | ga_6  | ; corrin ring-specific but HEMC-derived angles  |            |
| C10 | C9  | N22 | ga_33 | ; corrin ring-specific but HEMC-derived angles  |            |
| N23 | C11 | C10 | ga_33 | ; corrin ring-specific but HEMC-derived angles  |            |
| N23 | C11 | C12 | ga_33 | ; corrin ring-specific but HEMC-derived angles  |            |
| N23 | C14 | C13 | ga_33 | ; corrin ring-specific but HEMC-derived angles  |            |
| C14 | N23 | C11 | ga_6  | ; corrin ring-specific but HEMC-derived angles  |            |
| C15 | C14 | N23 | ga_33 | ; corrin ring-specific but HEMC-derived angles  |            |
| N24 | C16 | C15 | ga_33 | ; corrin ring-specific but HEMC-derived angles  |            |
| N24 | C19 | C1  | ga_13 | ; corrin ring-specific but HEMC-derived angles  |            |
| C19 | N24 | C16 | ga_6  | ; corrin ring-specific but HEMC-derived angles  |            |
| C17 | C16 | N24 | ga_33 | ; corrin ring-specific but HEMC-derived angles  |            |
| C18 | C19 | N24 | ga_13 | ; corrin ring-specific but HEMC-derived angles  |            |
| C3R | O2P | P   | ga_26 | ; phosphate angle from ADE                      |            |
| O2P | P   | O3  | ga_5  | ; phosphate angle from ADE                      |            |
| O2P | P   | O4  | ga_14 | ; phosphate angle from ADE                      |            |
| O2P | P   | O5  | ga_14 | ; phosphate angle from ADE                      |            |
| O3  | P   | O4  | ga_14 | ; phosphate angle from ADE                      |            |
| O3  | P   | O5  | ga_14 | ; phosphate angle from ADE                      |            |
| O4  | P   | O5  | ga_29 | ; phosphate angle from ADE                      |            |
| P   | O3  | C2P | ga_26 | ; phosphate angle from ADE                      |            |
| O2P | C3R | C2R | ga_9  | ; phosphate oxygen to CHn carbons from ADE      |            |
| O2P | C3R | C4R | ga_9  | ; phosphate oxygen to CHn carbons from ADE      |            |
| O3  | C2P | C1P | ga_9  | ; phosphate oxygen to CHn carbons from ADE      |            |
| O3  | C2P | C3P | ga_9  | ; phosphate oxygen to CHn carbons from ADE      |            |
| C1  | C2  | C26 | ga_13 | ; CHn-CHn-CHn angles                            |            |
| C1  | C2  | C25 | ga_13 | ; CHn-CHn-CHn angles                            |            |
| C1  | C2  | C3  | ga_13 | ; CHn-CHn-CHn angles                            |            |
| C1  | C19 | C18 | ga_13 | ; CHn-CHn-CHn angles                            |            |
| C2  | C1  | C19 | ga_13 | ; CHn-CHn-CHn angles                            |            |
| C2  | C1  | C20 | ga_13 | ; CHn-CHn-CHn angles                            |            |
| C2  | C3  | C30 | ga_13 | ; CHn-CHn-CHn angles                            |            |
| C3  | C2  | C25 | ga_13 | ; CHn-CHn-CHn angles                            |            |
| C3  | C2  | C26 | ga_13 | ; CHn-CHn-CHn angles                            |            |
| C3  | C30 | C31 | ga_13 | ; CHn-CHn-CHn angles                            |            |
| C7  | C8  | C41 | ga_13 | ; CHn-CHn-CHn angles                            |            |
| C8  | C41 | C42 | ga_13 | ; CHn-CHn-CHn angles                            |            |
| C12 | C13 | C48 | ga_13 | ; CHn-CHn-CHn angles                            |            |
| C13 | C12 | C46 | ga_13 | ; CHn-CHn-CHn angles                            |            |
| C13 | C12 | C47 | ga_13 | ; CHn-CHn-CHn angles                            |            |
| C13 | C48 | C49 | ga_13 | ; CHn-CHn-CHn angles                            |            |
| C17 | C18 | C19 | ga_13 | ; CHn-CHn-CHn angles                            |            |
| C17 | C18 | C60 | ga_13 | ; CHn-CHn-CHn angles                            |            |
| C17 | C55 | C56 | ga_13 | ; CHn-CHn-CHn angles                            |            |
| C18 | C17 | C54 | ga_13 | ; CHn-CHn-CHn angles                            |            |
| C18 | C17 | C55 | ga_13 | ; CHn-CHn-CHn angles                            |            |
| C19 | C1  | C20 | ga_13 | ; CHn-CHn-CHn angles                            |            |
| C19 | C18 | C60 | ga_13 | ; CHn-CHn-CHn angles                            |            |
| C25 | C2  | C26 | ga_13 | ; CHn-CHn-CHn angles                            |            |
| C46 | C12 | C47 | ga_13 | ; CHn-CHn-CHn angles                            |            |
| C54 | C17 | C55 | ga_13 | ; CHn-CHn-CHn angles                            |            |
| C36 | C7  | C37 | ga_13 | ; CHn-CHn-CHn angles                            |            |
| C2  | C3  | C4  | ga_15 | ; sp3-sp3-sp2 corrin ring carbon angle          |            |
| C4  | C3  | C30 | ga_15 | ; sp3-sp3-sp2 corrin ring carbon angle          |            |
| C6  | C7  | C8  | ga_15 | ; sp3-sp3-sp2 corrin ring carbon angle          |            |
| C6  | C7  | C36 | ga_15 | ; sp3-sp3-sp2 corrin ring carbon angle          |            |
| C6  | C7  | C37 | ga_15 | ; sp3-sp3-sp2 corrin ring carbon angle          |            |
| C7  | C8  | C9  | ga_15 | ; sp3-sp3-sp2 corrin ring carbon angle          |            |
| C8  | C7  | C36 | ga_15 | ; sp3-sp3-sp2 corrin ring carbon angle          |            |
| C8  | C7  | C37 | ga_15 | ; sp3-sp3-sp2 corrin ring carbon angle          |            |
| C9  | C8  | C41 | ga_15 | ; sp3-sp3-sp2 corrin ring carbon angle          |            |
| C11 | C12 | C13 | ga_15 | ; sp3-sp3-sp2 corrin ring carbon angle          |            |
| C11 | C12 | C46 | ga_15 | ; sp3-sp3-sp2 corrin ring carbon angle          |            |
| C11 | C12 | C47 | ga_15 | ; sp3-sp3-sp2 corrin ring carbon angle          |            |
| C12 | C13 | C14 | ga_15 | ; sp3-sp3-sp2 corrin ring carbon angle          |            |
| C14 | C13 | C48 | ga_15 | ; sp3-sp3-sp2 corrin ring carbon angle          |            |
| C16 | C17 | C18 | ga_15 | ; sp3-sp3-sp2 corrin ring carbon angle          |            |

Supplementary Material (ESI) for Molecular BioSystems  
This journal is (c) The Royal Society of Chemistry, 2010

```

C16 C17 C54 ga_15 ; sp3-sp3-sp2 corrin ring carbon angle
C16 C17 C55 ga_15 ; sp3-sp3-sp2 corrin ring carbon angle
C4 C5 C6 ga_27 ; sp2-sp2-sp2 corrin ring carbon angle
C9 C10 C11 ga_27 ; sp2-sp2-sp2 corrin ring carbon angle
C14 C15 C16 ga_27 ; sp2-sp2-sp2 corrin ring carbon angle
C3 C4 C5 ga_37 ; sp3-sp2-sp2 corrin ring carbon angle
C4 C5 C35 ga_37 ; sp3-sp2-sp2 corrin ring carbon angle
C5 C6 C7 ga_37 ; sp3-sp2-sp2 corrin ring carbon angle
C6 C5 C35 ga_37 ; sp3-sp2-sp2 corrin ring carbon angle
C8 C9 C10 ga_37 ; sp3-sp2-sp2 corrin ring carbon angle
C10 C11 C12 ga_37 ; sp3-sp2-sp2 corrin ring carbon angle
C13 C14 C15 ga_37 ; sp3-sp2-sp2 corrin ring carbon angle
C14 C15 C53 ga_37 ; sp3-sp2-sp2 corrin ring carbon angle
C15 C16 C17 ga_37 ; sp3-sp2-sp2 corrin ring carbon angle
C16 C15 C53 ga_37 ; sp3-sp2-sp2 corrin ring carbon angle
C5M C5B C4B ga_37 ; sp2-sp2-methyl dimethylbenzimidazole angle
C5M C5B C6B ga_37 ; sp2-sp2-methyl dimethylbenzimidazole angle
C6M C6B C5B ga_37 ; sp2-sp2-methyl dimethylbenzimidazole angle
C6M C6B C7B ga_37 ; sp2-sp2-methyl dimethylbenzimidazole angle
C4B C5B C6B ga_27 ; Csp2-Csp2-Csp2 dimethylbenzimidazole angle
C5B C4B C9B ga_27 ; Csp2-Csp2-Csp2 dimethylbenzimidazole angle
C5B C6B C7B ga_27 ; Csp2-Csp2-Csp2 dimethylbenzimidazole angle
N1B C1R C2R ga_9 ; from ADE Nsp2-containing dimethylbenzimidazole angle
N1B C1R O6R ga_9 ; from ADE Nsp2-containing dimethylbenzimidazole angle
N1B C2B N3B ga_7 ; from ADE Nsp2-containing dimethylbenzimidazole angle
C2B N1B C1R ga_37 ; from ADE Nsp2-containing dimethylbenzimidazole angle
N3B C9B C4B ga_39 ; from ADE Nsp2-containing dimethylbenzimidazole angle
C9B N3B C2B ga_7 ; from ADE Nsp2-containing dimethylbenzimidazole angle
C1R C2R C3R ga_8 ; from ADE sugar angle
C1R C2R O7R ga_9 ; from ADE sugar angle
C1R O6R C4R ga_10 ; from ADE sugar angle
C2R C1R O6R ga_9 ; from ADE sugar angle
C2R C3R C4R ga_8 ; from ADE sugar angle
C2R O7R HAA ga_12 ; from ADE sugar angle
C3R C2R O7R ga_9 ; from ADE sugar angle
C3R C4R C5R ga_8 ; from ADE sugar angle
C3R C4R O6R ga_9 ; from ADE sugar angle
C4R C5R O8R ga_9 ; from ADE sugar angle
;
; HAB angle is gone from B12 for LYB C5R O8R HAB ga_12 ; from ADE sugar angle
;
C5R C4R O6R ga_9 ; from ADE sugar angle
C1P C2P C3P ga_13 ; amide linkage angle
C57 C56 C55 ga_13 ; amide linkage angle
C57 N59 HAC ga_23 ; from GLN angle
N59 C57 O58 ga_33 ; from GLN angle
C56 C57 N59 ga_19 ; from GLN angle
O58 C57 C56 ga_30 ; from GLN angle
C1P N59 C57 ga_31 ; from force field angle definitions
C1P N59 HAC ga_18 ; from force field angle definitions
C2P C1P N59 ga_15 ; from force field angle definitions
C5B C4B H4B ga_25 ; from PHE C-C-H angle
C9B C4B H4B ga_25 ; from PHE C-C-H angle
C6B C7B H7B ga_25 ; from PHE C-C-H angle
C8B C7B H7B ga_25 ; from PHE C-C-H angle
N1B C2B H2B ga_36 ; from ADE N-C-H angle
N3B C2B H2B ga_36 ; from ADE N-C-H angle
C9 C10 H10 ga_25 ; corrin ring C-C10-H angle
C11 C10 H10 ga_20 ; corrin ring C-C10-H angle
C5R O8R CLB ga_12 ; for LYS-B12 bridge (just replaces O8R H atom with CLB)
;
; standard Lysine angle topology
;
-C N H ga_32 ; Standard LYS (lysine)
-C N CA ga_31 ; Standard LYS (lysine)
H N CA ga_18 ; Standard LYS (lysine)
N CA CB ga_13 ; Standard LYS (lysine)
N CA C ga_13 ; Standard LYS (lysine)
CB CA C ga_13 ; Standard LYS (lysine)
CA CB CG ga_15 ; Standard LYS (lysine)
CB CG CD ga_15 ; Standard LYS (lysine)
CG CD CE ga_15 ; Standard LYS (lysine)
CD CE NZ ga_15 ; Standard LYS (lysine)
CE NZ HZ1 ga_11 ; Standard LYS (lysine)
CE NZ CLB ga_6 ; Modification from LYS (CLB from NZ H atom)
HZ1 NZ CLB ga_23 ; Modification from LYS (CLB from NZ H atom)
CA C O ga_30 ; Standard LYS (lysine)
CA C +N ga_19 ; Standard LYS (lysine)
O C +N ga_33 ; Standard LYS (lysine)
;
; additional CLB-OLB angle linkages

```

Supplementary Material (ESI) for Molecular BioSystems  
This journal is (c) The Royal Society of Chemistry, 2010

```

;
  OLB   CLB   O8R   ga_33   ; new OLB-CLB linkage angles
  OLB   CLB   NZ    ga_33   ; new OLB-CLB linkage angles
  O8R   CLB   NZ    ga_33   ; new OLB-CLB linkage angles
[ impropers ]
; ai   aj   ak   al   gromos type
C1R   C8B   C2B   N1B   gi_1   ; dimethylbenzimidazole improper for planarity
N1B   C8B   C9B   N3B   gi_1   ; dimethylbenzimidazole improper for planarity
C8B   N1B   C7B   C9B   gi_1   ; dimethylbenzimidazole improper for planarity
C8B   N1B   C2B   N3B   gi_1   ; dimethylbenzimidazole improper for planarity
C8B   C7B   C6B   C5B   gi_1   ; dimethylbenzimidazole improper for planarity
C8B   C9B   N3B   C2B   gi_1   ; dimethylbenzimidazole improper for planarity
C7B   C8B   C9B   C4B   gi_1   ; dimethylbenzimidazole improper for planarity
C7B   C6B   C5B   C4B   gi_1   ; dimethylbenzimidazole improper for planarity
C6B   C5B   C4B   C9B   gi_1   ; dimethylbenzimidazole improper for planarity
C5B   C4B   C9B   C8B   gi_1   ; dimethylbenzimidazole improper for planarity
C9B   C8B   C7B   C6B   gi_1   ; dimethylbenzimidazole improper for planarity
C9B   C4B   N3B   C8B   gi_1   ; dimethylbenzimidazole improper for planarity
C9B   N3B   C2B   N1B   gi_1   ; dimethylbenzimidazole improper for planarity
C2B   N1B   C8B   C9B   gi_1   ; dimethylbenzimidazole improper for planarity
C5M   C4B   C6B   C5B   gi_1   ; dimethylbenzimidazole methyl groups
C6M   C7B   C5B   C6B   gi_1   ; dimethylbenzimidazole methyl groups
C2B   N1B   N3B   H2B   gi_1   ; dimethylbenzimidazole H atom-containing planarity
C4B   C9B   C5B   H4B   gi_1   ; dimethylbenzimidazole H atom-containing planarity
C7B   C8B   C6B   H7B   gi_1   ; dimethylbenzimidazole H atom-containing planarity
N3B   FE   C2B   C9B   gi_1   ; Fe-dimethylbenzimidazole planarity
N21   C4   C5   C6   gi_1   ; HEMC-based conjugated corrin ring improper planarity
N22   C6   C5   C4   gi_1   ; HEMC-based conjugated corrin ring improper planarity
N22   C9   C10   C11   gi_1   ; HEMC-based conjugated corrin ring improper planarity
N23   C11   C10   C9   gi_1   ; HEMC-based conjugated corrin ring improper planarity
N23   C14   C15   C16   gi_1   ; HEMC-based conjugated corrin ring improper planarity
N24   C16   C15   C14   gi_1   ; HEMC-based conjugated corrin ring improper planarity
C5   C4   C6   C35   gi_1   ; corrin ring on-Csp2 methyl group improper planarity
C15   C16   C14   C53   gi_1   ; corrin ring on-Csp2 methyl group improper planarity
C27   O28   N29   C26   gi_1   ; from GLN improper torsion definition
N29   HAE   HAD   C27   gi_1   ; from GLN improper torsion definition
C32   O34   N33   C31   gi_1   ; from GLN improper torsion definition
N33   HAG   HAF   C32   gi_1   ; from GLN improper torsion definition
C38   O39   N40   C37   gi_1   ; from GLN improper torsion definition
N40   HAI   HAH   C38   gi_1   ; from GLN improper torsion definition
C43   O44   N45   C42   gi_1   ; from GLN improper torsion definition
N45   HAK   HAJ   C43   gi_1   ; from GLN improper torsion definition
C50   O51   N52   C49   gi_1   ; from GLN improper torsion definition
N52   HAM   HAL   C50   gi_1   ; from GLN improper torsion definition
C61   O63   N62   C60   gi_1   ; from GLN improper torsion definition
N62   HAO   HAN   C61   gi_1   ; from GLN improper torsion definition
C57   C56   O58   N59   gi_1   ; amide linkage C57 planarity
N59   C57   C1P   HAC   gi_1   ; amide linkage N59 planarity
C4   N21   C3   C5   gi_1   ; corrin ring C sp2 planarity
C5   C4   C6   C35   gi_1   ; corrin ring C sp2 planarity
C6   N22   C5   C7   gi_1   ; corrin ring C sp2 planarity
C9   N22   C10   C8   gi_1   ; corrin ring C sp2 planarity
C11   N23   C10   C12   gi_1   ; corrin ring C sp2 planarity
C14   N23   C15   C13   gi_1   ; corrin ring C sp2 planarity
C15   C14   C16   C53   gi_1   ; corrin ring C sp2 planarity
C16   N24   C15   C17   gi_1   ; corrin ring C sp2 planarity
C10   C9   C11   H10   gi_1   ; corrin ring C10 planarity
C18   C17   C19   C60   gi_2   ; corrin ring C atom sp3 tetrahedral geometry
C19   N24   C18   C1   gi_2   ; corrin ring C atom sp3 tetrahedral geometry
C3   C2   C30   C4   gi_2   ; corrin ring C atom sp3 tetrahedral geometry
C8   C9   C7   C41   gi_2   ; corrin ring C atom sp3 tetrahedral geometry
C13   C14   C12   C48   gi_2   ; corrin ring C atom sp3 tetrahedral geometry
C2P   C1P   O3   C3P   gi_2   ; corrin ring C atom sp3 tetrahedral geometry
C1R   N1B   C2R   O6R   gi_2   ; sugar C atom tetrahedral geometry
C2R   O7R   C3R   C1R   gi_2   ; sugar C atom tetrahedral geometry
C3R   C5R   O6R   C4R   gi_2   ; sugar C atom tetrahedral geometry
C3R   C2R   O2P   C4R   gi_2   ; sugar C atom tetrahedral geometry
FE   C1   C4   N21   gi_3   ; HEMC improper definition
FE   C6   C9   N22   gi_3   ; HEMC improper definition
FE   C11   C14   N23   gi_3   ; HEMC improper definition
FE   C16   C19   N24   gi_3   ; HEMC improper definition
;
; standard Lysine improper torsions
;
  N     -C    CA    H     gi_1   ; Standard LYS (lysine)
  CA    N     C     CB    gi_2   ; Standard LYS (lysine)
  C     CA    +N    O     gi_1   ; Standard LYS (lysine)
  CLB   O8R   OLB   NZ    gi_1   ; Linkage improper torsion to maintain planarity at CLB
[ dihedrals ]
; ai   aj   ak   al   gromos type
  C3R   O2P   P     O3    gd_20   ; from ADE phosphate definition

```

Supplementary Material (ESI) for Molecular BioSystems  
This journal is (c) The Royal Society of Chemistry, 2010

```

C3R  O2P  P    O3  gd_27 ; from ADE phosphate definition
C2P  O3    P    O2P gd_20 ; from ADE phosphate definition
C2P  O3    P    O2P gd_27 ; from ADE phosphate definition
P    O3    C2P  C1P  gd_7  ; from ADE phosphate definition
C2R  C3R  O2P  P    gd_29 ; from ADE phosphate definition
O8R  C5R  C4R  O6R  gd_8  ; from ADE sugar dihedrals
O8R  C5R  C4R  O6R  gd_25 ; from ADE sugar dihedrals
O8R  C5R  C4R  C3R  gd_17 ; from ADE sugar dihedrals
O8R  C5R  C4R  C3R  gd_34 ; from ADE sugar dihedrals
C3R  C4R  O6R  C1R  gd_29 ; from ADE sugar dihedrals
C5R  C4R  C3R  C2R  gd_34 ; from ADE sugar dihedrals
C5R  C4R  C3R  O2P  gd_17 ; from ADE sugar dihedrals
O6R  C4R  C3R  C2R  gd_17 ; from ADE sugar dihedrals
O6R  C4R  C3R  O2P  gd_18 ; from ADE sugar dihedrals
C4R  O6R  C1R  C2R  gd_29 ; from ADE sugar dihedrals
O6R  C1R  C2R  O7R  gd_18 ; from ADE sugar dihedrals
O6R  C1R  C2R  C3R  gd_17 ; from ADE sugar dihedrals
O6R  C1R  C2R  C3R  gd_34 ; from ADE sugar dihedrals
C1R  C2R  C3R  C4R  gd_34 ; from ADE sugar dihedrals
C1R  C2R  C3R  O2P  gd_17 ; from ADE sugar dihedrals
O7R  C2R  C3R  C4R  gd_17 ; from ADE sugar dihedrals
O7R  C2R  C3R  O2P  gd_18 ; from ADE sugar dihedrals
C1R  C2R  O7R  HAA  gd_23 ; from ADE sugar dihedrals
N1B  C1R  C2R  O7R  gd_17 ; from ADE sugar dihedrals
O6R  C1R  N1B  C8B  gd_16 ; from ADE sugar dihedrals
;
; HAB-based torsion gone for LYB C4R C5R O8R HAB gd_2 ; additional ADE-based sugar dihedral
;
N1B  C1R  C2R  C3R  gd_17 ; additional ADE-based sugar dihedral
N1B  C1R  O6R  C4R  gd_17 ; additional ADE-based sugar dihedral
C2  C26  C27  N29  gd_40 ; from GLN dihedral
C26  C27  N29  HAD  gd_14 ; from GLN dihedral
C30  C31  C32  N33  gd_40 ; from GLN dihedral
C31  C32  N33  HAF  gd_14 ; from GLN dihedral
C7  C37  C38  N40  gd_40 ; from GLN dihedral
C37  C38  N40  HAH  gd_14 ; from GLN dihedral
C41  C42  C43  N45  gd_40 ; from GLN dihedral
C42  C43  N45  HAJ  gd_14 ; from GLN dihedral
C48  C49  C50  N52  gd_40 ; from GLN dihedral
C49  C50  N52  HAL  gd_14 ; from GLN dihedral
C18  C60  C61  N62  gd_40 ; from GLN dihedral
C60  C61  N62  HAN  gd_14 ; from GLN dihedral
C5M  C5B  C6B  C6M  gd_33 ; dimethylbenzimidazole methyl dihedral fix
C4B  C5B  C6B  C6M  gd_10 ; dimethylbenzimidazole methyl dihedral fix
C8B  C7B  C6B  C6M  gd_10 ; dimethylbenzimidazole methyl dihedral fix
C7B  C6B  C5B  C5M  gd_10 ; dimethylbenzimidazole methyl dihedral fix
C9B  C4B  C5B  C5M  gd_10 ; dimethylbenzimidazole methyl dihedral fix
C35  C5  C4  N21  gd_10 ; corrin ring methyl planarity
C35  C5  C6  N22  gd_10 ; corrin ring methyl planarity
C53  C15  C14  N23  gd_10 ; corrin ring methyl planarity
C53  C1  C16  N24  gd_10 ; corrin ring methyl planarity
N24  C19  C1  N21  gd_34 ; corrin ring but HEMC-derived N,C torsions
N24  C19  C1  N21  gd_34 ; corrin ring but HEMC-derived N,C torsions
N21  C4  C5  C6  gd_15 ; corrin ring but HEMC-derived N,C torsions
C4  C5  C6  N22  gd_15 ; corrin ring but HEMC-derived N,C torsions
N22  C9  C10  C11  gd_15 ; corrin ring but HEMC-derived N,C torsions
C9  C10  C11  N23  gd_15 ; corrin ring but HEMC-derived N,C torsions
N23  C14  C15  C16  gd_15 ; corrin ring but HEMC-derived N,C torsions
C14  C15  C16  N24  gd_15 ; corrin ring but HEMC-derived N,C torsions
C1  C2  C26  C27  gd_40 ; corrin ring HEMC derived CHn torsions
C25  C2  C26  C27  gd_34 ; corrin ring HEMC derived CHn torsions
C2  C26  C27  O28  gd_34 ; corrin ring HEMC derived CHn torsions
C2  C3  C30  C31  gd_9  ; corrin ring HEMC derived CHn torsions
C3  C30  C31  C32  gd_40 ; corrin ring HEMC derived CHn torsions
C30  C31  C32  O34  gd_40 ; corrin ring HEMC derived CHn torsions
C6  C7  C37  C38  gd_40 ; corrin ring HEMC derived CHn torsions
C36  C7  C37  C38  gd_40 ; corrin ring HEMC derived CHn torsions
C7  C37  C38  O39  gd_40 ; corrin ring HEMC derived CHn torsions
C7  C8  C41  C42  gd_9  ; corrin ring HEMC derived CHn torsions
C8  C41  C42  C43  gd_34 ; corrin ring HEMC derived CHn torsions
C41  C42  C43  O44  gd_40 ; corrin ring HEMC derived CHn torsions
C12  C13  C48  C49  gd_9  ; corrin ring HEMC derived CHn torsions
C13  C48  C49  C50  gd_34 ; corrin ring HEMC derived CHn torsions
C48  C49  C50  O51  gd_40 ; corrin ring HEMC derived CHn torsions
C16  C17  C55  C56  gd_40 ; corrin ring HEMC derived CHn torsions
C54  C17  C56  C57  gd_40 ; corrin ring HEMC derived CHn torsions
C17  C55  C56  C57  gd_34 ; corrin ring HEMC derived CHn torsions
C55  C56  C57  O58  gd_40 ; corrin ring HEMC derived CHn torsions
C17  C18  C60  C61  gd_9  ; corrin ring HEMC derived CHn torsions
C18  C60  C61  O63  gd_34 ; corrin ring HEMC derived CHn torsions
C18  C17  C55  C56  gd_9  ; corrin ring HEMC derived CHn torsions

```

Supplementary Material (ESI) for Molecular BioSystems  
This journal is (c) The Royal Society of Chemistry, 2010

```

N59 C1P C2P O3 gd_34 ; amide linkage torsion terms
N59 C1P C2P C3P gd_34 ; amide linkage torsion terms
C2P C1P N59 C57 gd_34 ; amide linkage torsion terms
C56 C57 N59 C1P gd_14 ; amide linkage torsion terms
C55 C56 C57 N59 gd_40 ; amide linkage torsion terms
C17 C55 C56 C57 gd_40 ; amide linkage torsion terms
C5 C4 N21 C1 gd_14 ; corrin ring sp3-containing torsions
C10 C9 N22 C6 gd_14 ; corrin ring sp3-containing torsions
C5 C6 N22 C9 gd_14 ; corrin ring sp3-containing torsions
C15 C14 N23 C11 gd_14 ; corrin ring sp3-containing torsions
C10 C11 N23 C14 gd_14 ; corrin ring sp3-containing torsions
C15 C16 N24 C19 gd_14 ; corrin ring sp3-containing torsions
C4 N21 C1 C2 gd_40 ; corrin ring sp3-containing torsions
C18 C19 N24 C16 gd_40 ; corrin ring sp3-containing torsions
N22 C6 C5 C4 gd_33 ; corrin ring sp3-containing torsions
N23 C11 C10 C9 gd_33 ; corrin ring sp3-containing torsions
C19 C18 C17 C55 gd_34 ; corrin ring sp3-containing torsions
C55 C17 C16 C15 gd_40 ; corrin ring sp3-containing torsions
C17 C18 C19 C1 gd_34 ; corrin ring sp3-containing torsions
C18 C19 C1 C2 gd_34 ; corrin ring sp3-containing torsions
C17 C16 C15 C14 gd_10 ; corrin ring sp3-containing torsions
C16 C15 C14 C13 gd_10 ; corrin ring sp3-containing torsions
C15 C14 C13 C12 gd_40 ; corrin ring sp3-containing torsions
C6 C7 C8 C9 gd_34 ; corrin ring sp3-containing torsions
C8 C7 C6 C5 gd_34 ; corrin ring sp3-containing torsions
C30 C3 C2 C1 gd_34 ; corrin ring sp3-containing torsions
C11 C12 C13 C14 gd_34 ; corrin ring sp3-containing torsions
C13 C12 C11 C10 gd_34 ; corrin ring sp3-containing torsions
C10 C9 C8 C7 gd_10 ; corrin ring sp3-containing torsions
C5 C4 C3 C30 gd_34 ; corrin ring sp3-containing torsions
C3 C2 C1 C19 gd_34 ; corrin ring sp3-containing torsions
;
; standard Lysine torsion topology
;
-CA -C N CA gd_14 ; Standard LYS (lysine)
-C N CA C gd_39 ; Standard LYS (lysine)
N CA CB CG gd_34 ; Standard LYS (lysine)
N CA C +N gd_40 ; Standard LYS (lysine)
CA CB CG CD gd_34 ; Standard LYS (lysine)
CB CG CD CE gd_34 ; Standard LYS (lysine)
CG CD CE NZ gd_34 ; Standard LYS (lysine)
CD CE NZ HZ1 gd_29 ; Standard LYS (lysine)
C4R C5R O8R CLB gd_23 ; LYS-B12 linkage dihedral terms
C5R O8R CLB OLB gd_12 ; LYS-B12 linkage dihedral terms
O8R CLB NZ CE gd_14 ; LYS-B12 linkage dihedral terms
OLB CLB NZ CE gd_14 ; LYS-B12 linkage dihedral terms
C9B N3B FE N21 gd_38 ; THIS IS NEW!!!
N3B FE N21 C1 gd_38 ; THIS IS NEW!!!
N3B FE N22 C6 gd_38 ; THIS IS NEW!!!
N3B FE N23 C11 gd_38 ; THIS IS NEW!!!
N3B FE N24 C16 gd_38 ; THIS IS NEW!!!
;
; Use of LYB, which employs the pdb2gmx method for sewing the peptide chain together,
; requires the addition of this very new, bulky amino acid to aminoacids.dat.

```

Supplementary Material (ESI) for Molecular BioSystems  
This journal is (c) The Royal Society of Chemistry, 2010

```
[ BCN ]
;
; cyanocobalamin based on the HEMC CO parameters
;
[ atoms ]
C27 C 0.38000 0 ; from GLN residue
O28 O -0.38000 0 ; from GLN residue
N29 NT -0.83000 0 ; from GLN residue
HAE H 0.41500 0 ; from GLN residue
HAD H 0.41500 0 ; from GLN residue
C32 C 0.38000 1 ; from GLN residue
O34 O -0.38000 1 ; from GLN residue
N33 NT -0.83000 1 ; from GLN residue
HAG H 0.41500 1 ; from GLN residue
HAF H 0.41500 1 ; from GLN residue
C38 C 0.38000 2 ; from GLN residue
O39 O -0.38000 2 ; from GLN residue
N40 NT -0.83000 2 ; from GLN residue
HAI H 0.41500 2 ; from GLN residue
HAH H 0.41500 2 ; from GLN residue
C43 C 0.38000 3 ; from GLN residue
O44 O -0.38000 3 ; from GLN residue
N45 NT -0.83000 3 ; from GLN residue
HAK H 0.41500 3 ; from GLN residue
HAJ H 0.41500 3 ; from GLN residue
C50 C 0.38000 4 ; from GLN residue
O51 O -0.38000 4 ; from GLN residue
N52 NT -0.83000 4 ; from GLN residue
HAM H 0.41500 4 ; from GLN residue
HAL H 0.41500 4 ; from GLN residue
C61 C 0.38000 5 ; from GLN residue
O63 O -0.38000 5 ; from GLN residue
N62 NT -0.83000 5 ; from GLN residue
HAO H 0.41500 5 ; from GLN residue
HAN H 0.41500 5 ; from GLN residue
C20 CH3 0.00000 6 ; methyl group
C25 CH3 0.00000 7 ; methyl group
C36 CH3 0.00000 8 ; methyl group
C46 CH3 0.00000 9 ; methyl group
C47 CH3 0.00000 10 ; methyl group
C54 CH3 0.00000 11 ; methyl group
C26 CH2 0.00000 12 ; non-polar CHn fragments
C30 CH2 0.00000 13 ; non-polar CHn fragments
C31 CH2 0.00000 13 ; non-polar CHn fragments
C37 CH2 0.00000 14 ; non-polar CHn fragments
C41 CH2 0.00000 15 ; non-polar CHn fragments
C42 CH2 0.00000 15 ; non-polar CHn fragments
C48 CH2 0.00000 16 ; non-polar CHn fragments
C49 CH2 0.00000 16 ; non-polar CHn fragments
C56 CH2 0.00000 17 ; non-polar CHn fragments
C55 CH2 0.00000 17 ; non-polar CHn fragments
C60 CH2 0.00000 18 ; non-polar CHn fragments
C2R CH1 0.15000 19 ; C2*-O2*-H2* from ADE
O7R OA -0.54800 19 ; C2*-O2*-H2* from ADE
HAA H 0.39800 19 ; C2*-O2*-H2* from ADE
C1R CH1 0.20000 20 ; C1*-O4*-C4* from ADE
O6R OA -0.36000 20 ; C1*-O4*-C4* from ADE
C4R CH1 0.16000 20 ; C1*-O4*-C4* from ADE
C3R CH1 0.00000 21 ; C3* from ADE
C5R CH2 0.15000 22 ; C2*-O2*-H2* from ADE
O8R OA -0.54800 22 ; C2*-O2*-H2* from ADE
HAB H 0.39800 22 ; C2*-O2*-H2* from ADE
P P 2.20000 23 ; PO3+O3* fragment from ADE
O2 OA -0.80000 23 ; PO3+O3* fragment from ADE
O4 OM -1.00000 23 ; PO3+O3* fragment from ADE
O5 OM -1.00000 23 ; PO3+O3* fragment from ADE
O3 OA -0.80000 23 ; PO3+O3* fragment from ADE
C2P CH1 0.35000 24 ; non-polar CHn fragment
C3P CH3 0.00000 24 ; non-polar CHn fragment
C1P CH2 0.00000 24 ; non-polar CHn fragment
N59 N -0.28000 25 ; tempered GLN fragment charges
HAC H 0.28000 25 ; tempered GLN fragment charges
C57 C 0.38000 25 ; tempered GLN fragment charges
O58 O -0.38000 25 ; tempered GLN fragment charges
C5B C 0.00000 26 ; dimethylbenzimidazole C-CH3 group (non-polar)
C5M CH3 0.00000 26 ; dimethylbenzimidazole C-CH3 group (non-polar)
C6B C 0.00000 27 ; dimethylbenzimidazole C-CH3 group (non-polar)
C6M CH3 0.00000 27 ; dimethylbenzimidazole C-CH3 group (non-polar)
C4B C -0.14000 28 ; dimethylbenzimidazole aromatic C-H from TRP, PHE
H4B H 0.14000 28 ; dimethylbenzimidazole aromatic C-H from TRP, PHE
C7B C -0.14000 29 ; dimethylbenzimidazole aromatic C-H from TRP, PHE
```

Supplementary Material (ESI) for Molecular BioSystems  
This journal is (c) The Royal Society of Chemistry, 2010

```

H7B      H      0.14000    29 ; dimethylbenzimidazole aromatic C-H from TRP, PHE
N3B      NR     -0.55000    30 ; dimethylbenzimidazole polar aromatic NC fragment
C9B      C      0.20000    30 ; dimethylbenzimidazole polar aromatic NC fragment
N1B      NR     -0.30000    31 ; dimethylbenzimidazole polar aromatic NC fragment
C8B      C      0.20000    31 ; dimethylbenzimidazole polar aromatic NC fragment
C2B      C      0.23000    32 ; dimethylbenzimidazole aromatic C-H from TRP, PHE
H2B      H      0.23000    32 ; dimethylbenzimidazole aromatic C-H from TRP, PHE
C5       C      -0.05000    33 ; C-CH3 group (non-polar)
C35      CH3     0.00000    33 ; C-CH3 group (non-polar)
C15      C      -0.05000    34 ; C-CH3 group (non-polar)
C53      CH3     0.00000    34 ; C-CH3 group (non-polar)
FE       FE      1.00000    35 ; HEMC Fe-N group
N21      NR     -0.44000    35 ; HEMC Fe-N group
N22      NR     -0.50000    35 ; HEMC Fe-N group
N23      NR     -0.50000    35 ; HEMC Fe-N group
N24      NR     -0.44000    35 ; HEMC Fe-N group
C1       CH0     0.22000    36 ; non-polar HEMC-derived corrin atoms
C2       CH0     0.00000    36 ; non-polar HEMC-derived corrin atoms
C3       CH1     0.00000    36 ; non-polar HEMC-derived corrin atoms
C4       C       0.38000    36 ; non-polar HEMC-derived corrin atoms
C6       C       0.29000    37 ; non-polar HEMC-derived corrin atoms
C7       CH0     0.00000    37 ; non-polar HEMC-derived corrin atoms
C8       CH1     0.00000    37 ; non-polar HEMC-derived corrin atoms
C9       C       0.35000    37 ; non-polar HEMC-derived corrin atoms
C16      C       0.38000    38 ; non-polar HEMC-derived corrin atoms
C17      CH0     0.00000    38 ; non-polar HEMC-derived corrin atoms
C18      CH1     0.00000    38 ; non-polar HEMC-derived corrin atoms
C19      CH1     0.24000    38 ; non-polar HEMC-derived corrin atoms
C11      C       0.35000    39 ; non-polar HEMC-derived corrin atoms
C12      CH0     0.00000    39 ; non-polar HEMC-derived corrin atoms
C13      CH1     0.00000    39 ; non-polar HEMC-derived corrin atoms
C14      C       0.29000    39 ; non-polar HEMC-derived corrin atoms
C10      C       -0.24000    40 ; aromatic C-H from TRP, PHE
H10      H       0.14000    40 ; aromatic C-H from TRP, PHE
;
; cyano group addition to the original B12 topology
;
C1N      C       0.04000    41 ; CN group on Fe
N1C      N      -0.42000    41 ; CN group on Fe
;
; Since CO is not defined as an atom in GROMOSxx, CO is converted to FE and the HEME
; values are employed. This is a workaround due for proper implementation.
;
[ bonds ]
; ai aj gromos type
C26 C27 gb_27 ; from GLN fragment 0
C27 O28 gb_5 ; from GLN
C27 N29 gb_9 ; from GLN
N29 HAE gb_2 ; from GLN
N29 HAD gb_2 ; from GLN
C31 C32 gb_27 ; from GLN fragment 1
C32 O34 gb_5 ; from GLN
C32 N33 gb_9 ; from GLN
N33 HAG gb_2 ; from GLN
N33 HAF gb_2 ; from GLN
C37 C38 gb_27 ; from GLN fragment 2
C38 O39 gb_5 ; from GLN
C38 N40 gb_9 ; from GLN
N40 HAI gb_2 ; from GLN
N40 HAH gb_2 ; from GLN
C42 C43 gb_27 ; from GLN fragment 3
C43 O44 gb_5 ; from GLN
C43 N45 gb_9 ; from GLN
N45 HAK gb_2 ; from GLN
N45 HAJ gb_2 ; from GLN
C49 C50 gb_27 ; from GLN fragment 4
C50 O51 gb_5 ; from GLN
C50 N52 gb_9 ; from GLN
N52 HAM gb_2 ; from GLN
N52 HAL gb_2 ; from GLN
C60 C61 gb_27 ; from GLN fragment 5
C61 O63 gb_5 ; from GLN
C61 N62 gb_9 ; from GLN
N62 HAO gb_2 ; from GLN
N62 HAN gb_2 ; from GLN
FE N21 gb_35 ; FE-N bond from HEMC
FE N22 gb_35 ; FE-N bond from HEMC
FE N23 gb_35 ; FE-N bond from HEMC
FE N24 gb_35 ; FE-N bond from HEMC
FE N3B gb_37 ; FE-N3B bond from HEMC not in corrin ring
P O2 gb_28 ; from ADE phosphate

```

Supplementary Material (ESI) for Molecular BioSystems  
This journal is (c) The Royal Society of Chemistry, 2010

|     |     |       |                                    |
|-----|-----|-------|------------------------------------|
| P   | O4  | gb_24 | ; from ADE phosphate               |
| P   | O5  | gb_24 | ; from ADE phosphate               |
| P   | O3  | gb_28 | ; from ADE phosphate               |
| N21 | C1  | gb_21 | ; corrin ring N-CHn bonds          |
| N21 | C4  | gb_14 | ; corrin ring N-C bonds            |
| N22 | C6  | gb_14 | ; corrin ring N-C bonds            |
| N22 | C9  | gb_14 | ; corrin ring N-C bonds            |
| N23 | C11 | gb_14 | ; corrin ring N-C bonds            |
| N23 | C14 | gb_14 | ; corrin ring N-C bonds            |
| N24 | C16 | gb_14 | ; corrin ring N-C bonds            |
| N24 | C19 | gb_21 | ; corrin ring N-CHn bonds          |
| C30 | C31 | gb_27 | ; CH2-CH2 bonds                    |
| C41 | C42 | gb_27 | ; CH2-CH2 bonds                    |
| C48 | C49 | gb_27 | ; CH2-CH2 bonds                    |
| C55 | C56 | gb_27 | ; CH2-CH2 bonds                    |
| C56 | C57 | gb_27 | ; CH2-CH2 bonds                    |
| N1B | C1R | gb_22 | ; sugar bonds from ADE             |
| C1R | C2R | gb_26 | ; sugar bonds from ADE             |
| C2R | O7R | gb_20 | ; sugar bonds from ADE             |
| O7R | HAA | gb_1  | ; sugar bonds from ADE             |
| C2R | C3R | gb_26 | ; sugar bonds from ADE             |
| C3R | C4R | gb_26 | ; sugar bonds from ADE             |
| C3R | O2  | gb_20 | ; sugar bonds from ADE             |
| C4R | C5R | gb_26 | ; sugar bonds from ADE             |
| C5R | O8R | gb_20 | ; sugar bonds from ADE             |
| O8R | HAB | gb_1  | ; sugar bonds from ADE             |
| C4R | O6R | gb_20 | ; sugar bonds from ADE             |
| O6R | C1R | gb_20 | ; sugar bonds from ADE             |
| C1P | N59 | gb_9  | ; amide corrin - phosphate linkage |
| C1P | C2P | gb_27 | ; amide corrin - phosphate linkage |
| C2P | C3P | gb_27 | ; amide corrin - phosphate linkage |
| C2P | O3  | gb_20 | ; amide corrin - phosphate linkage |
| N59 | HAC | gb_2  | ; amide corrin - phosphate linkage |
| N59 | C57 | gb_9  | ; amide corrin - phosphate linkage |
| C57 | O58 | gb_5  | ; amide corrin - phosphate linkage |
| N1B | C2B | gb_10 | ; dimethylbenzimidazole ring       |
| C2B | N3B | gb_10 | ; dimethylbenzimidazole ring       |
| C2B | H2B | gb_3  | ; dimethylbenzimidazole ring       |
| N3B | C9B | gb_10 | ; dimethylbenzimidazole ring       |
| C9B | C4B | gb_16 | ; dimethylbenzimidazole ring       |
| C4B | C5B | gb_16 | ; dimethylbenzimidazole ring       |
| C4B | H4B | gb_3  | ; dimethylbenzimidazole ring       |
| C5B | C6B | gb_16 | ; dimethylbenzimidazole ring       |
| C5B | C5M | gb_27 | ; dimethylbenzimidazole ring       |
| C6B | C7B | gb_16 | ; dimethylbenzimidazole ring       |
| C6B | C6M | gb_27 | ; dimethylbenzimidazole ring       |
| C7B | C8B | gb_16 | ; dimethylbenzimidazole ring       |
| C7B | H7B | gb_3  | ; dimethylbenzimidazole ring       |
| C8B | N1B | gb_10 | ; dimethylbenzimidazole ring       |
| C8B | C9B | gb_16 | ; dimethylbenzimidazole ring       |
| C1  | C20 | gb_27 | ; corrin ring carbon framework     |
| C1  | C2  | gb_27 | ; corrin ring carbon framework     |
| C2  | C3  | gb_27 | ; corrin ring carbon framework     |
| C2  | C25 | gb_27 | ; corrin ring carbon framework     |
| C2  | C26 | gb_27 | ; corrin ring carbon framework     |
| C3  | C4  | gb_27 | ; corrin ring carbon framework     |
| C3  | C30 | gb_27 | ; corrin ring carbon framework     |
| C4  | C5  | gb_17 | ; corrin ring carbon framework     |
| C5  | C6  | gb_17 | ; corrin ring carbon framework     |
| C5  | C35 | gb_27 | ; corrin ring carbon framework     |
| C6  | C7  | gb_27 | ; corrin ring carbon framework     |
| C7  | C8  | gb_27 | ; corrin ring carbon framework     |
| C7  | C37 | gb_27 | ; corrin ring carbon framework     |
| C7  | C36 | gb_27 | ; corrin ring carbon framework     |
| C8  | C9  | gb_27 | ; corrin ring carbon framework     |
| C8  | C41 | gb_27 | ; corrin ring carbon framework     |
| C9  | C10 | gb_17 | ; corrin ring carbon framework     |
| C10 | C11 | gb_17 | ; corrin ring carbon framework     |
| C11 | C12 | gb_27 | ; corrin ring carbon framework     |
| C12 | C46 | gb_27 | ; corrin ring carbon framework     |
| C12 | C47 | gb_27 | ; corrin ring carbon framework     |
| C12 | C13 | gb_27 | ; corrin ring carbon framework     |
| C13 | C14 | gb_27 | ; corrin ring carbon framework     |
| C13 | C48 | gb_27 | ; corrin ring carbon framework     |
| C14 | C15 | gb_17 | ; corrin ring carbon framework     |
| C15 | C16 | gb_17 | ; corrin ring carbon framework     |
| C15 | C53 | gb_27 | ; corrin ring carbon framework     |
| C16 | C17 | gb_27 | ; corrin ring carbon framework     |
| C17 | C18 | gb_27 | ; corrin ring carbon framework     |
| C17 | C54 | gb_27 | ; corrin ring carbon framework     |
| C17 | C55 | gb_27 | ; corrin ring carbon framework     |



Supplementary Material (ESI) for Molecular BioSystems  
This journal is (c) The Royal Society of Chemistry, 2010

```
C18 C19 gb_27 ; corrin ring carbon framework
C18 C60 gb_27 ; corrin ring carbon framework
C19 C1 gb_27 ; corrin ring carbon framework
C10 H10 gb_3 ; corrin ring C10-H10 bond
;
; cyano group addition to the original B12 topology
;
FE C1N gb_30 ; cyano group on the Fe
C1N N1C gb_4 ; cyano group on the Fe
[ exclusions ]
; ai aj
FE N1C ; new add
FE C1 ; new add
FE C2
FE C3
FE C5
FE C7
FE C8
FE C10
FE C12
FE C13
FE C15
FE C17
FE C18
FE C20
N21 C25
N21 C26
N21 C30
N21 C35
N21 C6
N21 C9
N21 C11
N21 C14
N21 C16
N21 C19
N21 C10
N22 C1
N22 C4
N22 C36
N22 C37
N22 C11
N22 C14
N22 C16
N22 C19
N22 C15
N23 C16
N23 C19
N23 C1
N23 C4
N23 C6
N23 C9
N23 C46
N23 C47
N23 C48
N23 C5
N24 C4
N24 C5
N24 C6
N24 C9
N24 C10
N24 C11
N24 C14
N24 C55
N24 C54
N24 C60
C1R C7B
C1R C9B
C1R N3B
N1B C6B
N1B C4B
C8B C5B
C8B C5M
C8B C6M
C7B C4B
C7B N3B
C7B C2B
C2B C9B
C5B C2B
C5M C6M
C1 C30 ; HEMC-based C framework exclusions
C1 C5 ; HEMC-based C framework exclusions
```

Supplementary Material (ESI) for Molecular BioSystems  
This journal is (c) The Royal Society of Chemistry, 2010

```

C2    C5    ; HEMC-based C framework exclusions
C3    C35   ; HEMC-based C framework exclusions
C3    C6    ; HEMC-based C framework exclusions
C4    C26   ; HEMC-based C framework exclusions
C4    C7    ; HEMC-based C framework exclusions
C30   C26   ; HEMC-based C framework exclusions
C30   C5    ; HEMC-based C framework exclusions
C5    C8    ; HEMC-based C framework exclusions
C5    C9    ; HEMC-based C framework exclusions
C5    C36   ; HEMC-based C framework exclusions
C5    C37   ; HEMC-based C framework exclusions
C35   C7    ; HEMC-based C framework exclusions
C6    C41   ; HEMC-based C framework exclusions
C6    C10   ; HEMC-based C framework exclusions
C7    C10   ; HEMC-based C framework exclusions
C8    H10   ; HEMC-based C framework exclusions
C8    C11   ; HEMC-based C framework exclusions
C9    C36   ; HEMC-based C framework exclusions
C9    C37   ; HEMC-based C framework exclusions
C9    C12   ; HEMC-based C framework exclusions
C36   C41   ; HEMC-based C framework exclusions
C37   C10   ; HEMC-based C framework exclusions
C10   C13   ; HEMC-based C framework exclusions
C10   C14   ; HEMC-based C framework exclusions
C10   C46   ; HEMC-based C framework exclusions
C10   C47   ; HEMC-based C framework exclusions
H10   C12   ; HEMC-based C framework exclusions
C11   C48   ; HEMC-based C framework exclusions
C11   C15   ; HEMC-based C framework exclusions
C12   C15   ; HEMC-based C framework exclusions
C13   C53   ; HEMC-based C framework exclusions
C13   C16   ; HEMC-based C framework exclusions
C14   C46   ; HEMC-based C framework exclusions
C14   C47   ; HEMC-based C framework exclusions
C14   C17   ; HEMC-based C framework exclusions
C46   C48   ; HEMC-based C framework exclusions
C47   C48   ; HEMC-based C framework exclusions
C48   C15   ; HEMC-based C framework exclusions
C15   C18   ; HEMC-based C framework exclusions
C15   C19   ; HEMC-based C framework exclusions
C15   C54   ; HEMC-based C framework exclusions
C15   C55   ; HEMC-based C framework exclusions
C53   C17   ; HEMC-based C framework exclusions
C16   C60   ; HEMC-based C framework exclusions
C19   C54   ; HEMC-based C framework exclusions
C19   C55   ; HEMC-based C framework exclusions
C54   C60   ; HEMC-based C framework exclusions
C55   C60   ; HEMC-based C framework exclusions
;
; cyano group addition to the original B12 topology
;
N21   N1C   ; cyano exclusions from HEMC CO group
N22   N1C   ; cyano exclusions from HEMC CO group
N23   N1C   ; cyano exclusions from HEMC CO group
N24   N1C   ; cyano exclusions from HEMC CO group
C1    C1N   ; cyano exclusions from HEMC CO group
C4    C1N   ; cyano exclusions from HEMC CO group
C6    C1N   ; cyano exclusions from HEMC CO group
C9    C1N   ; cyano exclusions from HEMC CO group
C11   C1N   ; cyano exclusions from HEMC CO group
C14   C1N   ; cyano exclusions from HEMC CO group
C16   C1N   ; cyano exclusions from HEMC CO group
C19   C1N   ; cyano exclusions from HEMC CO group
N3B   N1C   ; cyano exclusion unique to 6-coordinate iron
C1N   C9B   ; additional cyano exclusion at Fe 6-center
C1N   C2B   ; additional cyano exclusion at Fe 6-center
[ angles ]
; ai    aj    ak    gromos type
C2    C26   C27   ga_15    ; from GLN, fragment 1
C26   C27   O28   ga_30    ; from GLN
C26   C27   N29   ga_19    ; from GLN
O28   C27   N29   ga_33    ; from GLN
C27   N29   HAE   ga_23    ; from GLN
C27   N29   HAD   ga_23    ; from GLN
HAE   N29   HAD   ga_24    ; from GLN
C30   C31   C32   ga_15    ; from GLN, fragment 2
C31   C32   O34   ga_30    ; from GLN
C31   C32   N33   ga_19    ; from GLN
O34   C32   N33   ga_33    ; from GLN
C32   N33   HAG   ga_23    ; from GLN
C32   N33   HAF   ga_23    ; from GLN

```

Supplementary Material (ESI) for Molecular BioSystems  
This journal is (c) The Royal Society of Chemistry, 2010

|     |     |     |       |                                                            |
|-----|-----|-----|-------|------------------------------------------------------------|
| HAG | N33 | HAF | ga_24 | ; from GLN                                                 |
| C7  | C37 | C38 | ga_15 | ; from GLN, fragment 3                                     |
| C37 | C38 | O39 | ga_30 | ; from GLN                                                 |
| C37 | C38 | N40 | ga_19 | ; from GLN                                                 |
| O39 | C38 | N40 | ga_33 | ; from GLN                                                 |
| C38 | N40 | HAI | ga_23 | ; from GLN                                                 |
| C38 | N40 | HAH | ga_23 | ; from GLN                                                 |
| HAI | N40 | HAH | ga_24 | ; from GLN                                                 |
| C41 | C42 | C43 | ga_15 | ; from GLN, fragment 4                                     |
| C42 | C43 | O44 | ga_30 | ; from GLN                                                 |
| C42 | C43 | N45 | ga_19 | ; from GLN                                                 |
| O44 | C43 | N45 | ga_33 | ; from GLN                                                 |
| C43 | N45 | HAK | ga_23 | ; from GLN                                                 |
| C43 | N45 | HAI | ga_23 | ; from GLN                                                 |
| HAK | N45 | HAI | ga_24 | ; from GLN                                                 |
| C48 | C49 | C50 | ga_15 | ; from GLN, fragment 5                                     |
| C49 | C50 | O51 | ga_30 | ; from GLN                                                 |
| C49 | C50 | N52 | ga_19 | ; from GLN                                                 |
| O51 | C50 | N52 | ga_33 | ; from GLN                                                 |
| C50 | N52 | HAM | ga_23 | ; from GLN                                                 |
| C50 | N52 | HAL | ga_23 | ; from GLN                                                 |
| HAM | N52 | HAL | ga_24 | ; from GLN                                                 |
| C18 | C60 | C61 | ga_15 | ; from GLN, fragment 6                                     |
| C60 | C61 | O63 | ga_30 | ; from GLN                                                 |
| C60 | C61 | N62 | ga_19 | ; from GLN                                                 |
| O63 | C61 | N62 | ga_33 | ; from GLN                                                 |
| C61 | N62 | HAO | ga_23 | ; from GLN                                                 |
| C61 | N62 | HAN | ga_23 | ; from GLN                                                 |
| HAO | N62 | HAN | ga_24 | ; from GLN                                                 |
| N21 | FE  | N22 | ga_2  | ; corrin ring Fe-N angle                                   |
| N21 | FE  | N24 | ga_2  | ; corrin ring Fe-N angle                                   |
| N22 | FE  | N23 | ga_2  | ; corrin ring Fe-N angle                                   |
| N23 | FE  | N24 | ga_2  | ; corrin ring Fe-N angle                                   |
| N21 | FE  | N3B | ga_2  | ; corrin-Fe-dimethylbenzimidazole                          |
| N22 | FE  | N3B | ga_2  | ; corrin-Fe-dimethylbenzimidazole                          |
| N23 | FE  | N3B | ga_2  | ; corrin-Fe-dimethylbenzimidazole                          |
| N24 | FE  | N3B | ga_2  | ; corrin-Fe-dimethylbenzimidazole                          |
| FE  | N21 | C1  | ga_34 | ; corrin Fe-N-C angles (based on HEMC)                     |
| FE  | N21 | C4  | ga_34 | ; corrin Fe-N-C angles (based on HEMC)                     |
| FE  | N22 | C6  | ga_34 | ; corrin Fe-N-C angles (based on HEMC)                     |
| FE  | N22 | C9  | ga_34 | ; corrin Fe-N-C angles (based on HEMC)                     |
| FE  | N23 | C11 | ga_34 | ; corrin Fe-N-C angles (based on HEMC)                     |
| FE  | N23 | C14 | ga_34 | ; corrin Fe-N-C angles (based on HEMC)                     |
| FE  | N24 | C16 | ga_34 | ; corrin Fe-N-C angles (based on HEMC)                     |
| FE  | N24 | C19 | ga_34 | ; corrin Fe-N-C angles (based on HEMC)                     |
| FE  | N3B | C9B | ga_34 | ; Fe-dimethylbenzimidazole-N,C angle                       |
| FE  | N3B | C2B | ga_34 | ; Fe-dimethylbenzimidazole-N,C angle                       |
| C8B | N1B | C2B | ga_7  | ; angle containing C8B, see minimization issues discussion |
| N1B | C8B | C9B | ga_7  | ; angle containing C8B, see minimization issues discussion |
| C8B | C9B | N3B | ga_7  | ; angle containing C8B, see minimization issues discussion |
| C7B | C8B | N1B | ga_39 | ; angle containing C8B, see minimization issues discussion |
| C8B | N1B | C1R | ga_37 | ; angle containing C8B, see minimization issues discussion |
| C4B | C9B | C8B | ga_27 | ; angle containing C8B, see minimization issues discussion |
| C6B | C7B | C8B | ga_27 | ; angle containing C8B, see minimization issues discussion |
| C7B | C8B | C9B | ga_27 | ; angle containing C8B, see minimization issues discussion |
| N21 | C1  | C2  | ga_13 | ; corrin ring-specific but HEMC-derived angles             |
| N21 | C1  | C20 | ga_13 | ; corrin ring-specific but HEMC-derived angles             |
| N21 | C4  | C3  | ga_33 | ; corrin ring-specific but HEMC-derived angles             |
| C4  | N21 | C1  | ga_6  | ; corrin ring-specific but HEMC-derived angles             |
| C5  | C4  | N21 | ga_33 | ; corrin ring-specific but HEMC-derived angles             |
| C19 | C1  | N21 | ga_13 | ; corrin ring-specific but HEMC-derived angles             |
| N22 | C6  | C5  | ga_33 | ; corrin ring-specific but HEMC-derived angles             |
| N22 | C6  | C7  | ga_33 | ; corrin ring-specific but HEMC-derived angles             |
| N22 | C9  | C8  | ga_33 | ; corrin ring-specific but HEMC-derived angles             |
| C9  | N22 | C6  | ga_6  | ; corrin ring-specific but HEMC-derived angles             |
| C10 | C9  | N22 | ga_33 | ; corrin ring-specific but HEMC-derived angles             |
| N23 | C11 | C10 | ga_33 | ; corrin ring-specific but HEMC-derived angles             |
| N23 | C11 | C12 | ga_33 | ; corrin ring-specific but HEMC-derived angles             |
| N23 | C14 | C13 | ga_33 | ; corrin ring-specific but HEMC-derived angles             |
| C14 | N23 | C11 | ga_6  | ; corrin ring-specific but HEMC-derived angles             |
| C15 | C14 | N23 | ga_33 | ; corrin ring-specific but HEMC-derived angles             |
| N24 | C16 | C15 | ga_33 | ; corrin ring-specific but HEMC-derived angles             |
| N24 | C19 | C1  | ga_13 | ; corrin ring-specific but HEMC-derived angles             |
| C19 | N24 | C16 | ga_6  | ; corrin ring-specific but HEMC-derived angles             |
| C17 | C16 | N24 | ga_33 | ; corrin ring-specific but HEMC-derived angles             |
| C18 | C19 | N24 | ga_13 | ; corrin ring-specific but HEMC-derived angles             |
| C3R | O2  | P   | ga_26 | ; phosphate angle from ADE                                 |
| O2  | P   | O3  | ga_5  | ; phosphate angle from ADE                                 |
| O2  | P   | O4  | ga_14 | ; phosphate angle from ADE                                 |
| O2  | P   | O5  | ga_14 | ; phosphate angle from ADE                                 |
| O3  | P   | O4  | ga_14 | ; phosphate angle from ADE                                 |

Supplementary Material (ESI) for Molecular BioSystems  
This journal is (c) The Royal Society of Chemistry, 2010

|     |     |     |       |                                                        |
|-----|-----|-----|-------|--------------------------------------------------------|
| O3  | P   | O5  | ga_14 | ; phosphate angle from ADE                             |
| O4  | P   | O5  | ga_29 | ; phosphate angle from ADE                             |
| P   | O3  | C2P | ga_26 | ; phosphate angle from ADE                             |
| O2  | C3R | C2R | ga_9  | ; phosphate oxygen to CHn carbons from ADE             |
| O2  | C3R | C4R | ga_9  | ; phosphate oxygen to CHn carbons from ADE             |
| O3  | C2P | C1P | ga_9  | ; phosphate oxygen to CHn carbons from ADE             |
| O3  | C2P | C3P | ga_9  | ; phosphate oxygen to CHn carbons from ADE             |
| C1  | C2  | C26 | ga_13 | ; CHn-CHn-CHn angles                                   |
| C1  | C2  | C25 | ga_13 | ; CHn-CHn-CHn angles                                   |
| C1  | C2  | C3  | ga_13 | ; CHn-CHn-CHn angles                                   |
| C1  | C19 | C18 | ga_13 | ; CHn-CHn-CHn angles                                   |
| C2  | C1  | C19 | ga_13 | ; CHn-CHn-CHn angles                                   |
| C2  | C1  | C20 | ga_13 | ; CHn-CHn-CHn angles                                   |
| C2  | C3  | C30 | ga_13 | ; CHn-CHn-CHn angles                                   |
| C3  | C2  | C25 | ga_13 | ; CHn-CHn-CHn angles                                   |
| C3  | C2  | C26 | ga_13 | ; CHn-CHn-CHn angles                                   |
| C3  | C30 | C31 | ga_13 | ; CHn-CHn-CHn angles                                   |
| C7  | C8  | C41 | ga_13 | ; CHn-CHn-CHn angles                                   |
| C8  | C41 | C42 | ga_13 | ; CHn-CHn-CHn angles                                   |
| C12 | C13 | C48 | ga_13 | ; CHn-CHn-CHn angles                                   |
| C13 | C12 | C46 | ga_13 | ; CHn-CHn-CHn angles                                   |
| C13 | C12 | C47 | ga_13 | ; CHn-CHn-CHn angles                                   |
| C13 | C48 | C49 | ga_13 | ; CHn-CHn-CHn angles                                   |
| C17 | C18 | C19 | ga_13 | ; CHn-CHn-CHn angles                                   |
| C17 | C18 | C60 | ga_13 | ; CHn-CHn-CHn angles                                   |
| C17 | C55 | C56 | ga_13 | ; CHn-CHn-CHn angles                                   |
| C18 | C17 | C54 | ga_13 | ; CHn-CHn-CHn angles                                   |
| C18 | C17 | C55 | ga_13 | ; CHn-CHn-CHn angles                                   |
| C19 | C1  | C20 | ga_13 | ; CHn-CHn-CHn angles                                   |
| C19 | C18 | C60 | ga_13 | ; CHn-CHn-CHn angles                                   |
| C25 | C2  | C26 | ga_13 | ; CHn-CHn-CHn angles                                   |
| C46 | C12 | C47 | ga_13 | ; CHn-CHn-CHn angles                                   |
| C54 | C17 | C55 | ga_13 | ; CHn-CHn-CHn angles                                   |
| C36 | C7  | C37 | ga_13 | ; CHn-CHn-CHn angles                                   |
| C2  | C3  | C4  | ga_15 | ; sp3-sp3-sp2 corrin ring carbon angle                 |
| C4  | C3  | C30 | ga_15 | ; sp3-sp3-sp2 corrin ring carbon angle                 |
| C6  | C7  | C8  | ga_15 | ; sp3-sp3-sp2 corrin ring carbon angle                 |
| C6  | C7  | C36 | ga_15 | ; sp3-sp3-sp2 corrin ring carbon angle                 |
| C6  | C7  | C37 | ga_15 | ; sp3-sp3-sp2 corrin ring carbon angle                 |
| C7  | C8  | C9  | ga_15 | ; sp3-sp3-sp2 corrin ring carbon angle                 |
| C8  | C7  | C36 | ga_15 | ; sp3-sp3-sp2 corrin ring carbon angle                 |
| C8  | C7  | C37 | ga_15 | ; sp3-sp3-sp2 corrin ring carbon angle                 |
| C9  | C8  | C41 | ga_15 | ; sp3-sp3-sp2 corrin ring carbon angle                 |
| C11 | C12 | C13 | ga_15 | ; sp3-sp3-sp2 corrin ring carbon angle                 |
| C11 | C12 | C46 | ga_15 | ; sp3-sp3-sp2 corrin ring carbon angle                 |
| C11 | C12 | C47 | ga_15 | ; sp3-sp3-sp2 corrin ring carbon angle                 |
| C12 | C13 | C14 | ga_15 | ; sp3-sp3-sp2 corrin ring carbon angle                 |
| C14 | C13 | C48 | ga_15 | ; sp3-sp3-sp2 corrin ring carbon angle                 |
| C16 | C17 | C18 | ga_15 | ; sp3-sp3-sp2 corrin ring carbon angle                 |
| C16 | C17 | C54 | ga_15 | ; sp3-sp3-sp2 corrin ring carbon angle                 |
| C16 | C17 | C55 | ga_15 | ; sp3-sp3-sp2 corrin ring carbon angle                 |
| C4  | C5  | C6  | ga_27 | ; sp2-sp2-sp2 corrin ring carbon angle                 |
| C9  | C10 | C11 | ga_27 | ; sp2-sp2-sp2 corrin ring carbon angle                 |
| C14 | C15 | C16 | ga_27 | ; sp2-sp2-sp2 corrin ring carbon angle                 |
| C3  | C4  | C5  | ga_37 | ; sp3-sp2-sp2 corrin ring carbon angle                 |
| C4  | C5  | C35 | ga_37 | ; sp3-sp2-sp2 corrin ring carbon angle                 |
| C5  | C6  | C7  | ga_37 | ; sp3-sp2-sp2 corrin ring carbon angle                 |
| C6  | C5  | C35 | ga_37 | ; sp3-sp2-sp2 corrin ring carbon angle                 |
| C8  | C9  | C10 | ga_37 | ; sp3-sp2-sp2 corrin ring carbon angle                 |
| C10 | C11 | C12 | ga_37 | ; sp3-sp2-sp2 corrin ring carbon angle                 |
| C13 | C14 | C15 | ga_37 | ; sp3-sp2-sp2 corrin ring carbon angle                 |
| C14 | C15 | C53 | ga_37 | ; sp3-sp2-sp2 corrin ring carbon angle                 |
| C15 | C16 | C17 | ga_37 | ; sp3-sp2-sp2 corrin ring carbon angle                 |
| C16 | C15 | C53 | ga_37 | ; sp3-sp2-sp2 corrin ring carbon angle                 |
| C5M | C5B | C4B | ga_37 | ; sp2-sp2-methyl dimethylbenzimidazole angle           |
| C5M | C5B | C6B | ga_37 | ; sp2-sp2-methyl dimethylbenzimidazole angle           |
| C6M | C6B | C5B | ga_37 | ; sp2-sp2-methyl dimethylbenzimidazole angle           |
| C6M | C6B | C7B | ga_37 | ; sp2-sp2-methyl dimethylbenzimidazole angle           |
| C4B | C5B | C6B | ga_27 | ; Csp2-Csp2-Csp2 dimethylbenzimidazole angle           |
| C5B | C4B | C9B | ga_27 | ; Csp2-Csp2-Csp2 dimethylbenzimidazole angle           |
| C5B | C6B | C7B | ga_27 | ; Csp2-Csp2-Csp2 dimethylbenzimidazole angle           |
| N1B | C1R | C2R | ga_9  | ; from ADE Nsp2-containing dimethylbenzimidazole angle |
| N1B | C1R | O6R | ga_9  | ; from ADE Nsp2-containing dimethylbenzimidazole angle |
| N1B | C2B | N3B | ga_7  | ; from ADE Nsp2-containing dimethylbenzimidazole angle |
| C2B | N1B | C1R | ga_37 | ; from ADE Nsp2-containing dimethylbenzimidazole angle |
| N3B | C9B | C4B | ga_39 | ; from ADE Nsp2-containing dimethylbenzimidazole angle |
| C9B | N3B | C2B | ga_7  | ; from ADE Nsp2-containing dimethylbenzimidazole angle |
| C1R | C2R | C3R | ga_8  | ; from ADE sugar angle                                 |
| C1R | C2R | O7R | ga_9  | ; from ADE sugar angle                                 |
| C1R | O6R | C4R | ga_10 | ; from ADE sugar angle                                 |
| C2R | C1R | O6R | ga_9  | ; from ADE sugar angle                                 |

Supplementary Material (ESI) for Molecular BioSystems  
This journal is (c) The Royal Society of Chemistry, 2010

```

C2R C3R C4R ga_8 ; from ADE sugar angle
C2R O7R HAA ga_12 ; from ADE sugar angle
C3R C2R O7R ga_9 ; from ADE sugar angle
C3R C4R C5R ga_8 ; from ADE sugar angle
C3R C4R O6R ga_9 ; from ADE sugar angle
C4R C5R O8R ga_9 ; from ADE sugar angle
C5R O8R HAB ga_12 ; from ADE sugar angle
C5R C4R O6R ga_9 ; from ADE sugar angle
C1P C2P C3P ga_13 ; amide linkage angle
C57 C56 C55 ga_13 ; amide linkage angle
C57 N59 HAC ga_23 ; from GLN angle
N59 C57 O58 ga_33 ; from GLN angle
C56 C57 N59 ga_19 ; from GLN angle
O58 C57 C56 ga_30 ; from GLN angle
C1P N59 C57 ga_31 ; from force field angle definitions
C1P N59 HAC ga_18 ; from force field angle definitions
C2P C1P N59 ga_15 ; from force field angle definitions
C5B C4B H4B ga_25 ; from PHE C-C-H angle
C9B C4B H4B ga_25 ; from PHE C-C-H angle
C6B C7B H7B ga_25 ; from PHE C-C-H angle
C8B C7B H7B ga_25 ; from PHE C-C-H angle
N1B C2B H2B ga_36 ; from ADE N-C-H angle
N3B C2B H2B ga_36 ; from ADE N-C-H angle
C9 C10 H10 ga_25 ; corrin ring C-C10-H angle
C11 C10 H10 ga_20 ; corrin ring C-C10-H angle
;
; cyano group addition to the original B12 topology
;
N21 FE C1N ga_1 ; cyano group from HEMC CO group
N22 FE C1N ga_1 ; cyano group from HEMC CO group
N23 FE C1N ga_1 ; cyano group from HEMC CO group
N24 FE C1N ga_1 ; cyano group from HEMC CO group
FE C1N N1C ga_41 ; cyano group from HEMC CO group
N3B FE C1N ga_41 ; cyano group from HEMC CO group (found during pdb2gmx)
[ impropers ]
;
ai aj ak al gromos type
C1R C8B C2B N1B gi_1 ; dimethylbenzimidazole improper for planarity
N1B C8B C9B N3B gi_1 ; dimethylbenzimidazole improper for planarity
C8B N1B C7B C9B gi_1 ; dimethylbenzimidazole improper for planarity
C8B N1B C2B N3B gi_1 ; dimethylbenzimidazole improper for planarity
C8B C7B C6B C5B gi_1 ; dimethylbenzimidazole improper for planarity
C8B C9B N3B C2B gi_1 ; dimethylbenzimidazole improper for planarity
C7B C8B C9B C4B gi_1 ; dimethylbenzimidazole improper for planarity
C7B C6B C5B C4B gi_1 ; dimethylbenzimidazole improper for planarity
C6B C5B C4B C9B gi_1 ; dimethylbenzimidazole improper for planarity
C5B C4B C9B C8B gi_1 ; dimethylbenzimidazole improper for planarity
C9B C8B C7B C6B gi_1 ; dimethylbenzimidazole improper for planarity
C9B C4B N3B C8B gi_1 ; dimethylbenzimidazole improper for planarity
C9B N3B C2B N1B gi_1 ; dimethylbenzimidazole improper for planarity
C2B N1B C8B C9B gi_1 ; dimethylbenzimidazole improper for planarity
C5M C4B C6B C5B gi_1 ; dimethylbenzimidazole methyl groups
C6M C7B C5B C6B gi_1 ; dimethylbenzimidazole methyl groups
C2B N1B N3B H2B gi_1 ; dimethylbenzimidazole H atom-containing planarity
C4B C9B C5B H4B gi_1 ; dimethylbenzimidazole H atom-containing planarity
C7B C8B C6B H7B gi_1 ; dimethylbenzimidazole H atom-containing planarity
N3B FE C2B C9B gi_1 ; Fe-dimethylbenzimidazole planarity
N21 C4 C5 C6 gi_1 ; HEMC-based conjugated corrin ring improper planarity
N22 C6 C5 C4 gi_1 ; HEMC-based conjugated corrin ring improper planarity
N22 C9 C10 C11 gi_1 ; HEMC-based conjugated corrin ring improper planarity
N23 C11 C10 C9 gi_1 ; HEMC-based conjugated corrin ring improper planarity
N23 C14 C15 C16 gi_1 ; HEMC-based conjugated corrin ring improper planarity
N24 C16 C15 C14 gi_1 ; HEMC-based conjugated corrin ring improper planarity
C5 C4 C6 C35 gi_1 ; corrin ring on-Csp2 methyl group improper planarity
C15 C16 C14 C53 gi_1 ; corrin ring on-Csp2 methyl group improper planarity
C27 O28 N29 C26 gi_1 ; from GLN improper torsion definition
N29 HAE HAD C27 gi_1 ; from GLN improper torsion definition
C32 O34 N33 C31 gi_1 ; from GLN improper torsion definition
N33 HAG HAF C32 gi_1 ; from GLN improper torsion definition
C38 O39 N40 C37 gi_1 ; from GLN improper torsion definition
N40 HAI HAH C38 gi_1 ; from GLN improper torsion definition
C43 O44 N45 C42 gi_1 ; from GLN improper torsion definition
N45 HAK HAJ C43 gi_1 ; from GLN improper torsion definition
C50 O51 N52 C49 gi_1 ; from GLN improper torsion definition
N52 HAM HAL C50 gi_1 ; from GLN improper torsion definition
C61 O63 N62 C60 gi_1 ; from GLN improper torsion definition
N62 HAO HAN C61 gi_1 ; from GLN improper torsion definition
C57 C56 O58 N59 gi_1 ; amide linkage C57 planarity
N59 C57 C1P HAC gi_1 ; amide linkage N59 planarity
C4 N21 C3 C5 gi_1 ; corrin ring C sp2 planarity
C5 C4 C6 C35 gi_1 ; corrin ring C sp2 planarity
C6 N22 C5 C7 gi_1 ; corrin ring C sp2 planarity

```

Supplementary Material (ESI) for Molecular BioSystems  
This journal is (c) The Royal Society of Chemistry, 2010

```

C9      N22      C10      C8      gi_1      ;      corrin ring C sp2 planarity
C11     N23      C10      C12     gi_1      ;      corrin ring C sp2 planarity
C14     N23      C15      C13     gi_1      ;      corrin ring C sp2 planarity
C15     C14      C16      C53     gi_1      ;      corrin ring C sp2 planarity
C16     N24      C15      C17     gi_1      ;      corrin ring C sp2 planarity
C10     C9       C11      H10     gi_1      ;      corrin ring C10 planarity
C18     C17      C19      C60     gi_2      ;      corrin ring C atom sp3 tetrahedral geometry
C19     N24      C18      C1      gi_2      ;      corrin ring C atom sp3 tetrahedral geometry
C3      C2       C30      C4      gi_2      ;      corrin ring C atom sp3 tetrahedral geometry
C8      C9       C7       C41     gi_2      ;      corrin ring C atom sp3 tetrahedral geometry
C13     C14      C12      C48     gi_2      ;      corrin ring C atom sp3 tetrahedral geometry
C2P     C1P      O3       C3P     gi_2      ;      corrin ring C atom sp3 tetrahedral geometry
C1R     N1B      C2R      O6R     gi_2      ;      sugar C atom tetrahedral geometry
C2R     O7R      C3R      C1R     gi_2      ;      sugar C atom tetrahedral geometry
C3R     C5R      O6R      C4R     gi_2      ;      sugar C atom tetrahedral geometry
C3R     C2R      O2       C4R     gi_2      ;      sugar C atom tetrahedral geometry
FE      C1       C4       N21     gi_3      ;      HEMC improper definition
FE      C6       C9       N22     gi_3      ;      HEMC improper definition
FE      C11      C14      N23     gi_3      ;      HEMC improper definition
FE      C16      C19      N24     gi_3      ;      HEMC improper definition
[ dihedrals ]
;      ai      aj      ak      al      gromos type
C3R     O2      P       O3      gd_20     ;      from ADE phosphate definition
C3R     O2      P       O3      gd_27     ;      from ADE phosphate definition
C2P     O3      P       O2      gd_20     ;      from ADE phosphate definition
C2P     O3      P       O2      gd_27     ;      from ADE phosphate definition
P       O3      C2P     C1P     gd_7       ;      from ADE phosphate definition
C2R     C3R     O2      P       gd_29     ;      from ADE phosphate definition
O8R     C5R     C4R     O6R     gd_8       ;      from ADE sugar dihedrals
O8R     C5R     C4R     O6R     gd_25     ;      from ADE sugar dihedrals
O8R     C5R     C4R     C3R     gd_17     ;      from ADE sugar dihedrals
O8R     C5R     C4R     C3R     gd_34     ;      from ADE sugar dihedrals
C3R     C4R     O6R     C1R     gd_29     ;      from ADE sugar dihedrals
C5R     C4R     C3R     C2R     gd_34     ;      from ADE sugar dihedrals
C5R     C4R     C3R     O2      gd_17     ;      from ADE sugar dihedrals
O6R     C4R     C3R     C2R     gd_17     ;      from ADE sugar dihedrals
O6R     C4R     C3R     O2      gd_18     ;      from ADE sugar dihedrals
C4R     O6R     C1R     C2R     gd_29     ;      from ADE sugar dihedrals
O6R     C1R     C2R     O7R     gd_18     ;      from ADE sugar dihedrals
O6R     C1R     C2R     C3R     gd_17     ;      from ADE sugar dihedrals
O6R     C1R     C2R     C3R     gd_34     ;      from ADE sugar dihedrals
C1R     C2R     C3R     C4R     gd_34     ;      from ADE sugar dihedrals
C1R     C2R     C3R     O2      gd_17     ;      from ADE sugar dihedrals
O7R     C2R     C3R     C4R     gd_17     ;      from ADE sugar dihedrals
O7R     C2R     C3R     O2      gd_18     ;      from ADE sugar dihedrals
C1R     C2R     O7R     HAA     gd_23     ;      from ADE sugar dihedrals
N1B     C1R     C2R     O7R     gd_17     ;      from ADE sugar dihedrals
O6R     C1R     N1B     C8B     gd_16     ;      from ADE sugar dihedrals
C4R     C5R     O8R     HAB     gd_2       ;      additional ADE-based sugar dihedral
N1B     C1R     C2R     C3R     gd_17     ;      additional ADE-based sugar dihedral
N1B     C1R     O6R     C4R     gd_17     ;      additional ADE-based sugar dihedral
C2      C26     C27     N29     gd_40     ;      from GLN dihedral
C26     C27     N29     HAD     gd_14     ;      from GLN dihedral
C30     C31     C32     N33     gd_40     ;      from GLN dihedral
C31     C32     N33     HAF     gd_14     ;      from GLN dihedral
C7      C37     C38     N40     gd_40     ;      from GLN dihedral
C37     C38     N40     HAH     gd_14     ;      from GLN dihedral
C41     C42     C43     N45     gd_40     ;      from GLN dihedral
C42     C43     N45     HAJ     gd_14     ;      from GLN dihedral
C48     C49     C50     N52     gd_40     ;      from GLN dihedral
C49     C50     N52     HAL     gd_14     ;      from GLN dihedral
C18     C60     C61     N62     gd_40     ;      from GLN dihedral
C60     C61     N62     HAN     gd_14     ;      from GLN dihedral
C5M     C5B     C6B     C6M     gd_33     ;      dimethylbenzimidazole methyl dihedral fix
C4B     C5B     C6B     C6M     gd_10     ;      dimethylbenzimidazole methyl dihedral fix
C8B     C7B     C6B     C6M     gd_10     ;      dimethylbenzimidazole methyl dihedral fix
C7B     C6B     C5B     C5M     gd_10     ;      dimethylbenzimidazole methyl dihedral fix
C9B     C4B     C5B     C5M     gd_10     ;      dimethylbenzimidazole methyl dihedral fix
C35     C5      C4      N21     gd_10     ;      corrin ring methyl planarity
C35     C5      C6      N22     gd_10     ;      corrin ring methyl planarity
C53     C15     C14     N23     gd_10     ;      corrin ring methyl planarity
C53     C1      C16     N24     gd_10     ;      corrin ring methyl planarity
N24     C19     C1      N21     gd_34     ;      corrin ring but HEMC-derived N,C torsions
N24     C19     C1      N21     gd_34     ;      corrin ring but HEMC-derived N,C torsions
N21     C4      C5      C6      gd_15     ;      corrin ring but HEMC-derived N,C torsions
C4      C5      C6      N22     gd_15     ;      corrin ring but HEMC-derived N,C torsions
N22     C9      C10     C11     gd_15     ;      corrin ring but HEMC-derived N,C torsions
C9      C10     C11     N23     gd_15     ;      corrin ring but HEMC-derived N,C torsions
N23     C14     C15     C16     gd_15     ;      corrin ring but HEMC-derived N,C torsions
C14     C15     C16     N24     gd_15     ;      corrin ring but HEMC-derived N,C torsions
C1      C2      C26     C27     gd_40     ;      corrin ring HEMC derived CHn torsions

```

Supplementary Material (ESI) for Molecular BioSystems  
This journal is (c) The Royal Society of Chemistry, 2010

```

C25 C2 C26 C27 gd_34 ; corrin ring HEMC derived CHn torsions
C2 C26 C27 O28 gd_34 ; corrin ring HEMC derived CHn torsions
C2 C3 C30 C31 gd_9 ; corrin ring HEMC derived CHn torsions
C3 C30 C31 C32 gd_40 ; corrin ring HEMC derived CHn torsions
C30 C31 C32 O34 gd_40 ; corrin ring HEMC derived CHn torsions
C6 C7 C37 C38 gd_40 ; corrin ring HEMC derived CHn torsions
C36 C7 C37 C38 gd_40 ; corrin ring HEMC derived CHn torsions
C7 C37 C38 C39 gd_40 ; corrin ring HEMC derived CHn torsions
C7 C8 C41 C42 gd_9 ; corrin ring HEMC derived CHn torsions
C8 C41 C42 C43 gd_34 ; corrin ring HEMC derived CHn torsions
C41 C42 C43 O44 gd_40 ; corrin ring HEMC derived CHn torsions
C12 C13 C48 C49 gd_9 ; corrin ring HEMC derived CHn torsions
C13 C48 C49 C50 gd_34 ; corrin ring HEMC derived CHn torsions
C48 C49 C50 O51 gd_40 ; corrin ring HEMC derived CHn torsions
C16 C17 C55 C56 gd_40 ; corrin ring HEMC derived CHn torsions
C54 C17 C56 C57 gd_40 ; corrin ring HEMC derived CHn torsions
C17 C55 C56 C57 gd_34 ; corrin ring HEMC derived CHn torsions
C55 C56 C57 O58 gd_40 ; corrin ring HEMC derived CHn torsions
C17 C18 C60 C61 gd_9 ; corrin ring HEMC derived CHn torsions
C18 C60 C61 O63 gd_34 ; corrin ring HEMC derived CHn torsions
C18 C17 C55 C56 gd_9 ; corrin ring HEMC derived CHn torsions
N59 C1P C2P O3 gd_34 ; amide linkage torsion terms
N59 C1P C2P C3P gd_34 ; amide linkage torsion terms
C2P C1P N59 C57 gd_34 ; amide linkage torsion terms
C56 C57 N59 C1P gd_14 ; amide linkage torsion terms
C55 C56 C57 N59 gd_40 ; amide linkage torsion terms
C17 C55 C56 C57 gd_40 ; amide linkage torsion terms
C5 C4 N21 C1 gd_14 ; corrin ring sp3-containing torsions
C10 C9 N22 C6 gd_14 ; corrin ring sp3-containing torsions
C5 C6 N22 C9 gd_14 ; corrin ring sp3-containing torsions
C15 C14 N23 C11 gd_14 ; corrin ring sp3-containing torsions
C10 C11 N23 C14 gd_14 ; corrin ring sp3-containing torsions
C15 C16 N24 C19 gd_14 ; corrin ring sp3-containing torsions
C4 N21 C1 C2 gd_40 ; corrin ring sp3-containing torsions
C18 C19 N24 C16 gd_40 ; corrin ring sp3-containing torsions
N22 C6 C5 C4 gd_33 ; corrin ring sp3-containing torsions
N23 C11 C10 C9 gd_33 ; corrin ring sp3-containing torsions
C19 C18 C17 C55 gd_34 ; corrin ring sp3-containing torsions
C55 C17 C16 C15 gd_40 ; corrin ring sp3-containing torsions
C17 C18 C19 C1 gd_34 ; corrin ring sp3-containing torsions
C18 C19 C1 C2 gd_34 ; corrin ring sp3-containing torsions
C17 C16 C15 C14 gd_10 ; corrin ring sp3-containing torsions
C16 C15 C14 C13 gd_10 ; corrin ring sp3-containing torsions
C15 C14 C13 C12 gd_40 ; corrin ring sp3-containing torsions
C6 C7 C8 C9 gd_34 ; corrin ring sp3-containing torsions
C8 C7 C6 C5 gd_34 ; corrin ring sp3-containing torsions
C30 C3 C2 C1 gd_34 ; corrin ring sp3-containing torsions
C11 C12 C13 C14 gd_34 ; corrin ring sp3-containing torsions
C13 C12 C11 C10 gd_34 ; corrin ring sp3-containing torsions
C10 C9 C8 C7 gd_10 ; corrin ring sp3-containing torsions
C5 C4 C3 C30 gd_34 ; corrin ring sp3-containing torsions
C3 C2 C1 C19 gd_34 ; corrin ring sp3-containing torsions
;
; cyano group dihedral. imidazole-Fe-CN group torsion
;
C9B N3B FE N21 gd_38 ; THIS IS NEW!!!
N3B FE N21 C1 gd_38 ; THIS IS NEW!!!
N3B FE N22 C6 gd_38 ; THIS IS NEW!!!
N3B FE N23 C11 gd_38 ; THIS IS NEW!!!
N3B FE N24 C16 gd_38 ; THIS IS NEW!!!
N3B FE C1N N1C gd_38 ; corrin ring sp3-containing torsions

```

Supplementary Material (ESI) for Molecular BioSystems  
This journal is (c) The Royal Society of Chemistry, 2010

```
[ LCB ]
;
; lysine-cyanocobalamin residue file based on the HEMC CO parameters
;
[ atoms ]
C27 C 0.38000 0 ; from GLN residue
O28 O -0.38000 0 ; from GLN residue
N29 NT -0.83000 0 ; from GLN residue
HAE H 0.41500 0 ; from GLN residue
HAD H 0.41500 0 ; from GLN residue
C32 C 0.38000 1 ; from GLN residue
O34 O -0.38000 1 ; from GLN residue
N33 NT -0.83000 1 ; from GLN residue
HAG H 0.41500 1 ; from GLN residue
HAF H 0.41500 1 ; from GLN residue
C38 C 0.38000 2 ; from GLN residue
O39 O -0.38000 2 ; from GLN residue
N40 NT -0.83000 2 ; from GLN residue
HAI H 0.41500 2 ; from GLN residue
HAH H 0.41500 2 ; from GLN residue
C43 C 0.38000 3 ; from GLN residue
O44 O -0.38000 3 ; from GLN residue
N45 NT -0.83000 3 ; from GLN residue
HAK H 0.41500 3 ; from GLN residue
HAJ H 0.41500 3 ; from GLN residue
C50 C 0.38000 4 ; from GLN residue
O51 O -0.38000 4 ; from GLN residue
N52 NT -0.83000 4 ; from GLN residue
HAM H 0.41500 4 ; from GLN residue
HAL H 0.41500 4 ; from GLN residue
C61 C 0.38000 5 ; from GLN residue
O63 O -0.38000 5 ; from GLN residue
N62 NT -0.83000 5 ; from GLN residue
HAO H 0.41500 5 ; from GLN residue
HAN H 0.41500 5 ; from GLN residue
C20 CH3 0.00000 6 ; methyl group
C25 CH3 0.00000 7 ; methyl group
C36 CH3 0.00000 8 ; methyl group
C46 CH3 0.00000 9 ; methyl group
C47 CH3 0.00000 10 ; methyl group
C54 CH3 0.00000 11 ; methyl group
C26 CH2 0.00000 12 ; non-polar CHn fragments
C30 CH2 0.00000 13 ; non-polar CHn fragments
C31 CH2 0.00000 13 ; non-polar CHn fragments
C37 CH2 0.00000 14 ; non-polar CHn fragments
C41 CH2 0.00000 15 ; non-polar CHn fragments
C42 CH2 0.00000 15 ; non-polar CHn fragments
C48 CH2 0.00000 16 ; non-polar CHn fragments
C49 CH2 0.00000 16 ; non-polar CHn fragments
C56 CH2 0.00000 17 ; non-polar CHn fragments
C55 CH2 0.00000 17 ; non-polar CHn fragments
C60 CH2 0.00000 18 ; non-polar CHn fragments
C2R CH1 0.15000 19 ; C2*-O2*-H2* from ADE
O7R OA -0.54800 19 ; C2*-O2*-H2* from ADE
HAA H 0.39800 19 ; C2*-O2*-H2* from ADE
C1R CH1 0.20000 20 ; C1*-O4*-C4* from ADE
O6R OA -0.36000 20 ; C1*-O4*-C4* from ADE
C4R CH1 0.16000 20 ; C1*-O4*-C4* from ADE
C3R CH1 0.00000 21 ; C3* from ADE
C5R CH2 0.15000 22 ; C2*-O2*-H2* from ADE
O8R OA -0.54800 22 ; C2*-O2*-H2* from ADE
; O8R OA -0.54800 22 ; C2*-O2*-H2* from ADE
;
; HAB from B12 is gone in LYB, where the lysine fragment is added via CLB
; HAB H 0.39800 22 ; C2*-O2*-H2* from ADE
; HAB from B12 is gone in LYB, where the lysine fragment is added via CLB
;
P P 2.20000 23 ; PO3+O3* fragment from ADE
;
; the O2P is a special mod to the PDB file. The O2 (fine in B12) is a "special" label
; that pdb2gmx has some kind of structure prep issue with. This, like the CO to FE, is a
; by-hand hack of the PDB file (for now)
;
O2P OA -0.80000 23 ; PO3+O3* fragment from ADE
O4 OM -1.00000 23 ; PO3+O3* fragment from ADE
O5 OM -1.00000 23 ; PO3+O3* fragment from ADE
O3 OA -0.80000 23 ; PO3+O3* fragment from ADE
C2P CH1 0.35000 24 ; non-polar CHn fragment
C3P CH3 0.00000 24 ; non-polar CHn fragment
C1P CH2 0.00000 24 ; non-polar CHn fragment
N59 N -0.28000 25 ; tempered GLN fragment charges
```



Supplementary Material (ESI) for Molecular BioSystems  
This journal is (c) The Royal Society of Chemistry, 2010

```

HAC      H      0.28000    25 ; tempered GLN fragment charges
C57      C      0.38000    25 ; tempered GLN fragment charges
O58      O     -0.38000    25 ; tempered GLN fragment charges
C5B      C      0.00000    26 ; dimethylbenzimidazole C-CH3 group (non-polar)
C5M      CH3     0.00000    26 ; dimethylbenzimidazole C-CH3 group (non-polar)
C6B      C      0.00000    27 ; dimethylbenzimidazole C-CH3 group (non-polar)
C6M      CH3     0.00000    27 ; dimethylbenzimidazole C-CH3 group (non-polar)
C4B      C     -0.14000    28 ; dimethylbenzimidazole aromatic C-H from TRP, PHE
H4B      H      0.14000    28 ; dimethylbenzimidazole aromatic C-H from TRP, PHE
C7B      C     -0.14000    29 ; dimethylbenzimidazole aromatic C-H from TRP, PHE
H7B      H      0.14000    29 ; dimethylbenzimidazole aromatic C-H from TRP, PHE
N3B      NR     -0.55000    30 ; dimethylbenzimidazole polar aromatic NC fragment
C9B      C      0.20000    30 ; dimethylbenzimidazole polar aromatic NC fragment
N1B      NR     -0.30000    31 ; dimethylbenzimidazole polar aromatic NC fragment
C8B      C      0.20000    31 ; dimethylbenzimidazole polar aromatic NC fragment
C2B      C      0.23000    32 ; dimethylbenzimidazole aromatic C-H from TRP, PHE
H2B      H      0.23000    32 ; dimethylbenzimidazole aromatic C-H from TRP, PHE
C5       C     -0.05000    33 ; C-CH3 group (non-polar)
C35      CH3     0.00000    33 ; C-CH3 group (non-polar)
C15      C     -0.05000    34 ; C-CH3 group (non-polar)
C53      CH3     0.00000    34 ; C-CH3 group (non-polar)
FE       FE      1.00000    35 ; HEMC Fe-N group
N21      NR     -0.44000    35 ; HEMC Fe-N group
N22      NR     -0.50000    35 ; HEMC Fe-N group
N23      NR     -0.50000    35 ; HEMC Fe-N group
N24      NR     -0.44000    35 ; HEMC Fe-N group
C1       CH0     0.22000    36 ; non-polar HEMC-derived corrin atoms
C2       CH0     0.00000    36 ; non-polar HEMC-derived corrin atoms
C3       CH1     0.00000    36 ; non-polar HEMC-derived corrin atoms
C4       C       0.38000    36 ; non-polar HEMC-derived corrin atoms
C6       C       0.29000    37 ; non-polar HEMC-derived corrin atoms
C7       CH0     0.00000    37 ; non-polar HEMC-derived corrin atoms
C8       CH1     0.00000    37 ; non-polar HEMC-derived corrin atoms
C9       C       0.35000    37 ; non-polar HEMC-derived corrin atoms
C16      C       0.38000    38 ; non-polar HEMC-derived corrin atoms
C17      CH0     0.00000    38 ; non-polar HEMC-derived corrin atoms
C18      CH1     0.00000    38 ; non-polar HEMC-derived corrin atoms
C19      CH1     0.24000    38 ; non-polar HEMC-derived corrin atoms
C11      C       0.35000    39 ; non-polar HEMC-derived corrin atoms
C12      CH0     0.00000    39 ; non-polar HEMC-derived corrin atoms
C13      CH1     0.00000    39 ; non-polar HEMC-derived corrin atoms
C14      C       0.29000    39 ; non-polar HEMC-derived corrin atoms
C10      C     -0.24000    40 ; aromatic C-H from TRP, PHE
H10      H      0.14000    40 ; aromatic C-H from TRP, PHE
;
;   Since CO is not defined as an atom in GROMOSxx, CO is converted to FE and the HEME
;   values are employed. This is a workaround due for proper implementation.
;
N        N      -0.31000    41 ; standard LYS (lysine) atom information
H        H      0.31000    41 ; standard LYS (lysine) atom information
CA       CH1     0.00000    42 ; standard LYS (lysine) atom information
CB       CH2     0.00000    42 ; standard LYS (lysine) atom information
CG       CH2     0.00000    43 ; standard LYS (lysine) atom information
CD       CH2     0.00000    43 ; standard LYS (lysine) atom information
CE       CH2     0.00000    44 ; NEW CHARGE FROM B12 standard LYS (lysine) atom information
NZ       NT     -0.34000    44 ; NEW CHARGE FROM B12 standard LYS (lysine) atom information
HZ1      H      0.34000    44 ; NEW CHARGE FROM B12 standard LYS (lysine) atom information
; CE       CH2     -0.24000    44 ; standard LYS (lysine) atom information
; NZ       NT     -0.64000    44 ; standard LYS (lysine) atom information
; HZ1      H      0.44000    44 ; standard LYS (lysine) atom information
;
;   this H atom is gone, replaced by the linkage CLB atom.
;   HZ2      H      0.44000    44 ; standard LYS (lysine) atom information
;   this H atom is gone, replaced by the linkage CLB atom.
;
C        C       0.20000    45 ; NEW CHARGE FROM B12 standard LYS (lysine) atom information
O        O     -0.20000    45 ; NEW CHARGE FROM B12 standard LYS (lysine) atom information
; C        C       0.45000    45 ; standard LYS (lysine) atom information
; O        O     -0.45000    45 ; standard LYS (lysine) atom information
;
; linkage atoms (added new)
;
CLB      C       0.00000    46 ; this is the linkage carbon atom between LYS and B12
OLB      O       0.00000    46 ; this is the additional =O at the linkage position
;
; cyano group addition to the original B12 topology
;
C1N      C       0.04000    41 ; CN group on Fe
N1C      N     -0.42000    41 ; CN group on Fe
;
[ bonds ]

```

Supplementary Material (ESI) for Molecular BioSystems  
This journal is (c) The Royal Society of Chemistry, 2010

```
; ai aj gromos type
C26 C27 gb_27 ; from GLN fragment 0
C27 O28 gb_5 ; from GLN
C27 N29 gb_9 ; from GLN
N29 HAE gb_2 ; from GLN
N29 HAD gb_2 ; from GLN
C31 C32 gb_27 ; from GLN fragment 1
C32 O34 gb_5 ; from GLN
C32 N33 gb_9 ; from GLN
N33 HAG gb_2 ; from GLN
N33 HAF gb_2 ; from GLN
C37 C38 gb_27 ; from GLN fragment 2
C38 O39 gb_5 ; from GLN
C38 N40 gb_9 ; from GLN
N40 HAI gb_2 ; from GLN
N40 HAH gb_2 ; from GLN
C42 C43 gb_27 ; from GLN fragment 3
C43 O44 gb_5 ; from GLN
C43 N45 gb_9 ; from GLN
N45 HAK gb_2 ; from GLN
N45 HAJ gb_2 ; from GLN
C49 C50 gb_27 ; from GLN fragment 4
C50 O51 gb_5 ; from GLN
C50 N52 gb_9 ; from GLN
N52 HAM gb_2 ; from GLN
N52 HAL gb_2 ; from GLN
C60 C61 gb_27 ; from GLN fragment 5
C61 O63 gb_5 ; from GLN
C61 N62 gb_9 ; from GLN
N62 HAO gb_2 ; from GLN
N62 HAN gb_2 ; from GLN
FE N21 gb_35 ; FE-N bond from HEMC
FE N22 gb_35 ; FE-N bond from HEMC
FE N23 gb_35 ; FE-N bond from HEMC
FE N24 gb_35 ; FE-N bond from HEMC
FE N3B gb_37 ; FE-N3B bond from HEMC not in corrin ring
P O2P gb_28 ; from ADE phosphate
P O4 gb_24 ; from ADE phosphate
P O5 gb_24 ; from ADE phosphate
P O3 gb_28 ; from ADE phosphate
N21 C1 gb_21 ; corrin ring N-CHn bonds
N21 C4 gb_14 ; corrin ring N-C bonds
N22 C6 gb_14 ; corrin ring N-C bonds
N22 C9 gb_14 ; corrin ring N-C bonds
N23 C11 gb_14 ; corrin ring N-C bonds
N23 C14 gb_14 ; corrin ring N-C bonds
N24 C16 gb_14 ; corrin ring N-C bonds
N24 C19 gb_21 ; corrin ring N-CHn bonds
C30 C31 gb_27 ; CH2-CH2 bonds
C41 C42 gb_27 ; CH2-CH2 bonds
C48 C49 gb_27 ; CH2-CH2 bonds
C55 C56 gb_27 ; CH2-CH2 bonds
C56 C57 gb_27 ; CH2-CH2 bonds
N1B C1R gb_22 ; sugar bonds from ADE
C1R C2R gb_26 ; sugar bonds from ADE
C2R O7R gb_20 ; sugar bonds from ADE
O7R HAA gb_1 ; sugar bonds from ADE
C2R C3R gb_26 ; sugar bonds from ADE
C3R C4R gb_26 ; sugar bonds from ADE
C3R O2P gb_20 ; sugar bonds from ADE
C4R C5R gb_26 ; sugar bonds from ADE
C5R O8R gb_20 ; sugar bonds from ADE
;
; HAB is deleted from B12 for LYB O8R HAB gb_1 ; sugar bonds from ADE
;
C4R O6R gb_20 ; sugar bonds from ADE
O6R C1R gb_20 ; sugar bonds from ADE
C1P N59 gb_9 ; amide corrin - phosphate linkage
C1P C2P gb_27 ; amide corrin - phosphate linkage
C2P C3P gb_27 ; amide corrin - phosphate linkage
C2P O3 gb_20 ; amide corrin - phosphate linkage
N59 HAC gb_2 ; amide corrin - phosphate linkage
N59 C57 gb_9 ; amide corrin - phosphate linkage
C57 O5B gb_5 ; amide corrin - phosphate linkage
N1B C2B gb_10 ; dimethylbenzimidazole ring
C2B N3B gb_10 ; dimethylbenzimidazole ring
C2B H2B gb_3 ; dimethylbenzimidazole ring
N3B C9B gb_10 ; dimethylbenzimidazole ring
C9B C4B gb_16 ; dimethylbenzimidazole ring
C4B C5B gb_16 ; dimethylbenzimidazole ring
C4B H4B gb_3 ; dimethylbenzimidazole ring
```

Supplementary Material (ESI) for Molecular BioSystems  
This journal is (c) The Royal Society of Chemistry, 2010

```

C5B C6B gb_16 ; dimethylbenzimidazole ring
C5B C5M gb_27 ; dimethylbenzimidazole ring
C6B C7B gb_16 ; dimethylbenzimidazole ring
C6B C6M gb_27 ; dimethylbenzimidazole ring
C7B C8B gb_16 ; dimethylbenzimidazole ring
C7B H7B gb_3 ; dimethylbenzimidazole ring
C8B N1B gb_10 ; dimethylbenzimidazole ring
C8B C9B gb_16 ; dimethylbenzimidazole ring
C1 C20 gb_27 ; corrin ring carbon framework
C1 C2 gb_27 ; corrin ring carbon framework
C2 C3 gb_27 ; corrin ring carbon framework
C2 C25 gb_27 ; corrin ring carbon framework
C2 C26 gb_27 ; corrin ring carbon framework
C3 C4 gb_27 ; corrin ring carbon framework
C3 C30 gb_27 ; corrin ring carbon framework
C4 C5 gb_17 ; corrin ring carbon framework
C5 C6 gb_17 ; corrin ring carbon framework
C5 C35 gb_27 ; corrin ring carbon framework
C6 C7 gb_27 ; corrin ring carbon framework
C7 C8 gb_27 ; corrin ring carbon framework
C7 C37 gb_27 ; corrin ring carbon framework
C7 C36 gb_27 ; corrin ring carbon framework
C8 C9 gb_27 ; corrin ring carbon framework
C8 C41 gb_27 ; corrin ring carbon framework
C9 C10 gb_17 ; corrin ring carbon framework
C10 C11 gb_17 ; corrin ring carbon framework
C11 C12 gb_27 ; corrin ring carbon framework
C12 C46 gb_27 ; corrin ring carbon framework
C12 C47 gb_27 ; corrin ring carbon framework
C12 C13 gb_27 ; corrin ring carbon framework
C13 C14 gb_27 ; corrin ring carbon framework
C13 C48 gb_27 ; corrin ring carbon framework
C14 C15 gb_17 ; corrin ring carbon framework
C15 C16 gb_17 ; corrin ring carbon framework
C15 C53 gb_27 ; corrin ring carbon framework
C16 C17 gb_27 ; corrin ring carbon framework
C17 C18 gb_27 ; corrin ring carbon framework
C17 C54 gb_27 ; corrin ring carbon framework
C17 C55 gb_27 ; corrin ring carbon framework
C18 C19 gb_27 ; corrin ring carbon framework
C18 C60 gb_27 ; corrin ring carbon framework
C19 C1 gb_27 ; corrin ring carbon framework
C10 H10 gb_3 ; corrin ring C10-H10 bond
;
; linker bond from B12 to CLB
;
O8R CLB gb_5 ; LYS B12 linker (CLB replaces H)
;
; Lysine bond topology
;
N H gb_2 ; standard LYS (lysine)
N CA gb_21 ; standard LYS (lysine)
CA CB gb_27 ; standard LYS (lysine)
CA C gb_27 ; standard LYS (lysine)
CB CG gb_27 ; standard LYS (lysine)
CG CD gb_27 ; standard LYS (lysine)
CD CE gb_27 ; standard LYS (lysine)
CE NZ gb_21 ; standard LYS (lysine)
NZ HZ1 gb_2 ; standard LYS (lysine)
;
; this replaces the HZ2 with CLB for the B12-LYS connection
;
NZ CLB gb_9 ; standard LYS (lysine)
C O gb_5 ; standard LYS (lysine)
C +N gb_10 ; standard LYS (lysine)
;
; below is the C=O bond on the B12-LYS linkage (OLB is only connected to CLB)
;
CLB OLB gb_27 ; CLB-OLB linkage bond (previously nowhere in the structure)
;
; cyano group addition to the original B12 topology
;
FE C1N gb_30 ; cyano group on the Fe
C1N N1C gb_4 ; cyano group on the Fe
[ exclusions ]
; ai aj
FE C2
FE C3
FE C5
FE C7
FE C8

```

Supplementary Material (ESI) for Molecular BioSystems  
This journal is (c) The Royal Society of Chemistry, 2010

|     |     |                                     |
|-----|-----|-------------------------------------|
| FE  | C10 |                                     |
| FE  | C12 |                                     |
| FE  | C13 |                                     |
| FE  | C15 |                                     |
| FE  | C17 |                                     |
| FE  | C18 |                                     |
| FE  | C20 |                                     |
| N21 | C25 |                                     |
| N21 | C26 |                                     |
| N21 | C30 |                                     |
| N21 | C35 |                                     |
| N21 | C6  |                                     |
| N21 | C9  |                                     |
| N21 | C11 |                                     |
| N21 | C14 |                                     |
| N21 | C16 |                                     |
| N21 | C19 |                                     |
| N21 | C10 |                                     |
| N22 | C1  |                                     |
| N22 | C4  |                                     |
| N22 | C36 |                                     |
| N22 | C37 |                                     |
| N22 | C11 |                                     |
| N22 | C14 |                                     |
| N22 | C16 |                                     |
| N22 | C19 |                                     |
| N22 | C15 |                                     |
| N23 | C16 |                                     |
| N23 | C19 |                                     |
| N23 | C1  |                                     |
| N23 | C4  |                                     |
| N23 | C6  |                                     |
| N23 | C9  |                                     |
| N23 | C46 |                                     |
| N23 | C47 |                                     |
| N23 | C48 |                                     |
| N23 | C5  |                                     |
| N24 | C4  |                                     |
| N24 | C5  |                                     |
| N24 | C6  |                                     |
| N24 | C9  |                                     |
| N24 | C10 |                                     |
| N24 | C11 |                                     |
| N24 | C14 |                                     |
| N24 | C55 |                                     |
| N24 | C54 |                                     |
| N24 | C60 |                                     |
| C1R | C7B |                                     |
| C1R | C9B |                                     |
| C1R | N3B |                                     |
| N1B | C6B |                                     |
| N1B | C4B |                                     |
| C8B | C5B |                                     |
| C8B | C5M |                                     |
| C8B | C6M |                                     |
| C7B | C4B |                                     |
| C7B | N3B |                                     |
| C7B | C2B |                                     |
| C2B | C9B |                                     |
| C5B | C2B |                                     |
| C5M | C6M |                                     |
| C1  | C30 | ; HEMC-based C framework exclusions |
| C1  | C5  | ; HEMC-based C framework exclusions |
| C2  | C5  | ; HEMC-based C framework exclusions |
| C3  | C35 | ; HEMC-based C framework exclusions |
| C3  | C6  | ; HEMC-based C framework exclusions |
| C4  | C26 | ; HEMC-based C framework exclusions |
| C4  | C7  | ; HEMC-based C framework exclusions |
| C30 | C26 | ; HEMC-based C framework exclusions |
| C30 | C5  | ; HEMC-based C framework exclusions |
| C5  | C8  | ; HEMC-based C framework exclusions |
| C5  | C9  | ; HEMC-based C framework exclusions |
| C5  | C36 | ; HEMC-based C framework exclusions |
| C5  | C37 | ; HEMC-based C framework exclusions |
| C35 | C7  | ; HEMC-based C framework exclusions |
| C6  | C41 | ; HEMC-based C framework exclusions |
| C6  | C10 | ; HEMC-based C framework exclusions |
| C7  | C10 | ; HEMC-based C framework exclusions |
| C8  | H10 | ; HEMC-based C framework exclusions |
| C8  | C11 | ; HEMC-based C framework exclusions |
| C9  | C36 | ; HEMC-based C framework exclusions |

Supplementary Material (ESI) for Molecular BioSystems  
This journal is (c) The Royal Society of Chemistry, 2010

```

C9      C37      ; HEMC-based C framework exclusions
C9      C12      ; HEMC-based C framework exclusions
C36     C41      ; HEMC-based C framework exclusions
C37     C10      ; HEMC-based C framework exclusions
C10     C13      ; HEMC-based C framework exclusions
C10     C14      ; HEMC-based C framework exclusions
C10     C46      ; HEMC-based C framework exclusions
C10     C47      ; HEMC-based C framework exclusions
H10     C12      ; HEMC-based C framework exclusions
C11     C48      ; HEMC-based C framework exclusions
C11     C15      ; HEMC-based C framework exclusions
C12     C15      ; HEMC-based C framework exclusions
C13     C53      ; HEMC-based C framework exclusions
C13     C16      ; HEMC-based C framework exclusions
C14     C46      ; HEMC-based C framework exclusions
C14     C47      ; HEMC-based C framework exclusions
C14     C17      ; HEMC-based C framework exclusions
C46     C48      ; HEMC-based C framework exclusions
C47     C48      ; HEMC-based C framework exclusions
C48     C15      ; HEMC-based C framework exclusions
C15     C18      ; HEMC-based C framework exclusions
C15     C19      ; HEMC-based C framework exclusions
C15     C54      ; HEMC-based C framework exclusions
C15     C55      ; HEMC-based C framework exclusions
C53     C17      ; HEMC-based C framework exclusions
C16     C60      ; HEMC-based C framework exclusions
C19     C54      ; HEMC-based C framework exclusions
C19     C55      ; HEMC-based C framework exclusions
C54     C60      ; HEMC-based C framework exclusions
C55     C60      ; HEMC-based C framework exclusions
;
; cyano group addition to the original B12 topology
;
N21     N1C      ; cyano exclusions from HEMC CO group
N22     N1C      ; cyano exclusions from HEMC CO group
N23     N1C      ; cyano exclusions from HEMC CO group
N24     N1C      ; cyano exclusions from HEMC CO group
C1      C1N      ; cyano exclusions from HEMC CO group
C4      C1N      ; cyano exclusions from HEMC CO group
C6      C1N      ; cyano exclusions from HEMC CO group
C9      C1N      ; cyano exclusions from HEMC CO group
C11     C1N      ; cyano exclusions from HEMC CO group
C14     C1N      ; cyano exclusions from HEMC CO group
C16     C1N      ; cyano exclusions from HEMC CO group
C19     C1N      ; cyano exclusions from HEMC CO group
N3B     N1C      ; cyano exclusion unique to 6-coordinate iron
C1N     C9B      ; additional cyano exclusion at Fe 6-center
C1N     C2B      ; additional cyano exclusion at Fe 6-center
[ angles ]
; ai      aj      ak      gromos type
C2      C26     C27     ga_15      ; from GLN, fragment 1
C26     C27     O28     ga_30      ; from GLN
C26     C27     N29     ga_19      ; from GLN
O28     C27     N29     ga_33      ; from GLN
C27     N29     HAE     ga_23      ; from GLN
C27     N29     HAD     ga_23      ; from GLN
HAE     N29     HAD     ga_24      ; from GLN
C30     C31     C32     ga_15      ; from GLN, fragment 2
C31     C32     O34     ga_30      ; from GLN
C31     C32     N33     ga_19      ; from GLN
O34     C32     N33     ga_33      ; from GLN
C32     N33     HAG     ga_23      ; from GLN
C32     N33     HAF     ga_23      ; from GLN
HAG     N33     HAF     ga_24      ; from GLN
C7      C37     C38     ga_15      ; from GLN, fragment 3
C37     C38     O39     ga_30      ; from GLN
C37     C38     N40     ga_19      ; from GLN
O39     C38     N40     ga_33      ; from GLN
C38     N40     HAI     ga_23      ; from GLN
C38     N40     HAH     ga_23      ; from GLN
HAI     N40     HAH     ga_24      ; from GLN
C41     C42     C43     ga_15      ; from GLN, fragment 4
C42     C43     O44     ga_30      ; from GLN
C42     C43     N45     ga_19      ; from GLN
O44     C43     N45     ga_33      ; from GLN
C43     N45     HAK     ga_23      ; from GLN
C43     N45     HAJ     ga_23      ; from GLN
HAK     N45     HAJ     ga_24      ; from GLN
C48     C49     C50     ga_15      ; from GLN, fragment 5
C49     C50     O51     ga_30      ; from GLN
C49     C50     N52     ga_19      ; from GLN

```

Supplementary Material (ESI) for Molecular BioSystems  
This journal is (c) The Royal Society of Chemistry, 2010

|     |     |     |       |                                                            |
|-----|-----|-----|-------|------------------------------------------------------------|
| O51 | C50 | N52 | ga_33 | ; from GLN                                                 |
| C50 | N52 | HAM | ga_23 | ; from GLN                                                 |
| C50 | N52 | HAL | ga_23 | ; from GLN                                                 |
| HAM | N52 | HAL | ga_24 | ; from GLN                                                 |
| C18 | C60 | C61 | ga_15 | ; from GLN, fragment 6                                     |
| C60 | C61 | O63 | ga_30 | ; from GLN                                                 |
| C60 | C61 | N62 | ga_19 | ; from GLN                                                 |
| O63 | C61 | N62 | ga_33 | ; from GLN                                                 |
| C61 | N62 | HAO | ga_23 | ; from GLN                                                 |
| C61 | N62 | HAN | ga_23 | ; from GLN                                                 |
| HAO | N62 | HAN | ga_24 | ; from GLN                                                 |
| N21 | FE  | N22 | ga_2  | ; corrin ring Fe-N angle                                   |
| N21 | FE  | N24 | ga_2  | ; corrin ring Fe-N angle                                   |
| N22 | FE  | N23 | ga_2  | ; corrin ring Fe-N angle                                   |
| N23 | FE  | N24 | ga_2  | ; corrin ring Fe-N angle                                   |
| N21 | FE  | N3B | ga_2  | ; corrin-Fe-dimethylbenzimidazole                          |
| N22 | FE  | N3B | ga_2  | ; corrin-Fe-dimethylbenzimidazole                          |
| N23 | FE  | N3B | ga_2  | ; corrin-Fe-dimethylbenzimidazole                          |
| N24 | FE  | N3B | ga_2  | ; corrin-Fe-dimethylbenzimidazole                          |
| FE  | N21 | C1  | ga_34 | ; corrin Fe-N-C angles (based on HEMC)                     |
| FE  | N21 | C4  | ga_34 | ; corrin Fe-N-C angles (based on HEMC)                     |
| FE  | N22 | C6  | ga_34 | ; corrin Fe-N-C angles (based on HEMC)                     |
| FE  | N22 | C9  | ga_34 | ; corrin Fe-N-C angles (based on HEMC)                     |
| FE  | N23 | C11 | ga_34 | ; corrin Fe-N-C angles (based on HEMC)                     |
| FE  | N23 | C14 | ga_34 | ; corrin Fe-N-C angles (based on HEMC)                     |
| FE  | N24 | C16 | ga_34 | ; corrin Fe-N-C angles (based on HEMC)                     |
| FE  | N24 | C19 | ga_34 | ; corrin Fe-N-C angles (based on HEMC)                     |
| FE  | N3B | C9B | ga_34 | ; Fe-dimethylbenzimidazole-N,C angle                       |
| FE  | N3B | C2B | ga_34 | ; Fe-dimethylbenzimidazole-N,C angle                       |
| C8B | N1B | C2B | ga_7  | ; angle containing C8B, see minimization issues discussion |
| N1B | C8B | C9B | ga_7  | ; angle containing C8B, see minimization issues discussion |
| C8B | C9B | N3B | ga_7  | ; angle containing C8B, see minimization issues discussion |
| C7B | C8B | N1B | ga_39 | ; angle containing C8B, see minimization issues discussion |
| C8B | N1B | C1R | ga_37 | ; angle containing C8B, see minimization issues discussion |
| C4B | C9B | C8B | ga_27 | ; angle containing C8B, see minimization issues discussion |
| C6B | C7B | C8B | ga_27 | ; angle containing C8B, see minimization issues discussion |
| C7B | C8B | C9B | ga_27 | ; angle containing C8B, see minimization issues discussion |
| N21 | C1  | C2  | ga_13 | ; corrin ring-specific but HEMC-derived angles             |
| N21 | C1  | C20 | ga_13 | ; corrin ring-specific but HEMC-derived angles             |
| N21 | C4  | C3  | ga_33 | ; corrin ring-specific but HEMC-derived angles             |
| C4  | N21 | C1  | ga_6  | ; corrin ring-specific but HEMC-derived angles             |
| C5  | C4  | N21 | ga_33 | ; corrin ring-specific but HEMC-derived angles             |
| C19 | C1  | N21 | ga_13 | ; corrin ring-specific but HEMC-derived angles             |
| N22 | C6  | C5  | ga_33 | ; corrin ring-specific but HEMC-derived angles             |
| N22 | C6  | C7  | ga_33 | ; corrin ring-specific but HEMC-derived angles             |
| N22 | C9  | C8  | ga_33 | ; corrin ring-specific but HEMC-derived angles             |
| C9  | N22 | C6  | ga_6  | ; corrin ring-specific but HEMC-derived angles             |
| C10 | C9  | N22 | ga_33 | ; corrin ring-specific but HEMC-derived angles             |
| N23 | C11 | C10 | ga_33 | ; corrin ring-specific but HEMC-derived angles             |
| N23 | C11 | C12 | ga_33 | ; corrin ring-specific but HEMC-derived angles             |
| N23 | C14 | C13 | ga_33 | ; corrin ring-specific but HEMC-derived angles             |
| C14 | N23 | C11 | ga_6  | ; corrin ring-specific but HEMC-derived angles             |
| C15 | C14 | N23 | ga_33 | ; corrin ring-specific but HEMC-derived angles             |
| N24 | C16 | C15 | ga_33 | ; corrin ring-specific but HEMC-derived angles             |
| N24 | C19 | C1  | ga_13 | ; corrin ring-specific but HEMC-derived angles             |
| C19 | N24 | C16 | ga_6  | ; corrin ring-specific but HEMC-derived angles             |
| C17 | C16 | N24 | ga_33 | ; corrin ring-specific but HEMC-derived angles             |
| C18 | C19 | N24 | ga_13 | ; corrin ring-specific but HEMC-derived angles             |
| C3R | O2P | P   | ga_26 | ; phosphate angle from ADE                                 |
| O2P | P   | O3  | ga_5  | ; phosphate angle from ADE                                 |
| O2P | P   | O4  | ga_14 | ; phosphate angle from ADE                                 |
| O2P | P   | O5  | ga_14 | ; phosphate angle from ADE                                 |
| O3  | P   | O4  | ga_14 | ; phosphate angle from ADE                                 |
| O3  | P   | O5  | ga_14 | ; phosphate angle from ADE                                 |
| O4  | P   | O5  | ga_29 | ; phosphate angle from ADE                                 |
| P   | O3  | C2P | ga_26 | ; phosphate angle from ADE                                 |
| O2P | C3R | C2R | ga_9  | ; phosphate oxygen to CHn carbons from ADE                 |
| O2P | C3R | C4R | ga_9  | ; phosphate oxygen to CHn carbons from ADE                 |
| O3  | C2P | C1P | ga_9  | ; phosphate oxygen to CHn carbons from ADE                 |
| O3  | C2P | C3P | ga_9  | ; phosphate oxygen to CHn carbons from ADE                 |
| C1  | C2  | C26 | ga_13 | ; CHn-CHn-CHn angles                                       |
| C1  | C2  | C25 | ga_13 | ; CHn-CHn-CHn angles                                       |
| C1  | C2  | C3  | ga_13 | ; CHn-CHn-CHn angles                                       |
| C1  | C19 | C18 | ga_13 | ; CHn-CHn-CHn angles                                       |
| C2  | C1  | C19 | ga_13 | ; CHn-CHn-CHn angles                                       |
| C2  | C1  | C20 | ga_13 | ; CHn-CHn-CHn angles                                       |
| C2  | C3  | C30 | ga_13 | ; CHn-CHn-CHn angles                                       |
| C3  | C2  | C25 | ga_13 | ; CHn-CHn-CHn angles                                       |
| C3  | C2  | C26 | ga_13 | ; CHn-CHn-CHn angles                                       |
| C3  | C30 | C31 | ga_13 | ; CHn-CHn-CHn angles                                       |
| C7  | C8  | C41 | ga_13 | ; CHn-CHn-CHn angles                                       |

Supplementary Material (ESI) for Molecular BioSystems  
This journal is (c) The Royal Society of Chemistry, 2010

```

C8      C41      C42      ga_13 ; CHn-CHn-CHn angles
C12     C13     C48      ga_13 ; CHn-CHn-CHn angles
C13     C12     C46      ga_13 ; CHn-CHn-CHn angles
C13     C12     C47      ga_13 ; CHn-CHn-CHn angles
C13     C48     C49      ga_13 ; CHn-CHn-CHn angles
C17     C18     C19      ga_13 ; CHn-CHn-CHn angles
C17     C18     C60      ga_13 ; CHn-CHn-CHn angles
C17     C55     C56      ga_13 ; CHn-CHn-CHn angles
C18     C17     C54      ga_13 ; CHn-CHn-CHn angles
C18     C17     C55      ga_13 ; CHn-CHn-CHn angles
C19     C1      C20      ga_13 ; CHn-CHn-CHn angles
C19     C18     C60      ga_13 ; CHn-CHn-CHn angles
C25     C2      C26      ga_13 ; CHn-CHn-CHn angles
C46     C12     C47      ga_13 ; CHn-CHn-CHn angles
C54     C17     C55      ga_13 ; CHn-CHn-CHn angles
C36     C7      C37      ga_13 ; CHn-CHn-CHn angles
C2      C3      C4       ga_15 ; sp3-sp3-sp2 corrin ring carbon angle
C4      C3      C30      ga_15 ; sp3-sp3-sp2 corrin ring carbon angle
C6      C7      C8       ga_15 ; sp3-sp3-sp2 corrin ring carbon angle
C6      C7      C36      ga_15 ; sp3-sp3-sp2 corrin ring carbon angle
C6      C7      C37      ga_15 ; sp3-sp3-sp2 corrin ring carbon angle
C7      C8      C9       ga_15 ; sp3-sp3-sp2 corrin ring carbon angle
C8      C7      C36      ga_15 ; sp3-sp3-sp2 corrin ring carbon angle
C8      C7      C37      ga_15 ; sp3-sp3-sp2 corrin ring carbon angle
C9      C8      C41      ga_15 ; sp3-sp3-sp2 corrin ring carbon angle
C11     C12     C13      ga_15 ; sp3-sp3-sp2 corrin ring carbon angle
C11     C12     C46      ga_15 ; sp3-sp3-sp2 corrin ring carbon angle
C11     C12     C47      ga_15 ; sp3-sp3-sp2 corrin ring carbon angle
C12     C13     C14      ga_15 ; sp3-sp3-sp2 corrin ring carbon angle
C14     C13     C48      ga_15 ; sp3-sp3-sp2 corrin ring carbon angle
C16     C17     C18      ga_15 ; sp3-sp3-sp2 corrin ring carbon angle
C16     C17     C54      ga_15 ; sp3-sp3-sp2 corrin ring carbon angle
C16     C17     C55      ga_15 ; sp3-sp3-sp2 corrin ring carbon angle
C4      C5      C6       ga_27 ; sp2-sp2-sp2 corrin ring carbon angle
C9      C10     C11      ga_27 ; sp2-sp2-sp2 corrin ring carbon angle
C14     C15     C16      ga_27 ; sp2-sp2-sp2 corrin ring carbon angle
C3      C4      C5       ga_37 ; sp3-sp2-sp2 corrin ring carbon angle
C4      C5      C35      ga_37 ; sp3-sp2-sp2 corrin ring carbon angle
C5      C6      C7       ga_37 ; sp3-sp2-sp2 corrin ring carbon angle
C6      C5      C35      ga_37 ; sp3-sp2-sp2 corrin ring carbon angle
C8      C9      C10      ga_37 ; sp3-sp2-sp2 corrin ring carbon angle
C10     C11     C12      ga_37 ; sp3-sp2-sp2 corrin ring carbon angle
C13     C14     C15      ga_37 ; sp3-sp2-sp2 corrin ring carbon angle
C14     C15     C53      ga_37 ; sp3-sp2-sp2 corrin ring carbon angle
C15     C16     C17      ga_37 ; sp3-sp2-sp2 corrin ring carbon angle
C16     C15     C53      ga_37 ; sp3-sp2-sp2 corrin ring carbon angle
C5M     C5B     C4B      ga_37 ; sp2-sp2-methyl dimethylbenzimidazole angle
C5M     C5B     C6B      ga_37 ; sp2-sp2-methyl dimethylbenzimidazole angle
C6M     C6B     C5B      ga_37 ; sp2-sp2-methyl dimethylbenzimidazole angle
C6M     C6B     C7B      ga_37 ; sp2-sp2-methyl dimethylbenzimidazole angle
C4B     C5B     C6B      ga_27 ; Csp2-Csp2-Csp2 dimethylbenzimidazole angle
C5B     C4B     C9B      ga_27 ; Csp2-Csp2-Csp2 dimethylbenzimidazole angle
C5B     C6B     C7B      ga_27 ; Csp2-Csp2-Csp2 dimethylbenzimidazole angle
N1B     C1R     C2R      ga_9 ; from ADE Nsp2-containing dimethylbenzimidazole angle
N1B     C1R     O6R      ga_9 ; from ADE Nsp2-containing dimethylbenzimidazole angle
N1B     C2B     N3B      ga_7 ; from ADE Nsp2-containing dimethylbenzimidazole angle
C2B     N1B     C1R      ga_37 ; from ADE Nsp2-containing dimethylbenzimidazole angle
N3B     C9B     C4B      ga_39 ; from ADE Nsp2-containing dimethylbenzimidazole angle
C9B     N3B     C2B      ga_7 ; from ADE Nsp2-containing dimethylbenzimidazole angle
C1R     C2R     C3R      ga_8 ; from ADE sugar angle
C1R     C2R     O7R      ga_9 ; from ADE sugar angle
C1R     O6R     C4R      ga_10 ; from ADE sugar angle
C2R     C1R     O6R      ga_9 ; from ADE sugar angle
C2R     C3R     C4R      ga_8 ; from ADE sugar angle
C2R     O7R     HAA      ga_12 ; from ADE sugar angle
C3R     C2R     O7R      ga_9 ; from ADE sugar angle
C3R     C4R     C5R      ga_8 ; from ADE sugar angle
C3R     C4R     O6R      ga_9 ; from ADE sugar angle
C4R     C5R     O8R      ga_9 ; from ADE sugar angle
;
; HAB angle is gone from B12 for LYB C5R O8R HAB ga_12 ; from ADE sugar angle
;
C5R     C4R     O6R      ga_9 ; from ADE sugar angle
C1P     C2P     C3P      ga_13 ; amide linkage angle
C57     C56     C55      ga_13 ; amide linkage angle
C57     N59     HAC      ga_23 ; from GLN angle
N59     C57     O58      ga_33 ; from GLN angle
C56     C57     N59      ga_19 ; from GLN angle
O58     C57     C56      ga_30 ; from GLN angle
C1P     N59     C57      ga_31 ; from force field angle definitions
C1P     N59     HAC      ga_18 ; from force field angle definitions

```

Supplementary Material (ESI) for Molecular BioSystems  
This journal is (c) The Royal Society of Chemistry, 2010

```

C2P C1P N59 ga_15 ; from force field angle definitions
C5B C4B H4B ga_25 ; from PHE C-C-H angle
C9B C4B H4B ga_25 ; from PHE C-C-H angle
C6B C7B H7B ga_25 ; from PHE C-C-H angle
C8B C7B H7B ga_25 ; from PHE C-C-H angle
N1B C2B H2B ga_36 ; from ADE N-C-H angle
N3B C2B H2B ga_36 ; from ADE N-C-H angle
C9 C10 H10 ga_25 ; corrin ring C-C10-H angle
C11 C10 H10 ga_20 ; corrin ring C-C10-H angle
C5R O8R CLB ga_12 ; for LYS-B12 bridge (just replaces O8R H atom with CLB)
;
; standard Lysine angle topology
;
-C N H ga_32 ; Standard LYS (lysine)
-C N CA ga_31 ; Standard LYS (lysine)
H N CA ga_18 ; Standard LYS (lysine)
N CA CB ga_13 ; Standard LYS (lysine)
N CA C ga_13 ; Standard LYS (lysine)
CB CA C ga_13 ; Standard LYS (lysine)
CA CB CG ga_15 ; Standard LYS (lysine)
CB CG CD ga_15 ; Standard LYS (lysine)
CG CD CE ga_15 ; Standard LYS (lysine)
CD CE NZ ga_15 ; Standard LYS (lysine)
CE NZ HZ1 ga_11 ; Standard LYS (lysine)
CE NZ CLB ga_6 ; Modification from LYS (CLB from NZ H atom)
HZ1 NZ CLB ga_23 ; Modification from LYS (CLB from NZ H atom)
CA C O ga_30 ; Standard LYS (lysine)
CA C +N ga_19 ; Standard LYS (lysine)
O C +N ga_33 ; Standard LYS (lysine)
;
; additional CLB-OLB angle linkages
;
OLB CLB O8R ga_33 ; new OLB-CLB linkage angles
OLB CLB NZ ga_33 ; new OLB-CLB linkage angles
O8R CLB NZ ga_33 ; new OLB-CLB linkage angles
;
; cyano group addition to the original B12 topology
;
FE C1N N1C ga_41 ; cyano group from HEMC CO group
N21 FE C1N ga_1 ; cyano group from HEMC CO group
N22 FE C1N ga_1 ; cyano group from HEMC CO group
N23 FE C1N ga_1 ; cyano group from HEMC CO group
N24 FE C1N ga_1 ; cyano group from HEMC CO group
N3B FE C1N ga_1 ; cyano group from HEMC CO group (found during pdb2gmx)
; N3B FE C1N ga_41 ; cyano group from HEMC CO group (found during pdb2gmx)
[ impropers ]
; ai aj ak al gromos type
C1R C8B C2B N1B gi_1 ; dimethylbenzimidazole improper for planarity
N1B C8B C9B N3B gi_1 ; dimethylbenzimidazole improper for planarity
C8B N1B C7B C9B gi_1 ; dimethylbenzimidazole improper for planarity
C8B N1B C2B N3B gi_1 ; dimethylbenzimidazole improper for planarity
C8B C7B C6B C5B gi_1 ; dimethylbenzimidazole improper for planarity
C8B C9B N3B C2B gi_1 ; dimethylbenzimidazole improper for planarity
C7B C8B C9B C4B gi_1 ; dimethylbenzimidazole improper for planarity
C7B C6B C5B C4B gi_1 ; dimethylbenzimidazole improper for planarity
C6B C5B C4B C9B gi_1 ; dimethylbenzimidazole improper for planarity
C5B C4B C9B C8B gi_1 ; dimethylbenzimidazole improper for planarity
C9B C8B C7B C6B gi_1 ; dimethylbenzimidazole improper for planarity
C9B C4B N3B C8B gi_1 ; dimethylbenzimidazole improper for planarity
C9B N3B C2B N1B gi_1 ; dimethylbenzimidazole improper for planarity
C2B N1B C8B C9B gi_1 ; dimethylbenzimidazole improper for planarity
C5M C4B C6B C5B gi_1 ; dimethylbenzimidazole methyl groups
C6M C7B C5B C6B gi_1 ; dimethylbenzimidazole methyl groups
C2B N1B N3B H2B gi_1 ; dimethylbenzimidazole H atom-containing planarity
C4B C9B C5B H4B gi_1 ; dimethylbenzimidazole H atom-containing planarity
C7B C8B C6B H7B gi_1 ; dimethylbenzimidazole H atom-containing planarity
N3B FE C2B C9B gi_1 ; Fe-dimethylbenzimidazole planarity
N21 C4 C5 C6 gi_1 ; HEMC-based conjugated corrin ring improper planarity
N22 C6 C5 C4 gi_1 ; HEMC-based conjugated corrin ring improper planarity
N22 C9 C10 C11 gi_1 ; HEMC-based conjugated corrin ring improper planarity
N23 C11 C10 C9 gi_1 ; HEMC-based conjugated corrin ring improper planarity
N23 C14 C15 C16 gi_1 ; HEMC-based conjugated corrin ring improper planarity
N24 C16 C15 C14 gi_1 ; HEMC-based conjugated corrin ring improper planarity
C5 C4 C6 C35 gi_1 ; corrin ring on-Csp2 methyl group improper planarity
C15 C16 C14 C53 gi_1 ; corrin ring on-Csp2 methyl group improper planarity
C27 O28 N29 C26 gi_1 ; from GLN improper torsion definition
N29 HAE HAD C27 gi_1 ; from GLN improper torsion definition
C32 O34 N33 C31 gi_1 ; from GLN improper torsion definition
N33 HAG HAF C32 gi_1 ; from GLN improper torsion definition
C38 O39 N40 C37 gi_1 ; from GLN improper torsion definition
N40 HAI HAH C38 gi_1 ; from GLN improper torsion definition

```



Supplementary Material (ESI) for Molecular BioSystems  
This journal is (c) The Royal Society of Chemistry, 2010

```

C43 O44 N45 C42 gi_1 ; from GLN improper torsion definition
N45 HAK HAJ C43 gi_1 ; from GLN improper torsion definition
C50 O51 N52 C49 gi_1 ; from GLN improper torsion definition
N52 HAM HAL C50 gi_1 ; from GLN improper torsion definition
C61 O63 N62 C60 gi_1 ; from GLN improper torsion definition
N62 HAO HAN C61 gi_1 ; from GLN improper torsion definition
C57 C56 O58 N59 gi_1 ; amide linkage C57 planarity
N59 C57 C1P HAC gi_1 ; amide linkage N59 planarity
C4 N21 C3 C5 gi_1 ; corrin ring C sp2 planarity
C5 C4 C6 C35 gi_1 ; corrin ring C sp2 planarity
C6 N22 C5 C7 gi_1 ; corrin ring C sp2 planarity
C9 N22 C10 C8 gi_1 ; corrin ring C sp2 planarity
C11 N23 C10 C12 gi_1 ; corrin ring C sp2 planarity
C14 N23 C15 C13 gi_1 ; corrin ring C sp2 planarity
C15 C14 C16 C53 gi_1 ; corrin ring C sp2 planarity
C16 N24 C15 C17 gi_1 ; corrin ring C sp2 planarity
C10 C9 C11 H10 gi_1 ; corrin ring C10 planarity
C18 C17 C19 C60 gi_2 ; corrin ring C atom sp3 tetrahedral geometry
C19 N24 C18 C1 gi_2 ; corrin ring C atom sp3 tetrahedral geometry
C3 C2 C30 C4 gi_2 ; corrin ring C atom sp3 tetrahedral geometry
C8 C9 C7 C41 gi_2 ; corrin ring C atom sp3 tetrahedral geometry
C13 C14 C12 C48 gi_2 ; corrin ring C atom sp3 tetrahedral geometry
C2P C1P O3 C3P gi_2 ; corrin ring C atom sp3 tetrahedral geometry
C1R N1B C2R O6R gi_2 ; sugar C atom tetrahedral geometry
C2R O7R C3R C1R gi_2 ; sugar C atom tetrahedral geometry
C3R C5R O6R C4R gi_2 ; sugar C atom tetrahedral geometry
C3R C2R O2P C4R gi_2 ; sugar C atom tetrahedral geometry
FE C1 C4 N21 gi_3 ; HEMC improper definition
FE C6 C9 N22 gi_3 ; HEMC improper definition
FE C11 C14 N23 gi_3 ; HEMC improper definition
FE C16 C19 N24 gi_3 ; HEMC improper definition
;
; standard Lysine improper torsions
;
N -C CA H gi_1 ; Standard LYS (lysine)
CA N C CB gi_2 ; Standard LYS (lysine)
C CA +N O gi_1 ; Standard LYS (lysine)
CLB O8R OLB NZ gi_1 ; Linkage improper torsion to maintain planarity at CLB
[ dihedrals ]
; ai aj ak al gromos type
C3R O2P P O3 gd_20 ; from ADE phosphate definition
C3R O2P P O3 gd_27 ; from ADE phosphate definition
C2P O3 P O2P gd_20 ; from ADE phosphate definition
C2P O3 P O2P gd_27 ; from ADE phosphate definition
P O3 C2P C1P gd_7 ; from ADE phosphate definition
C2R C3R O2P P gd_29 ; from ADE phosphate definition
O8R C5R C4R O6R gd_8 ; from ADE sugar dihedrals
O8R C5R C4R O6R gd_25 ; from ADE sugar dihedrals
O8R C5R C4R C3R gd_17 ; from ADE sugar dihedrals
O8R C5R C4R C3R gd_34 ; from ADE sugar dihedrals
C3R C4R O6R C1R gd_29 ; from ADE sugar dihedrals
C5R C4R C3R C2R gd_34 ; from ADE sugar dihedrals
C5R C4R C3R O2P gd_17 ; from ADE sugar dihedrals
O6R C4R C3R C2R gd_17 ; from ADE sugar dihedrals
O6R C4R C3R O2P gd_18 ; from ADE sugar dihedrals
C4R O6R C1R C2R gd_29 ; from ADE sugar dihedrals
O6R C1R C2R O7R gd_18 ; from ADE sugar dihedrals
O6R C1R C2R C3R gd_17 ; from ADE sugar dihedrals
O6R C1R C2R C3R gd_34 ; from ADE sugar dihedrals
C1R C2R C3R C4R gd_34 ; from ADE sugar dihedrals
C1R C2R C3R O2P gd_17 ; from ADE sugar dihedrals
O7R C2R C3R C4R gd_17 ; from ADE sugar dihedrals
O7R C2R C3R O2P gd_18 ; from ADE sugar dihedrals
C1R C2R O7R HAA gd_23 ; from ADE sugar dihedrals
N1B C1R C2R O7R gd_17 ; from ADE sugar dihedrals
O6R C1R N1B C8B gd_16 ; from ADE sugar dihedrals
;
; HAB-based torsion gone for LYB C4R C5R O8R HAB gd_2 ; additional ADE-based sugar dihedral
;
N1B C1R C2R C3R gd_17 ; additional ADE-based sugar dihedral
N1B C1R O6R C4R gd_17 ; additional ADE-based sugar dihedral
C2 C26 C27 N29 gd_40 ; from GLN dihedral
C26 C27 N29 HAD gd_14 ; from GLN dihedral
C30 C31 C32 N33 gd_40 ; from GLN dihedral
C31 C32 N33 HAF gd_14 ; from GLN dihedral
C7 C37 C38 N40 gd_40 ; from GLN dihedral
C37 C38 N40 HAH gd_14 ; from GLN dihedral
C41 C42 C43 N45 gd_40 ; from GLN dihedral
C42 C43 N45 HAJ gd_14 ; from GLN dihedral
C48 C49 C50 N52 gd_40 ; from GLN dihedral
C49 C50 N52 HAL gd_14 ; from GLN dihedral

```

Supplementary Material (ESI) for Molecular BioSystems  
This journal is (c) The Royal Society of Chemistry, 2010

```

C18 C60 C61 N62 gd_40 ; from GLN dihedral
C60 C61 N62 HAN gd_14 ; from GLN dihedral
C5M C5B C6B C6M gd_33 ; dimethylbenzimidazole methyl dihedral fix
C4B C5B C6B C6M gd_10 ; dimethylbenzimidazole methyl dihedral fix
C8B C7B C6B C6M gd_10 ; dimethylbenzimidazole methyl dihedral fix
C7B C6B C5B C5M gd_10 ; dimethylbenzimidazole methyl dihedral fix
C9B C4B C5B C5M gd_10 ; dimethylbenzimidazole methyl dihedral fix
C35 C5 C4 N21 gd_10 ; corrin ring methyl planarity
C35 C5 C6 N22 gd_10 ; corrin ring methyl planarity
C53 C15 C14 N23 gd_10 ; corrin ring methyl planarity
C53 C1 C16 N24 gd_10 ; corrin ring methyl planarity
N24 C19 C1 N21 gd_34 ; corrin ring but HEMC-derived N,C torsions
N24 C19 C1 N21 gd_34 ; corrin ring but HEMC-derived N,C torsions
N21 C4 C5 C6 gd_15 ; corrin ring but HEMC-derived N,C torsions
C4 C5 C6 N22 gd_15 ; corrin ring but HEMC-derived N,C torsions
N22 C9 C10 C11 gd_15 ; corrin ring but HEMC-derived N,C torsions
C9 C10 C11 N23 gd_15 ; corrin ring but HEMC-derived N,C torsions
N23 C14 C15 C16 gd_15 ; corrin ring but HEMC-derived N,C torsions
C14 C15 C16 N24 gd_15 ; corrin ring but HEMC-derived N,C torsions
C1 C2 C26 C27 gd_40 ; corrin ring HEMC derived CHn torsions
C25 C2 C26 C27 gd_34 ; corrin ring HEMC derived CHn torsions
C2 C26 C27 C28 gd_34 ; corrin ring HEMC derived CHn torsions
C2 C3 C30 C31 gd_9 ; corrin ring HEMC derived CHn torsions
C3 C30 C31 C32 gd_40 ; corrin ring HEMC derived CHn torsions
C30 C31 C32 C34 gd_40 ; corrin ring HEMC derived CHn torsions
C6 C7 C37 C38 gd_40 ; corrin ring HEMC derived CHn torsions
C36 C7 C37 C38 gd_40 ; corrin ring HEMC derived CHn torsions
C7 C37 C38 C39 gd_40 ; corrin ring HEMC derived CHn torsions
C7 C8 C41 C42 gd_9 ; corrin ring HEMC derived CHn torsions
C8 C41 C42 C43 gd_34 ; corrin ring HEMC derived CHn torsions
C41 C42 C43 C44 gd_40 ; corrin ring HEMC derived CHn torsions
C12 C13 C48 C49 gd_9 ; corrin ring HEMC derived CHn torsions
C13 C48 C49 C50 gd_34 ; corrin ring HEMC derived CHn torsions
C48 C49 C50 C51 gd_40 ; corrin ring HEMC derived CHn torsions
C16 C17 C55 C56 gd_40 ; corrin ring HEMC derived CHn torsions
C54 C17 C56 C57 gd_40 ; corrin ring HEMC derived CHn torsions
C17 C55 C56 C57 gd_34 ; corrin ring HEMC derived CHn torsions
C55 C56 C57 C58 gd_40 ; corrin ring HEMC derived CHn torsions
C17 C18 C60 C61 gd_9 ; corrin ring HEMC derived CHn torsions
C18 C60 C61 C63 gd_34 ; corrin ring HEMC derived CHn torsions
C18 C17 C55 C56 gd_9 ; corrin ring HEMC derived CHn torsions
N59 C1P C2P C3 gd_34 ; amide linkage torsion terms
N59 C1P C2P C3P gd_34 ; amide linkage torsion terms
C2P C1P N59 C57 gd_34 ; amide linkage torsion terms
C56 C57 N59 C1P gd_14 ; amide linkage torsion terms
C55 C56 C57 N59 gd_40 ; amide linkage torsion terms
C17 C55 C56 C57 gd_40 ; amide linkage torsion terms
C5 C4 N21 C1 gd_14 ; corrin ring sp3-containing torsions
C10 C9 N22 C6 gd_14 ; corrin ring sp3-containing torsions
C5 C6 N22 C9 gd_14 ; corrin ring sp3-containing torsions
C15 C14 N23 C11 gd_14 ; corrin ring sp3-containing torsions
C10 C11 N23 C14 gd_14 ; corrin ring sp3-containing torsions
C15 C16 N24 C19 gd_14 ; corrin ring sp3-containing torsions
C4 N21 C1 C2 gd_40 ; corrin ring sp3-containing torsions
C18 C19 N24 C16 gd_40 ; corrin ring sp3-containing torsions
N22 C6 C5 C4 gd_33 ; corrin ring sp3-containing torsions
N23 C11 C10 C9 gd_33 ; corrin ring sp3-containing torsions
C19 C18 C17 C55 gd_34 ; corrin ring sp3-containing torsions
C55 C17 C16 C15 gd_40 ; corrin ring sp3-containing torsions
C17 C18 C19 C1 gd_34 ; corrin ring sp3-containing torsions
C18 C19 C1 C2 gd_34 ; corrin ring sp3-containing torsions
C17 C16 C15 C14 gd_10 ; corrin ring sp3-containing torsions
C16 C15 C14 C13 gd_10 ; corrin ring sp3-containing torsions
C15 C14 C13 C12 gd_40 ; corrin ring sp3-containing torsions
C6 C7 C8 C9 gd_34 ; corrin ring sp3-containing torsions
C8 C7 C6 C5 gd_34 ; corrin ring sp3-containing torsions
C30 C3 C2 C1 gd_34 ; corrin ring sp3-containing torsions
C11 C12 C13 C14 gd_34 ; corrin ring sp3-containing torsions
C13 C12 C11 C10 gd_34 ; corrin ring sp3-containing torsions
C10 C9 C8 C7 gd_10 ; corrin ring sp3-containing torsions
C5 C4 C3 C30 gd_34 ; corrin ring sp3-containing torsions
C3 C2 C1 C19 gd_34 ; corrin ring sp3-containing torsions
;
; standard Lysine torsion topology
;
-CA -C N CA gd_14 ; Standard LYS (lysine)
-C N CA C gd_39 ; Standard LYS (lysine)
N CA CB CG gd_34 ; Standard LYS (lysine)
N CA C +N gd_40 ; Standard LYS (lysine)
CA CB CG CD gd_34 ; Standard LYS (lysine)
CB CG CD CE gd_34 ; Standard LYS (lysine)

```

Supplementary Material (ESI) for Molecular BioSystems  
This journal is (c) The Royal Society of Chemistry, 2010

```
CG      CD      CE      NZ      gd_34      ;      Standard LYS (lysine)
CD      CE      NZ      HZ1     gd_29      ;      Standard LYS (lysine)
C4R     C5R     O8R     CLB     gd_23      ;      LYS-B12 linkage dihedral terms
C5R     O8R     CLB     OLB     gd_12      ;      LYS-B12 linkage dihedral terms
O8R     CLB     NZ      CE      gd_14      ;      LYS-B12 linkage dihedral terms
OLB     CLB     NZ      CE      gd_14      ;      LYS-B12 linkage dihedral terms
;
; Use of LYB, which employs the pdb2gmh method for sewing the peptide chain together,
; requires the addition of this very new, bulky amino acid to aminoacids.dat.
;
; cyano group dihedral.  imidazole-Fe-CN group torsion
;
C9B     N3B     FE      N21     gd_38      ;      THIS IS NEW!!!
N3B     FE      N21     C1      gd_38      ;      THIS IS NEW!!!
N3B     FE      N22     C6      gd_38      ;      THIS IS NEW!!!
N3B     FE      N23     C11     gd_38      ;      THIS IS NEW!!!
N3B     FE      N24     C16     gd_38      ;      THIS IS NEW!!!
N3B     FE      C1N     N1C     gd_38      ;      imidazole-Fe-CN torsion to 0
```
